# Supplementary material for: Coordinated regulation of acid resistance in Escherichia coli
Source: BMC Syst Biol. 2017 Jan 6;11:1. doi: 10.1186/s12918-016-0376-y (PMC5217608; doi:10.1186/s12918-016-0376-y)
Supplement: Additional file 3: — Peaks called and bound and gene expression data for Nac. (XLSX 466 kb) [file 12918_2016_376_MOESM3_ESM.xlsx]

## Sheet: Nac Zimmer and Binding
Nac Regulation from Expression	Chip-Seq Peak
Zimmer et al (2000) Table 1/3	Location	Distance to Start	Coverage	Zimmer Expression
codBA	354012	-134	77	4.225
dppABCDF	3706169	-441	479	3.38
feaR	1445404	-97	433	1.95
fklB	4426848	-110	28	2.15
gabDTP	2789145	-150	20	2.45
gadE	3656717	328	490	3.1
nupC	2510922	-142	351	3.45
ompF	986204	1	43	7
ompF	985583	622	18
oppABCDF	1299035	-171	17	2.0875
puuP	1355745	1466	26	1.75
xanQ-guaD-ygfQ	3023041	668	21	1.65
ycdXY	-	-	-	1.45
ydcSTUV	1509484	-194	163	3.4375
yedL	2008548	-76	96	4.8
yqeB	3011892	369	25	1.35
Operons derived from Ecocyc

## Sheet: Nac Binding and RNA-Seq
			ChIP-Seq				RNA-Seq
Symbol	EcoCyc Locus	Operon	Coverage	Dist2Start	Type	Position	TF Induced	WT	FC	Log2 FC	Notes
abgA	EG13352	abgABT-ogt	851	-12	intergenic	1402601	5.03	30.95	0.188732	-2.40559
abgR	EG13353	abgR,abgR	851	-164	intergenic	1402601	87.02	223.22	0.392561	-1.34901
aceB	EG10023	aceBAK	7	438	genic	4213939	82.3	122.43	0.674876	-0.567305
ackA	EG10027	ackA-pta,ackA	7	-170	intergenic	2411322	1293.22	1124.43	1.14998	0.201606
acrE	EG10266	acrEF	5	-104	intergenic	3411782	74	93.45	0.794071	-0.33266
ahpC	EG11384	ahpCF,ahpCF	8	-74	intergenic	638094	724.67	431.71	1.67704	0.745913
alaC	EG14198	alaC	7	490	genic	2495827	47.88	60.05	0.800655	-0.320747
allR	EG13616	allR	18	-56	intergenic	532179	16.16	0	17.16	4.10098
amiB	EG11363	yjeFE-amiB-mutL-miaA-hfq-hflXKC,yjeE-amiB-mutL-miaA-hfq-hflXKC,yjeFE-amiB-mutL-miaA-hfq-hflXKC,yjeFE-amiB-mutL-miaA-hfq-hflXKC	8	-283	genic	4393805	14.78	45.49	0.339428	-1.55882
amn	EG10039	amn	8	-422	genic	2052663	72.49	83.67	0.867958	-0.204303
ampD	EG10041	ampDE,ampDE	6	-14	intergenic	118719	0	49.01	0.019996	-5.64414
ansB	EG10046	ansB,ansB	21	-158	intergenic	3098908	107.04	135.66	0.790575	-0.339026
ansP	EG13776	ansP,ansP	4	305	genic	1523699	30.76	45.09	0.689087	-0.537243
araE	EG10056	araE	6	-117	intergenic	2980321	9.29	23.83	0.414418	-1.27084
araF	EG10057	araFGH,araFGH	8	-149	intergenic	1984301	19.98	81.98	0.252832	-1.98375
argO	EG11159	argO	23	-92	intergenic	3066922	0	0	1	0
argU	EG30014	argU	10	-377	genic	563569	599.28	527.02	1.13685	0.185043
aroD	EG10076	ydiNB-aroD	18	-181	genic	1772529	8.69	26.73	0.349441	-1.51688
aroE	EG10077	yrdD-rimN-aroE-yrdB	16	78	genic	3428782	32.2	57.81	0.56453	-0.824878
aroF	EG10078	aroF-tyrA	6	-350	genic	2739522	49.24	94.73	0.524809	-0.930135
asnA	EG10091	asnA	315	-138	intergenic	3925040	351.85	381.42	0.922677	-0.116103
asnC	EG10093	asnC-mioC-mnmG,asnC,asnC-mioC	315	-14	intergenic	3925040	28.72	132.62	0.222422	-2.16863
asnT	EG30020	asnT	10	-485	genic	2042088	173.48	1067.92	0.16323	-2.61502
asnV	EG30022	asnV	5	-180	intergenic	2060104	520.43	1245.9	0.418181	-1.2578
bfd	EG11181	bfd-bfr	6	96	genic	3464917	0	69.37	0.0142106	-6.13689
bfr	EG10113	bfr,bfd-bfr	6	-170	genic	3464917	525.16	524.63	1.00101	0.00145387
bglB	EG10114	bglGFB	36	490	genic	3901234	18.66	57.44	0.336413	-1.57169
bglH	EG11364	bglH-yieLK	34	-18	intergenic	3900261	24.46	29.28	0.840819	-0.250133
bglX	EG12013	bglX	17	11	genic	2220000	120.48	44.15	2.69059	1.42792
bisC	EG10124	bisC,bisC,bisC,bisC	9	308	genic	3714109	64.96	60.85	1.06645	0.0928178
blc	EG12474	blc	7	239	genic	4375506	469.1	1127.25	0.416663	-1.26305
borD	EG13637	borD	7	-215	intergenic	578331	44.84	69.02	0.65467	-0.61116
bssS	EG14335	bssS,bssS,bssS	6	-195	intergenic	1120373	180.96	79.57	2.25841	1.17531
caiF	EG13451	caiF	7	-156	intergenic	34144	532.7	649.02	0.821052	-0.284455
cbrB	EG11726	cbrB,cbrBC	11	154	genic	3895683	169.03	448.01	0.378678	-1.40096
cbrC	EG11727	cbrBC,cbrC	11	-362	genic	3895683	11.21	11.5	0.9768	-0.0338649
ccmA	EG12059	napFDAGHBC-ccmABCDEFGH,ccmABCDEFGH,napFDAGHBC-ccmABCDEFGH	17	219	genic	2295447	0	32.52	0.0298329	-5.06695
ccmB	EG12058	napFDAGHBC-ccmABCDEFGH,napFDAGHBC-ccmABCDEFGH,ccmABCDEFGH	17	-401	genic	2295447	9.94	20.4	0.511215	-0.967998
ccmH	EG12052	ccmH,napFDAGHBC-ccmABCDEFGH,ccmABCDEFGH,napFDAGHBC-ccmABCDEFGH	12	-114	genic	2290546	68.86	109.19	0.633996	-0.657455
cdaR	EG12335	cdaR	16	-3	intergenic	182460	278.94	303.71	0.91871	-0.122319
cfa	EG11531	cfa,cfa	11	-213	intergenic	1739224	218.02	306.09	0.713211	-0.487599
cheA	EG10146	motAB-cheAW	10	26	genic	1973322	43.61	37.86	1.14797	0.199081
cho	EG13993	cho	4	-212	intergenic	1821327	37.12	106.63	0.354176	-1.49746
chpS	EG11250	chpSB,chpSB	5	-76	intergenic	4446394	0	80.52	0.0122669	-6.34908
cmtA	EG11792	cmtBA-yggPFDC,cmtBA-yggPFDC,cmtBA-yggPFDC	7	336	genic	3076545	4.75	0	5.75	2.52356
cmtB	EG11791	cmtBA-yggPFDC,cmtBA-yggPFDC	14	402	genic	3076950	29.69	15.23	1.89094	0.919106
cobT	EG12151	cobUST,cobT,cobUST	12	-234	genic	2062725	18.31	50.1	0.377886	-1.40398
cobU	EG13238	cobUST,cobUST	12	-131	intergenic	2063919	0	12.39	0.0746826	-3.74308
codB	EG11327	codBA	35	-134	intergenic	354012	20.93	21.47	0.975968	-0.0350942
cpdB	EG10160	cpdB	22	-45	intergenic	4434633	149.2	177.44	0.841739	-0.248554
csiD	EG13523	csiD-ygaF-gabDTP	128	-104	intergenic	2786903	6.74	20.75	0.355862	-1.49061
csiE	EG13418	csiE	10	-11	intergenic	2663446	195.55	300.95	0.650936	-0.619413
cspH	EG14281	cspH,cspH,cspH,cspH,cspH,cspH,cspH	13	409	intergenic	1049989	216.64	539.81	0.402433	-1.31318
curA	EG13772	curA	23	-217	genic	1516834	63.51	149.87	0.427587	-1.22571
cycA	EG12504	cycA	6	-142	intergenic	4427745	60.65	43.08	1.39859	0.483977
cydA	EG10173	cydAB,cydAB,cydAB,cydAB,cydAB	31	-313	intergenic	770368	29.41	25.86	1.13217	0.179086
cynR	EG11421	cynR	385	-7	intergenic	357921	43.95	105.21	0.423218	-1.24053
cynT	EG10176	cynTSX,cynTS	385	-102	intergenic	357921	169.8	225.45	0.75425	-0.406885
cysJ	EG10191	cysJIH	5	-111	intergenic	2890031	21.97	26.3	0.841392	-0.24915
cysQ	EG10043	cysQ	22	-145	intergenic	4434633	160.13	73.02	2.17684	1.12224
cysS	EG10196	cysS,cysS	6	391	genic	554225	38.05	48.8	0.784137	-0.350823
dadA	EG11407	dadAX,dadAX,dadAX	6	-86	intergenic	1236708	45.67	20.83	2.13788	1.09618
dapB	EG10206	dapB,dapB	9	-103	intergenic	28271	8.02	32.91	0.265998	-1.91051
dcm	EG10211	dcm-vsr	13	215	genic	2030126	32.52	38.13	0.856632	-0.223253
dcp	EG10212	dcp	10	-29	intergenic	1625433	141.77	92.56	1.52597	0.609729
dcyD	EG14038	dcyD-yecSC	8	1	genic	1997503	53.43	34.26	1.54368	0.62637
ddlA	EG10213	ddlA	20	-5	intergenic	400152	2528.49	3391	0.745722	-0.42329
ddpC	EG13788	ddpXABCDF	14	-258	genic	1558192	88.19	98.02	0.900727	-0.150838
dhaK	EG13901	dhaKLM	9	-212	intergenic	1250273	6.16	44.21	0.158372	-2.65861
dhaR	EG13902	dhaR	9	-16	intergenic	1250273	58.37	52.84	1.10271	0.141056
dinI	EG12670	dinI,dinI	6	337	intergenic	1120373	26.8	54.99	0.496517	-1.01008
dinJ	EG13142	dinJ-yafQ	8	337	genic	246165	50.51	77.74	0.654178	-0.612244
dkgA	EG13015	yqhD-dkgA,dkgA	5	6	genic	3154651	95.54	106.19	0.900644	-0.150972
dld	EG10231	dld,dld	17	-207	genic	2220000	115.25	137.95	0.836632	-0.257335
dnaA	EG10235	dnaAN-recF,dnaAN-recF	41	-300	intergenic	3882052	28.17	96.35	0.29964	-1.7387
dppA	EG10248	dppABCDF	221	-441	intergenic	3706169	106.59	113.57	0.939077	-0.0906854
dsbA	EG11297	rdoA-dsbA,dsbA	13	-243	genic	4041198	0	10.79	0.0848176	-3.55949
dsbG	EG13535	dsbG	8	-298	intergenic	638094	255.92	217.3	1.17691	0.235007
eamA	EG11639	eamA	7	-481	genic	1619642	7.32	52.6	0.155224	-2.68758
ecnA	EG14372	ecnAB	29	153	intergenic	4374493	627.82	1180.92	0.532033	-0.910413
ecnB	EG14345	ecnAB,ecnB	29	-83	intergenic	4374493	44.84	92.02	0.492797	-1.02093
elfA	EG13709	elfA,elfA,elfA	9	-356	genic	996735	2050.89	951.9	2.15331	1.10656
elfG	EG13712	elfDCG-ycbUVF	5	-137	genic	1000893	92.33	126.3	0.73315	-0.44782
emrK	EG13282	emrKY	4	-42	intergenic	2481403	5.66	34.86	0.185722	-2.42878
emrY	EG13283	emrY,emrKY	12	-283	genic	2480481	21.42	17.58	1.20667	0.271036
entD	EG10262	entD,entD,fepA-entD	4	499	genic	608803	106.15	54.46	1.93202	0.950112
eptA	EG11613	eptA	7	205	genic	4333408	72.18	90.51	0.799694	-0.32248
eutS	EG14192	eutSPQTDM	9	-221	intergenic	2574048	78.48	20.13	3.76148	1.9113
evgA	EG11609	evgAS,evgAS	4	-374	intergenic	2481403	21.44	76.98	0.287766	-1.79703
exuT	EG12738	exuT,exuT,exuT,exuT	6	-369	genic	3242757	171.89	247.85	0.694756	-0.525422
fdhD	EG11859	fdhD	7	63	genic	4084102	0	16.22	0.058072	-4.10601
fdoG	EG11858	fdoGHI-fdhE	7	-257	genic	4084102	25.93	48.77	0.541089	-0.886062
feaB	EG13179	feaB	200	-139	intergenic	1445404	4.39	18.04	0.283088	-1.82068
feaR	EG13422	feaR	200	-97	intergenic	1445404	36.38	52.26	0.70184	-0.510786
fepE	EG10297	fes-ybdZ-entF-fepE	7	386	genic	617863	0	77.54	0.0127324	-6.29536
fhuF	EG12595	fhuF,fhuF	13	-48	intergenic	4603734	33.42	102.87	0.331376	-1.59346
fklB	EG12503	fklB	13	-110	intergenic	4426848	382.15	479.22	0.797863	-0.325786
fliC	EG10321	fliC	5	-250	intergenic	2001880	462.37	840.35	0.550746	-0.860541
fliD	EG10841	fliDST,fliDST	5	-16	intergenic	2001880	32.8	43.26	0.763669	-0.38898
ftnB	EG13175	ftnB,ftnB	58	-149	intergenic	1984800	78.48	67.1	1.16711	0.222937
fucA	EG10348	fucAO	19	156	genic	2931554	40.69	73.06	0.562922	-0.828993
gabD	EG11329	gabDTP,gabDTP,csiD-ygaF-gabDTP	9	-150	genic	2789145	45.49	51.34	0.888231	-0.170993
gadE	EG11544	gadE-mdtEF,gadE,gadE,gadE-mdtEF,gadE	226	328	genic	3656717	87.4	25.62	3.32081	1.73154
gadX	EG12243	gadAX,gadXW,gadX	5	-246	intergenic	3664079	15.98	65.59	0.254993	-1.97147
gatA	EG12414	gatZABCD,gatYZABCD	11	-15	genic	2173086	43.66	89.58	0.493045	-1.02021
gcvT	EG11442	gcvTHP	87	-158	intergenic	3048847	66.22	74.12	0.894835	-0.160307
gdhA	EG10372	gdhA	8	-17	intergenic	1840378	49.05	55.36	0.888041	-0.171302
glcA	EG12995	glcA,glcDEFGBA,glcA,glcBA	4	-391	genic	3119692	39.17	28.13	1.37899	0.463613
glnD	EG11411	map-glnD-dapD,glnD	70	-13	intergenic	188663	118.38	129.04	0.918025	-0.123394
glpK	EG10398	glpFKX	7	310	genic	4114935	332.01	493.03	0.674068	-0.569033
gltA	EG10402	gltA,gltA,gltA,gltA	206	-293	intergenic	753984	92.41	94.82	0.974849	-0.0367497
gltB	EG10403	gltBDF	94	-510	intergenic	3352237	31.03	66.71	0.473047	-1.07995
gltB	EG10403	gltBDF	11	-510	genic	3352237	31.03	66.71	0.473047	-1.07995
gltB	EG10403	gltBDF	26	1270	genic	3352237	31.03	66.71	0.473047	-1.07995
gltF	EG11514	gltBDF	42	3688	genic	3359538	43.09	35.36	1.2126	0.278099
gltP	EG10405	gltP,gltP,gltP	139	-180	intergenic	4292324	15.05	25.74	0.600224	-0.736426
glxK	EG13621	ybbY-glxK,gcl-hyi-glxR-ybbVW-allB-ybbY-glxK,glxK	10	-270	genic	540842	5.75	11.8	0.527344	-0.923184
gmk	EG10965	gmk,gmk	9	-48	intergenic	3819403	327.49	270.97	1.20782	0.272402
gor	EG10412	gor,gor	4	286	genic	3644608	43.85	69.98	0.631868	-0.662305
greB	EG11578	greB,greB	14	-51	intergenic	3534783	179.66	283.58	0.63483	-0.655557
groS	EG10600	groSL	65	-203	intergenic	4368508	201.8	69.02	2.89632	1.53422
gspG	EG12886	gspCDEFGHIJKLMO,gspCDEFGHIJKLMO,gspCDEFGHIJKLMO	10	47	genic	3459092	45.15	77.21	0.590078	-0.761022
gspH	EG12887	gspCDEFGHIJKLMO,gspCDEFGHIJKLMO,gspCDEFGHIJKLMO	10	-398	genic	3459092	12.93	66.31	0.206953	-2.27263
gspM	EG12173	gspCDEFGHIJKLMO,gspCDEFGHIJKLMO,gspCDEFGHIJKLMO	6	390	genic	3463494	256.84	204.95	1.25195	0.324182
gspO	EG11359	gspCDEFGHIJKLMO,gspCDEFGHIJKLMO,gspCDEFGHIJKLMO	6	-71	genic	3463494	10675.8	5167.37	2.06579	1.04669
gudX	EG13168	gudPXD	9	-153	genic	2918921	39.33	55.48	0.714058	-0.485887
hcaE	EG13456	hcaEFCBD	7	-446	genic	2666608	29.04	4.97	5.03183	2.33108
hcaR	EG13455	hcaR	7	310	genic	2666608	125.78	83.5	1.50036	0.585304
hchA	EG11755	hchA,hchA	4	-295	intergenic	2033564	123.8	142.89	0.867329	-0.205348
hemB	EG10428	hemB	14	-269	intergenic	389220	33.81	62.43	0.548794	-0.865663
hemH	EG10431	hemH	8	-95	intergenic	497184	102.68	168.56	0.611465	-0.709658
hemN	EG11836	hemN	5	187	genic	4050255	139.14	383.95	0.364047	-1.4578
hfq	EG10438	mutL-miaA-hfq-hflXKC,mutL-miaA-hfq-hflXKC,hfq-hflXKC,miaA-hfq-hflXKC,hfq-hflXKC,hfq-hflXKC,yjeFE-amiB-mutL-miaA-hfq-hflXKC,miaA-hfq-hflXKC,yjeE-amiB-mutL-miaA-hfq-hflXKC,yjeFE-amiB-mutL-miaA-hfq-hflXKC,yjeFE-amiB-mutL-miaA-hfq-hflXKC	8	-12	intergenic	4398299	0	21.89	0.0436872	-4.51665
hofC	EG11798	ppdD-hofBC	15	321	genic	115403	142.47	253	0.564843	-0.824079
holE	EG11505	holE,holE,holE,holE,holE,holE	8	239	intergenic	1923371	399.52	1024.77	0.390458	-1.35676
htpG	EG10461	htpG,htpG,htpG	5	-127	genic	494217	59.77	68.54	0.873886	-0.194484
htpX	EG10462	htpX	5	-6	intergenic	1910606	22.42	30.67	0.739501	-0.435376
htrE	EG11972	ecpD-htrE,htrE,ecpD-htrE,htrE,ecpD-htrE	20	-345	genic	155771	22.84	49.46	0.472453	-1.08176
hupA	EG10466	hupA	41	5	genic	4198309	0	0	1	0
iaaA	EG12407	iaaA-gsiABCD	8	-83	intergenic	865708	13.65	7	1.83125	0.872829
ibpA	EG11534	ibpAB	15	-287	intergenic	3865732	79.62	32.67	2.39442	1.25967
icd	EG10489	icd,icd	6	-201	genic	1194145	94.85	64.88	1.45492	0.540938
ileY	EG31121	ileY,ileY	11	332	intergenic	2783527	86.74	0	87.74	6.45516
ilvL	EG11270	ilvLXG_1G_2MEDA,ilvLXG_1G_2MEDA	42	-63	intergenic	3948282	66.59	0	67.59	6.07874
ilvN	EG10502	ivbL-ilvBN,ivbL-ilvBN-uhpABC	4	196	genic	3848919	22.65	69.73	0.33437	-1.58048
insK	EG40011	insK	6	154	genic	3719375	77.37	63.51	1.21485	0.280779
intD	EG10507	intD	11	336	genic	564865	135.92	522.95	0.261323	-1.9361
iraP	EG11256	iraP,iraP	20	-458	intergenic	400152	0	25.91	0.0371609	-4.75007
ispB	EG10017	ispB	7	-195	intergenic	3331537	33.91	83.5	0.413136	-1.27531
ispD	EG13110	ispDF	17	183	genic	2870329	27.81	76.1	0.373671	-1.42016
ivy	EG13547	ivy,ivy,ivy,ivy	11	-58	intergenic	240285	111.26	85.61	1.29616	0.374238
katG	EG10511	katG	6	-97	intergenic	4131761	30.23	55.82	0.54963	-0.863466
kbaY	EG12768	agaSYBCDI	7	-2	intergenic	3281163	145.47	125.69	1.15613	0.209303
kbl	EG10512	kbl-tdh	80	-163	intergenic	3790737	5.51	5.65	0.978947	-0.0306968
kdgR	EG14018	kdgR,kdgR,kdgR	6	-165	intergenic	1908288	24.97	42.7	0.594279	-0.750787
kdsA	EG10518	ychQA-kdsA,kdsA	8	-398	genic	1266990	15.42	39.55	0.404932	-1.30425
kduI	EG13096	kduI	10	-67	intergenic	2982213	149.64	242.42	0.618848	-0.692343
lepA	EG10529	lepAB	9	-2	intergenic	2705148	32.96	15.03	2.11853	1.08306
lepB	EG10530	lepB,lepAB	8	-121	genic	2703452	20.28	48.56	0.429379	-1.21968
leuL	EG11280	leuLABCD	36	-415	intergenic	84123	0	0	1	0
leuO	EG10531	leuO	36	-245	intergenic	84123	97.66	121.67	0.804272	-0.314245
leuU	EG30050	secG-leuU,leuU,secG-leuU	8	-315	genic	3320495	0	77.74	0.0127	-6.29902
ligB	EG11334	ligB,ligB	9	-210	intergenic	3819403	58.75	128.6	0.461034	-1.11706
livH	EG10538	livKHMGF,livKHMGF	11	430	genic	3593996	21.33	7.3	2.69036	1.4278
livK	EG10540	livKHMGF,livKHMGF	18	-492	genic	3596075	35.63	54.84	0.655981	-0.608273
livM	EG10541	livKHMGF,livKHMGF	11	-493	genic	3593996	5.16	37.05	0.161892	-2.62689
lpxH	EG12666	ppiB-lpxH	9	-44	genic	553207	9.12	28.06	0.348245	-1.52183
lrp	EG10547	lrp	6	-361	intergenic	931457	39.95	54.65	0.735849	-0.442518
lysA	EG10549	lysA	12	-80	intergenic	2977001	260.97	230.27	1.13275	0.179823
lysP	EG11337	lysP	13	-13	intergenic	2246567	35.88	55.21	0.656111	-0.607988
lysR	EG10551	lysR	12	-42	intergenic	2977001	253.54	440.78	0.576169	-0.795436
lysU	EG10553	lysU,lysU	14	-90	intergenic	4352830	108.57	138.12	0.787593	-0.344477
macA	EG13694	macAB	24	-17	intergenic	918441	0	24.24	0.0396197	-4.65764
malI	EG10557	malI	9	419	genic	1696785	25.63	39.44	0.658506	-0.602731
malY	EG10564	malXY	34	7	genic	1698988	28.1	109.55	0.263229	-1.92561
map	EG10570	map-glnD-dapD	7	-10	intergenic	189516	132.67	76.57	1.72322	0.785105
marC	EG11637	marC	32	-44	intergenic	1616976	39.59	101.55	0.395807	-1.33713
marR	EG11435	marRAB	32	-168	intergenic	1616976	30.31	15.55	1.89184	0.919792
mcbA	EG13318	mcbA	8	-117	intergenic	841396	101.03	103.65	0.974964	-0.0365789
mcrB	EG10574	mcrBC,mcrBC	11	258	genic	4577102	105.09	117.63	0.894293	-0.16118
mcrC	EG10575	mcrC,mcrBC	7	-379	genic	4576360	6.3	19.38	0.358194	-1.48119
mdtE	EG12240	gadE-mdtEF,mdtEF,mdtEF,mdtEF,gadE-mdtEF	10	165	genic	3657420	148.01	128.49	1.15075	0.202568
mdtG	EG11343	mdtG	11	-34	intergenic	1114747	59.1	88.2	0.673767	-0.569679
metE	EG10584	metE	8	-32	intergenic	4011044	311.83	185.38	1.67845	0.747132
metR	EG10591	metR,metR	8	-205	intergenic	4011044	82.92	120.52	0.690586	-0.534107
metY	EG30061	metY-yhbC-nusA-infB-rbfA-truB-rpsO-pnp,metY-yhbC-nusA-infB,metY-yhbC-nusA-infB-rbfA-truB-rpsO-pnp,metY,metY-yhbC-nusA-infB-rbfA-truB-rpsO-pnp,metY-yhbC-nusA-infB-rbfA-truB-rpsO-pnp,metY,metY-yhbC-nusA-infB,metY,metY	36	491	genic	3315820	85.61	263.51	0.327436	-1.61072
mglA	EG10592	mglAC,mglBAC	12	482	genic	2236829	47.67	106.72	0.45182	-1.14618
mglB	EG10593	mglBAC	4	-6	intergenic	2238376	13.2	74.47	0.188154	-2.41001
micC	EG31144	micC	11	-78	intergenic	1435067	907.17	434.35	2.08607	1.06079
mltD	EG10246	mltD,mltD	24	-278	genic	234233	198.88	214	0.929674	-0.105203
mntH	EG14157	mntH	162	-194	intergenic	2510922	58.53	92.8	0.634648	-0.655971
mobA	EG11829	mobAB,mobAB	15	0	genic	4040022	11.27	57.81	0.208638	-2.26093
moeA	EG10153	moeAB	8	-121	intergenic	865708	64	49.25	1.29353	0.371316
mreC	EG10609	mreBCD,mreCD,mreBCD,mreBCD	18	-15	intergenic	3398015	41.8	61.26	0.68744	-0.540695
mscL	EG11180	mscL	9	-132	genic	3435914	160.39	197.47	0.813171	-0.29837
msrA	EG11433	msrA	23	-66	intergenic	4440265	453.92	433.96	1.04589	0.0647302
mtfA	EG13377	mtfA	10	413	genic	2042088	107.39	161.04	0.668909	-0.580118
nac	EG14265	nac,nac	75	-147	genic	2059466	9837.93	51.57	187.159	7.54812
nadC	EG11546	nadC	6	-74	intergenic	118719	66.36	121.05	0.551905	-0.857508
nadD	EG13241	leuS-lptE-holA-nadD-cobC	10	-199	genic	669994	112.95	147.49	0.767392	-0.381965
nanA	EG10637	nanATEK-yhcH	134	-100	intergenic	3371698	14.75	60.52	0.256014	-1.9657
nanK	EG12815	nanATEK-yhcH	6	-184	genic	3368556	15.05	0	16.05	4.0045
napB	EG12061	napFDAGHBC-ccmABCDEFGH,napFDAGHBC-ccmABCDEFGH,napFDAGHBC	38	457	intergenic	2296283	29.3	105.21	0.285284	-1.80953
napC	EG12060	napFDAGHBC-ccmABCDEFGH,napFDAGHBC,napFDAGHBC-ccmABCDEFGH	38	-2	intergenic	2296283	32.8	56.08	0.592151	-0.755962
narK	EG10642	narK,narK	6	-300	intergenic	1276880	9.47	53.45	0.192287	-2.37867
narX	EG10646	narXL	6	-39	intergenic	1276880	110.05	116.68	0.943661	-0.0836597
nfrB	EG11739	nfrBA	9	-35	intergenic	592436	53.02	57.42	0.924683	-0.112969
nlpE	EG12137	yaeQJ-nlpE,yaeQJ-nlpE,yaeQJ-nlpE	5	-14	genic	215255	176.16	237.82	0.741814	-0.430871
nrdG	EG12523	nrdG,nrdDG	22	104	genic	4458283	85.06	87.27	0.974963	-0.0365803
nrfF	EG11949	nrfABCDEFG	9	315	genic	4291501	51.5	0	52.5	5.71425
nrfG	EG11950	nrfABCDEFG	9	-65	genic	4291501	209.8	79.3	2.62516	1.3924
nudC	EG11702	nudC-hemE-nfi,nudC-hemE-nfi	10	67	genic	4194993	229.96	270.89	0.849461	-0.23538
nudG	EG14009	nudG,nudG	20	22	genic	1839536	403.93	414.43	0.974725	-0.0369329
nupC	EG11971	nupC	162	-142	intergenic	2510922	60.28	73.09	0.827102	-0.273862
nusA	EG10665	rimP-nusA-infB,metY-yhbC-nusA-infB,metY-yhbC-nusA-infB-rbfA-truB-rpsO-pnp,metY-yhbC-nusA-infB-rbfA-truB-rpsO-pnp	36	-272	genic	3315820	66.45	68.18	0.974993	-0.0365366
nusB	EG10666	nrdR-ribDE-nusB-thiL-pgpA,ribE-nusB-thiL-pgpA	17	411	genic	434772	31.39	64.41	0.495184	-1.01396
ompA	EG10669	ompA,ompA	11	-118	intergenic	1019394	208.97	305.36	0.68537	-0.545045
ompF	EG10671	ompF	20	1	genic	986204	460.06	503.07	0.914675	-0.12867
ompN	EG13375	ompN,ompN,ompN	11	-150	intergenic	1435067	81.38	95.43	0.854298	-0.227188
ompR	EG10672	ompR-envZ,ompR-envZ,ompR-envZ,ompR-envZ	14	-177	intergenic	3534783	100.71	112.72	0.89439	-0.161025
ompT	EG10673	envY-ompT,ompT	12	-332	intergenic	585188	69.1	99.25	0.699252	-0.516116
oppA	EG10674	oppABCDF	8	-171	intergenic	1299035	206	149.19	1.37825	0.462842
oppC	EG10676	oppABCDF	6	-160	genic	1301698	0	14.88	0.0629723	-3.98914
osmB	EG10679	osmB,osmB	9	-145	intergenic	1341497	90.3	30.88	2.86386	1.51796
osmY	EG11391	osmY	6	-335	intergenic	4609084	32.63	55.8	0.592077	-0.756142
pabC	EG11493	pabC-yceG-tmk-holB-ycfH,pabC-yceG-tmk-holB-ycfH,pabC-yceG-tmk-holB-ycfH	14	5	genic	1152528	0	25.05	0.0383877	-4.70321
pdxK	EG12642	pdxK	8	-105	genic	2535364	77.37	119.08	0.652648	-0.615622
pfkB	EG10700	pfkB,pfkB	25	-8	intergenic	1804386	42.53	36.36	1.16515	0.220516
pgaA	EG13865	pgaABCD,pgaABCD	6	223	genic	1091289	89.74	66.97	1.335	0.41684
phoB	EG10728	phoBR	8	-105	intergenic	416261	28.66	127.43	0.230943	-2.11439
phoH	EG11734	phoH,phoH,phoH,phoH	10	-433	genic	1083782	80.47	107.96	0.747706	-0.419458
pinQ	EG13824	pinQ	10	-439	genic	1631207	334.63	354.77	0.94339	-0.0840731
pinR	EG13372	pinR	14	-402	genic	1432100	390.4	434.88	0.897954	-0.155287
pitB	EG12883	pitB	6	-214	intergenic	3134607	35.16	13.53	2.48864	1.31536
pldA	EG10738	pldA	15	-63	intergenic	4002822	68.19	108.84	0.629916	-0.666768
pntA	EG10744	pntAB,pntAB	45	-15	intergenic	1675942	4.3	13.24	0.372191	-1.42588
polA	EG10746	polA	9	433	genic	4045422	11.83	43.68	0.287153	-1.80011
ppc	EG10756	ppc	26	-210	intergenic	4151331	111.86	170.87	0.656659	-0.606783
ppdC	EG11154	ppdAB-ygdB-ppdC-recC	8	-124	genic	2960910	0	0	1	0
pphB	EG13102	pphB	7	-88	intergenic	2857694	60.2	102.94	0.588801	-0.764147
ppiB	EG10758	ppiB-lpxH,ppiB-lpxH	6	-85	intergenic	553745	26.63	68.32	0.398586	-1.32704
prfC	EG12114	prfC,prfC	14	-7	intergenic	4607430	128.53	131.87	0.974863	-0.0367291
prmB	EG12449	prmB-aroC-mepA-yfcAML	12	455	genic	2446007	49.46	123.24	0.406149	-1.29992
pstC	EG10784	pstSCAB-phoU,pstCAB-phoU,pstSCA	10	-21	intergenic	3908442	34.33	105.68	0.331177	-1.59432
pstS	EG10734	pstSCAB-phoU,pstS,pstSCA	8	-52	intergenic	3909600	215.3	285.87	0.754	-0.407363
ptrA	EG10786	ptrA,ptrA-recBD	6	93	genic	2956813	27.38	60.87	0.458704	-1.12437
pyrB	EG10805	pyrLBI,pyrLBI	9	12	genic	4470406	21.13	65.03	0.335151	-1.57712
pyrL	EG11279	pyrLBI,pyrLBI,pyrLBI,pyrLBI	19	-247	intergenic	4470803	97.66	0	98.66	6.62439
queD	EG13120	queD	5	-205	intergenic	2890031	54.03	166.31	0.32891	-1.60423
queF	EG13173	queF	5	443	genic	2923813	147.53	310.69	0.476531	-1.06936
rcsA	EG10820	rcsA	16	-476	genic	2021516	824.02	921.31	0.894515	-0.160823
rep	EG10837	rep	8	-361	genic	3958339	74.98	93.66	0.802662	-0.317135
rfaH	EG10839	rfaH,rfaH	8	420	genic	4022424	498.79	497.92	1.00174	0.00251352
rfbB	EG12412	rfbBDACX	8	297	genic	2110788	0	24.91	0.0385951	-4.69544
rfbC	EG11979	rfbBDACX,rfbACX	27	-48	genic	2108210	437.11	48.48	8.85428	3.14638
rhtA	EG12134	rhtA	7	-272	intergenic	849592	44.54	45.7	0.975161	-0.0362883
rimP	EG11179	rimP-nusA-infB,metY-yhbC-nusA-infB-rbfA-truB-rpsO-pnp,metY-yhbC-nusA-infB,metY-yhbC-nusA-infB-rbfA-truB-rpsO-pnp,metY-yhbC-nusA-infB-rbfA-truB-rpsO-pnp,rimP-nusA-infB,metY-yhbC-nusA-infB-rbfA-truB-rpsO-pnp,metY-yhbC-nusA-infB	9	-109	intergenic	3316137	72.76	119.44	0.612421	-0.707404
rlmF	EG13319	rlmF,ybiN	8	-159	intergenic	841396	305.78	189.7	1.6087	0.6859
rlmM	EG11794	rlmM	27	131	genic	2939134	449.06	430.01	1.0442	0.062396
rluE	EG13447	rluE-nudJ	6	29	genic	1194145	40.32	10.34	3.64374	1.86542
rnlB	EG13201	rnlB,rnlB,rnlA-yfjO	9	38	genic	2765044	1116.41	1163.61	0.959471	-0.0596882
rplU	EG50001	rplU-rpmA	7	-64	intergenic	3331537	42.26	65.03	0.655157	-0.610088
rpmH	EG10892	rpmH-rnpA,rpmH-rnpA,rpmH-rnpA	41	-307	intergenic	3882052	140.26	47.97	2.88462	1.52838
rpoZ	EG10899	rpoZ-spoT-trmH-recG	7	-188	genic	3819941	23.88	24.51	0.975304	-0.0360765
rsd	EG11738	rsd,rsd	10	-162	genic	4194993	82.92	141.79	0.587716	-0.766808
rsmF	EG14023	rsmF	7	-339	genic	1917908	32.05	65.76	0.495057	-1.01433
rutB	EG13858	rutABCDEFG	13	73	genic	1072013	133.17	107.36	1.23819	0.30823
sbcD	EG11094	sbcDC	8	-85	intergenic	416261	136.99	275.49	0.499078	-1.00266
scpB	EG12972	scpA-argK-scpBC	19	76	genic	3062091	0	51.63	0.0190006	-5.71781
sdaA	EG10930	sdaA	6	-239	genic	1894717	53.12	54.5	0.975135	-0.036326
sdhC	EG10933	sdhCDAB-sucABCD	206	-416	intergenic	753984	304.25	121.4	2.49387	1.31839
sdiA	EG10935	sdiA,sdiA,sdiA	109	-115	intergenic	1994971	54.71	74.84	0.734573	-0.445023
secG	EG12095	secG-leuU,secG-leuU,secG	8	32	genic	3320495	158.37	162.49	0.9748	-0.0368224
selC	EG30092	selC,selC	13	195	intergenic	3834440	0	0	1	0
serA	EG10944	serA,serA	67	-73	intergenic	3056505	128.31	186.5	0.689653	-0.536057
shiA	EG20205	shiA	13	-94	intergenic	2051573	50.05	77.03	0.654236	-0.612118
shoB	EG14494	shoB	11	429	genic	2697790	81.38	0	82.38	6.36422
sibA	EG31151	sibA	7	-184	genic	2151149	1014.17	472.97	2.14184	1.09885
sibE	EG31169	sibE	17	106	genic	3193156	139.27	285.78	0.489121	-1.03174
spf	EG30098	spf	74	-85	intergenic	4047837	423.35	1116.9	0.379596	-1.39746
srlR	EG10974	srlR,srlAEBD-gutM-srlR-gutQ	7	155	genic	2827224	170.34	209.72	0.813117	-0.298465
ssuE	EG13708	ssuEADCB	9	0	genic	996735	217.45	258.33	0.842363	-0.247486
stfR	EG13370	lomR_2-stfR-tfaR	37	-142	intergenic	1426931	86.25	120.67	0.717104	-0.479746
sucA	EG10979	sucABCD,sdhCDAB-sucABCD	5	-474	genic	757455	35.29	62.76	0.569166	-0.813079
tauA	EG13300	tauABCD	5	-237	intergenic	384219	27.38	28.09	0.975593	-0.0356488
tdcA	EG10989	tdcABCDEFG	24	-199	intergenic	3265286	49.14	50.42	0.975107	-0.0363676
tdcR	EG10992	tdcR,tdcR,tdcR,tdcR,tdcR,tdcR,tdcR,tdcR,tdcR,tdcR	24	-116	intergenic	3265286	30.1	30.88	0.975533	-0.035737
tfaQ	EG13825	tfaQ,nohA-ydfN-tfaQ	20	46	genic	1632863	45.78	46.97	0.975193	-0.0362407
tfaR	EG13371	lomR_2-stfR-tfaR	21	49	genic	1430484	80.11	82.2	0.97488	-0.0367037
tff	EG31135	rpsB-tsf	7	-196	intergenic	189516	48.47	248.66	0.198149	-2.33534
thiL	EG20227	nrdR-ribDE-nusB-thiL-pgpA,ribE-nusB-thiL-pgpA	17	-86	genic	434772	60.66	228.22	0.268999	-1.89433
thrS	EG11001	thrS-infC-rpmI-rplT-pheMST-ihfA,thrS-infC	100	11	genic	1800583	58.1	101.68	0.575575	-0.796925
tnaA	EG11005	tnaCAB	13	-139	intergenic	3886614	60.52	90.75	0.670518	-0.576653
tnaB	EG11006	tnaCAB	6	36	genic	3888295	63.39	108.39	0.588628	-0.764572
tnaC	EG11276	tnaCAB	13	156	intergenic	3886614	0	0	1	0
tolB	EG11008	tolB-pal-ybgF,tolB-pal-ybgF	14	-16	intergenic	776947	71.38	109.85	0.652954	-0.614946
tomB	EG12429	tomB-hha	17	-125	intergenic	480057	123.05	54.11	2.25095	1.17054
torA	EG11814	torCAD	10	-229	genic	1058250	12.94	15.93	0.82339	-0.280351
torI	EG14411	torI	7	112	genic	2474444	327.97	302.84	1.08271	0.114644
trxB	EG11032	trxB	6	-184	intergenic	931457	143.31	245.05	0.586507	-0.76978
ubiA	EG11370	ubiCA	13	9	genic	4251048	15.1	38.74	0.405133	-1.30353
ugd	EG13407	ugd	5	-136	intergenic	2097773	158.17	260.8	0.607983	-0.717897
uhpA	EG11051	ivbL-ilvBN-uhpABC,uhpABC	4	-170	genic	3848919	0	11.44	0.0803859	-3.63691
uspA	EG11390	uspA,uspA,uspA	8	131	genic	3638265	303.09	544.19	0.557769	-0.842261
uspC	EG12862	uspC,uspC,uspC,uspC,uspC,uspC	7	-182	intergenic	1977595	7529.47	4382.86	1.71777	0.780538
uspG	EG12683	uspG	12	20	genic	641070	199.76	520.27	0.385136	-1.37656
uvrY	EG11140	uvrYC	34	-97	intergenic	1993480	130.44	175.01	0.746776	-0.421253
uxaC	EG12737	uxaCA,uxaCA,uxaCA,uxaCA	6	6	genic	3242757	0	14.36	0.0651042	-3.94111
waaF	EG12210	rfaDFCL,rfaDFCL,rfaDFCL,rfaDFCL	12	403	genic	3793355	62.96	148.58	0.427597	-1.22568
waaG	EG11339	rfaQGPSBIJYZ-waaU,rfaQGPSBIJYZ-waaU	8	418	genic	3804672	29.3	60.12	0.495746	-1.01233
wcaE	EG13573	wcaCDEF-gmd-dcI-nudD-wcaI-cspBGJ-wzxC	75	-384	genic	2128058	8.82	0	9.82	3.29572
wcaF	EG13574	wcaCDEF-gmd-dcI-nudD-wcaI-cspBGJ-wzxC	132	1	genic	2126911	60.04	36.96	1.60801	0.685275
wecH	EG12274	wecH	13	-90	intergenic	3723820	39.71	27.16	1.44567	0.531736
wrbA	EG11540	wrbA-yccJ	32	-197	intergenic	1067128	110.42	67.97	1.61548	0.691967
wza	EG13566	wza-wzb-wzc-wcaAB,wzbc	39	-306	intergenic	2135573	23.13	53.4	0.443566	-1.17278
wzb	EG13567	wza-wzb-wzc-wcaAB,wzbc	51	258	genic	2133864	14.85	30.47	0.503654	-0.989494
wzc	EG13568	wzbc,wza-wzb-wzc-wcaAB	51	-188	genic	2133864	24.38	46.9	0.529854	-0.916334
wzzE	EG11295	rfe-wzzE-rffEDGHCA-wzxE-rffT-wzyE-rffM	5	301	genic	3967355	37.78	32.3	1.16456	0.219791
xapR	EG11146	xapR,xapR	17	-83	intergenic	2520582	7.45	38.21	0.215506	-2.2142
xdhA	EG13049	xdhABC,xdhABC	14	128	genic	2998495	61.28	122.75	0.503273	-0.990588
yadC	EG11678	yadC,yadMLKC	7	-81	genic	151034	58.53	180.14	0.328641	-1.60542
yadM	EG12327	yadMLKC	7	-251	genic	153063	11.57	71.19	0.174124	-2.52181
yaeF	EG12138	yaeF	7	366	genic	216637	335.6	450.9	0.744855	-0.424968
yafC	EG11649	yafC	43	-165	intergenic	231046	223.34	310.45	0.720308	-0.473314
yafD	EG11650	yafDE	43	-76	intergenic	231046	123.45	67.55	1.81546	0.860338
yafK	EG13148	yafK	8	-360	genic	246165	658.32	492.88	1.33498	0.416818
yafN	EG13151	yafNOP,dinB-yafNOP	15	245	genic	252250	0	46.01	0.0212721	-5.5549
yafO	EG13152	dinB-yafNOP,yafNOP	15	-51	genic	252250	0	33.9	0.0286533	-5.12516
yafQ	EG13154	dinJ-yafQ	8	74	genic	246165	47.26	48.48	0.975344	-0.0360176
yafV	EG13334	yafV,yafV	7	-323	genic	240512	68.4	52.63	1.29405	0.371895
yagU	EG13560	yagU	4	-103	intergenic	302112	0	0	1	0
yahA	EG11236	yahA,yahA	5	-82	intergenic	331513	36.32	86.95	0.424332	-1.23673
yaiS	EG13302	yaiS,yaiS,yaiS,yaiS	5	-379	intergenic	384219	47.26	36.36	1.29176	0.369333
yaiY	EG14279	yaiY,yaiY	145	-71	intergenic	398628	128	153.22	0.836467	-0.257619
yaiZ	EG14280	yaiZ,yaiZ,yaiZ,yaiZ	9	230	intergenic	399047	278.54	222.27	1.25203	0.324265
yajD	EG11097	yajD,yajD	5	30	genic	429859	284.14	427.58	0.665313	-0.587894
yajO	EG13611	yajO,xseB-ispA-dxs-yajO	11	153	genic	437206	466.52	617.38	0.75604	-0.403466
ybaL	EG12623	ybaL	31	-194	intergenic	502656	19.65	32.26	0.620866	-0.687646
ybbC	EG11769	rhsD-ybbC-ylbH-ybbD	5	-13	intergenic	526792	0	36.66	0.0265534	-5.23496
ybbW	EG13618	gcl-hyi-glxR-ybbVW-allB-ybbY-glxK	24	36	genic	536893	31.71	9.3	3.17573	1.66709
ybcK	EG13627	ybcK,ybcK,ybcK	15	385	genic	568510	8.63	4.43	1.77348	0.826584
ybcV	EG13638	ybcV	7	486	intergenic	578331	64.16	115.19	0.560806	-0.834427
ybdK	EG13644	ybdK	95	-7	intergenic	606613	47.13	30.22	1.54164	0.624466
ybdR	EG13537	ybdR	12	-241	genic	641070	42.56	60.05	0.713514	-0.486987
ybeQ	EG13647	ybeQ,ybeQ,ybeQ,ybeQ,ybeQ,ybeQ	23	-47	intergenic	675817	7886.29	4716.45	1.67194	0.741522
ybeR	EG13648	ybeR-djlB,ybeR-djlB,ybeR-djlB	23	-117	intergenic	675817	27.93	9.55	2.74218	1.45532
ybeT	EG13650	ybeT	7	-239	genic	678868	59.39	48.75	1.21387	0.279613
ybeU	EG13651	ybeU-djlC,ybeU-djlC	7	137	genic	678868	37.24	76.42	0.493929	-1.01762
ybfC	EG11523	ybfOC	8	-83	genic	734790	11.57	23.73	0.50829	-0.976278
ybgC	EG11110	ybgC-tolQRA,ybgC-tolQRA	23	-120	intergenic	773855	32.55	83.5	0.397041	-1.33264
ybgE	EG12395	ybgE	23	323	intergenic	773855	44.84	0	45.84	5.51854
ybhD	EG13230	ybhD,ybhD,ybhD,ybhD	4	344	genic	799454	345.5	226.87	1.5206	0.604644
ybhH	EG13664	ybhH,ybhH	4	-27	intergenic	799955	6.26	12.85	0.524188	-0.931845
ybhI	EG13665	ybhI	46	21	genic	801131	13.79	37.73	0.381875	-1.38883
ybhM	EG13669	ybhM	6	-127	intergenic	819889	129.26	85.25	1.51026	0.594798
ybjP	EG13685	ybjP	55	-3	intergenic	903693	153.31	144.18	1.06289	0.0879889
ybjQ	EG13686	ybjQ-amiD	55	-123	intergenic	903693	0	0	1	0
ybjX	EG13693	ybjX	24	-98	intergenic	918441	551	606.19	0.909106	-0.13748
ycaC	EG11241	ycaC	4	-186	intergenic	944966	178.73	226.53	0.789918	-0.340226
ycaD	EG11242	ycaD,ycaD	4	-128	intergenic	944966	45.9	47.09	0.975255	-0.036149
ycaK	EG12702	ycaK,ycaK,ycaK	10	328	genic	949219	66.93	57.22	1.16678	0.222534
ycaN	EG13698	ycaN	10	-428	genic	949219	123.29	119.05	1.03532	0.0500748
yccM	EG13234	yccM	11	138	genic	1052447	171.86	302.28	0.569968	-0.811046
ycdT	EG13866	ycdT	13	-412	intergenic	1091687	24.25	79.63	0.313159	-1.67503
ycgB	EG11516	ycgB	6	-244	intergenic	1236708	55.9	57.35	0.97515	-0.0363039
ycgJ	EG13891	ycgJ	54	28	genic	1225851	107.19	128.3	0.836736	-0.257155
ycgV	EG13903	ycgV,ycgV,ycgV,ycgV	6	-367	intergenic	1255542	176.99	155.64	1.1363	0.184344
ycgX	EG14244	ycgX,ycgX	4	148	genic	1212182	0	0	1	0
ychA	EG11251	ychQA-kdsA	8	447	genic	1266990	48.83	50.1	0.975147	-0.0363086
yciZ	EG14460	yciZT	13	-154	genic	1342787	454.63	583.06	0.780108	-0.358254
ydaT	EG13362	ydaSTUVW-rzpR,ydaSTUVW-rzpR,ydaSTUVW-rzpR,ydaSTUVW-rzpR	19	471	genic	1419179	93.51	239.84	0.392418	-1.34954
ydaU	EG13363	ydaSTUVW-rzpR,ydaSTUVW-rzpR,ydaSTUVW-rzpR,ydaSTUVW-rzpR	19	36	genic	1419179	61.47	39.41	1.5459	0.628451
ydcI	EG13752	ydcI,ydcI	19	359	genic	1492736	114.15	87.84	1.29615	0.374233
ydcS	EG13762	ydcSTUV,ydcSTUV-patD	75	-194	intergenic	1509484	23.01	5.9	3.47971	1.79897
ydcX	EG13767	ydcX,ydcX,ydcX	5	311	genic	1515724	75.77	194.35	0.392987	-1.34745
ydcY	EG13768	ydcY	5	52	genic	1515724	281.72	578.07	0.488231	-1.03436
ydcZ	EG13769	ydcZ,yncA-ydcZ	23	-479	genic	1516834	1596.76	2314.61	0.689995	-0.535342
ydeE	EG11640	ydeE,ydeE	7	286	genic	1619642	221.96	210.65	1.05344	0.0751045
ydeP	EG13798	ydeP	50	-53	intergenic	1584563	23.13	35.6	0.65929	-0.601016
ydeQ	EG13799	ydeQ	9	183	genic	1585575	7.2	29.57	0.268237	-1.89842
ydfG	EG12345	ydfG	10	-108	intergenic	1625433	79.42	153.92	0.519107	-0.945897
ydfI	EG13821	ydfI	8	-33	intergenic	1628970	72.19	120.36	0.603082	-0.729574
ydfK	EG13823	ydfK,ydfK	10	111	genic	1631207	56.34	57.81	0.975004	-0.0365196
ydfR	EG13830	essQ-ydfRQP	18	294	genic	1638095	21.13	43.36	0.498873	-1.00326
ydgH	EG13929	ydgH	7	-206	intergenic	1676245	13.95	64.41	0.228558	-2.12937
ydhZ	EG13960	ydhZ,ydhZ	11	1	genic	1753164	31.39	128.83	0.24948	-2.003
ydiB	EG11234	ydiNB-aroD,ydiNB-aroD	5	-19	genic	1771794	7.6	7.8	0.977273	-0.0331669
ydiL	EG13971	ydiL	7	334	genic	1768973	92.33	37.89	2.39985	1.26294
ydiM	EG13972	ydiM,ydiM	7	-122	genic	1768973	32.55	55.67	0.592024	-0.756272
ydiO	EG13974	ydiFO	5	-99	genic	1775121	11.44	23.48	0.50817	-0.976617
ydiP	EG13975	ydiP	7	450	genic	1776875	14.46	14.83	0.976627	-0.0341209
ydiV	EG13981	ydiV	11	-74	intergenic	1790118	27.7	18.95	1.4386	0.524662
ydiY	EG13984	ydiY,ydiY,ydiY	25	-279	intergenic	1804386	182.39	409.91	0.446302	-1.16391
yebQ	EG14019	yebQ,yebQ	6	-12	intergenic	1908288	67.17	68.91	0.975111	-0.036362
yecD	EG12378	yecDE,yecDE,yecDE	10	374	genic	1949230	162.77	131.21	1.23871	0.30884
yecE	EG12379	yecDE,yecDE,yecDE	10	-189	genic	1949230	330.01	289.04	1.14126	0.190623
yecF	EG12861	yecF	34	-362	intergenic	1993480	29.3	180.36	0.167071	-2.58147
yedL	EG13279	yedL,yedL	19	-490	genic	2008134	13.73	70.45	0.206158	-2.27818
yedW	EG14045	yedWV	29	-67	intergenic	2036914	29.43	30.19	0.975633	-0.0355892
yeeD	EG11894	yeeED	9	497	genic	2081980	1243.25	1690.87	0.735429	-0.443342
yeeZ	EG13393	yeeZ,yeeZ	4	-55	intergenic	2087207	55.93	106.58	0.529188	-0.918149
yegH	EG14051	yegH	39	-353	intergenic	2135573	83.23	81.13	1.02557	0.036425
yegL	EG14055	yegLK	7	3	genic	2151149	19.98	20.5	0.975814	-0.035322
yegR	EG14061	yegRZ	7	455	intergenic	2165875	0	21.27	0.0449035	-4.47703
yehE	EG11991	yehE,yehE,yehE	8	20	genic	2190798	23.38	47.97	0.497856	-1.0062
yeiE	EG12105	yeiE,yeiE,yeiE	3	-75	intergenic	2247715	14.95	76.68	0.20533	-2.28399
yeiH	EG12027	yeiH	3	-24	intergenic	2247715	100.45	96.62	1.03923	0.0555201
yejB	EG12038	yejABEF	7	-284	genic	2271917	48.16	55.59	0.868705	-0.203062
yejG	EG12042	yejG,yejG	16	-262	intergenic	2276521	286.61	352.88	0.812733	-0.299146
yejM	EG12049	yejLM	6	382	genic	2282780	247.06	422.48	0.585766	-0.771605
yfaE	EG12360	nrdAB-yfaE,yfaE,yfaE	12	294	intergenic	2346830	646.29	928.32	0.69652	-0.521763
yfbK	EG14095	yfbK,yfbK	21	-110	intergenic	2383854	293.75	305.3	0.962292	-0.0554535
yfbL	EG14096	yfbL,yfbL,yfbL,yfbL,yfbL	21	-28	intergenic	2383854	162.77	55.67	2.88989	1.53101
yfbV	EG14106	yfbV	7	-168	intergenic	2411322	43.37	103.83	0.423257	-1.2404
yfcO	EG14118	yfcUTSRQPO	5	-145	genic	2448216	890.18	1234.21	0.721481	-0.470968
yfcP	EG14119	yfcUTSRQPO	5	396	genic	2448216	48.83	87.67	0.561971	-0.831431
yfdE	EG13284	yfdE	22	25	genic	2487165	69.03	171.15	0.406796	-1.29762
yfdV	EG14144	yfdV	8	-275	genic	2488483	41.85	21.47	1.90699	0.931295
yfeK	EG12644	yfeKS	8	0	genic	2535364	52.74	18.04	2.82248	1.49696
yfeS	EG14160	yfeKS	8	-407	genic	2535364	358.76	634.94	0.565714	-0.821856
yfgF	EG14202	yfgF	15	-223	intergenic	2627183	114.57	144.67	0.793369	-0.333937
yfgG	EG14203	yfgG,yfgG,yfgG,yfgG,yfgG,yfgG,yfgG,yfgG	15	-129	intergenic	2627183	137.34	0	138.34	7.11207
yfgH	EG14204	yfgHI	11	-109	intergenic	2627705	25.4	26.06	0.97561	-0.0356239
yfhL	EG13215	yfhL	11	105	genic	2697790	0	51.83	0.0189286	-5.72329
yfiL	EG12446	yfiL,yfiL,yfiL	6	140	genic	2739522	756.47	720.7	1.04956	0.0697894
yfiR	EG14225	yfiRN,yfiRN,yfiRNB,yfiRN,yfiRN	6	-375	genic	2739522	88.91	260.63	0.343653	-1.54097
yfjI	EG13195	yfjI,yfjI,yfjI,yfjI	10	193	genic	2757200	18.7	28.78	0.661518	-0.596148
yfjL	EG13198	yfjLK	18	465	genic	2762710	85.61	271.88	0.317392	-1.65566
ygaC	EG12201	ygaC	18	-90	intergenic	2798106	229.29	548.92	0.41877	-1.25577
ygaM	EG13285	ygaM	18	-50	intergenic	2798106	134.93	177.99	0.759428	-0.397015
ygaP	EG13288	ygaVP	6	12	genic	2795554	87.9	103.06	0.854315	-0.22716
ygaV	EG13524	ygaVP	6	321	genic	2795554	109.87	135.27	0.813605	-0.297599
ygaZ	EG13528	ygaZH	11	90	genic	2807729	116.12	137.47	0.845815	-0.241586
ygcE	EG13033	yqcE-ygcE	7	466	genic	2900384	8.91	13.72	0.673234	-0.570821
ygcO	EG13122	ygcNOP	8	282	genic	2892223	75.77	129.57	0.58796	-0.766209
ygcP	EG13123	ygcNOP	8	5	genic	2892223	11.44	23.48	0.50817	-0.976617
ygcS	EG13126	ygcS	5	-25	intergenic	2895917	4.93	35.38	0.163002	-2.61704
ygdB	EG11155	ppdAB-ygdB-ppdC-recC	8	268	genic	2960910	0	16.58	0.0568828	-4.13586
ygdH	EG12373	ygdH	8	-14	intergenic	2924316	144.88	213.06	0.681491	-0.553233
ygdR	EG13076	ygdR	5	-21	intergenic	2969272	180.61	277.95	0.651049	-0.619163
ygeG	EG13037	ygeG	7	-465	genic	2988825	13.4	27.49	0.50544	-0.984387
ygeX	EG13054	ygeX	10	-14	intergenic	3005518	203.77	265.57	0.768166	-0.38051
ygfI	EG12974	ygfI	22	306	genic	3064889	124.93	135.72	0.92108	-0.118602
yggP	EG12976	cmtBA-yggPFDC	4	467	genic	3075011	0	26.46	0.0364166	-4.77926
yghG	EG12991	yghG	8	324	genic	3111175	32.08	0	33.08	5.04789
yghS	EG13003	yghSR	11	51	genic	3131928	9.23	28.42	0.347723	-1.52399
yghT	EG13004	yghT,yghT,yghT,yghT,yghT,yghT,yghT	11	-225	genic	3131928	19.02	48.8	0.402008	-1.3147
ygiF	EG11603	ygiF-glnE	5	4	genic	3198983	0	5.19	0.161551	-2.62994
ygiL	EG12363	ygiL,ygiL	52	-193	intergenic	3183243	47.77	24.51	1.9118	0.934931
ygiM	EG12434	htrG-cca,htrG	5	-246	genic	3198983	63.69	87.13	0.734029	-0.44609
ygiN	EG12657	ygiN	6	-96	genic	3171068	899.88	1030.62	0.873267	-0.195505
ygiZ	EG13028	ygiZ	23	340	intergenic	3169893	19.8	20.31	0.976068	-0.0349471
ygjH	EG12719	ygjH,ygjH	9	369	intergenic	3218900	1009.61	568.7	1.77393	0.826952
ygjI	EG12720	ygjI,ygjI	12	364	genic	3224620	32.18	42.45	0.763636	-0.389042
yhaB	EG11173	yhaBC	18	-39	intergenic	3265837	256.36	187.87	1.36263	0.446394
yhaI	EG12748	yhaI,yhaI,yhaI,yhaI	5	39	genic	3250972	73.86	94.73	0.781991	-0.354776
yhbT	EG12789	yhbTS,yhbTS	8	-110	intergenic	3299408	12.56	12.88	0.976945	-0.0336504
yhbU	EG12790	yhbUV,yhbUV,yhbUV	8	-99	intergenic	3299408	33.09	115.44	0.292769	-1.77217
yhbX	EG12793	yhbX	7	357	genic	3319278	97.3	79.03	1.22829	0.296651
yhcA	EG11515	yhcAD-ychE_1,yhcAD-ychE_1,yhcAD-ychE_1	22	-152	intergenic	3359982	29.3	60.12	0.495746	-1.01233
yhcC	EG12809	yhcC,yhcC	44	-165	intergenic	3352237	63.79	58.18	1.0948	0.130661
yhcD	EG12810	yhcAD-ychE_1,yhcAD-ychE_1,yhcAD-ychE_1	8	-136	genic	3360693	157.75	386.16	0.410037	-1.28617
yhdV	EG12833	yhdV	6	-99	intergenic	3416313	29.69	60.93	0.49556	-1.01287
yhfL	EG12907	yhfL,yhfL,yhfL,yhfL	23	-314	genic	3497156	0	120.78	0.00821153	-6.92813
yhfZ	EG12921	yhfZY	5	346	genic	3510020	0	14.93	0.0627746	-3.99367
yhhQ	EG12217	yhhQ	17	32	genic	3607272	79.18	71.09	1.11222	0.153443
yhhZ	EG12946	yhhZ-yrhA-insA-6B-6-insAB-6,yhhZ-yrhA-insA-6B-6-insAB-6	7	382	genic	3580268	16.77	28.68	0.59872	-0.740047
yhiJ	EG12225	yhiJ	10	-397	genic	3631010	0	58.34	0.016852	-5.89093
yhjD	EG12248	yhjD	9	-44	intergenic	3671341	97.52	153.41	0.638042	-0.648278
yhjE	EG12249	yhjE,yhjE,yhjE,yhjE	22	2	genic	3672811	109.62	76.68	1.42405	0.509997
yiaD	EG12271	yiaD,yiaD	9	-461	genic	3714109	149.82	245.94	0.610756	-0.711333
yicJ	EG11686	yicJI	65	-177	intergenic	3834129	61.97	48.9	1.26192	0.335625
yidQ	EG11712	yidQ	15	-19	intergenic	3865732	395.92	345.28	1.14624	0.196909
yieE	EG11722	yieEF	26	-157	genic	3891747	17.58	27.05	0.662389	-0.59425
yieH	EG11725	yieH,yieH	36	-59	intergenic	3894738	148.47	416.37	0.358123	-1.48147
yieP	EG11733	yieP-hsrA	9	-8	intergenic	3939358	19.02	87.84	0.225349	-2.14977
yifB	EG11260	yifB,yifB,yifB,yifB,yifB,yifB	66	255	genic	3947737	60.68	151.19	0.405283	-1.303
yigI	EG11467	yigI	15	-102	intergenic	4002822	42.26	28.9	1.44682	0.532888
yigL	EG11470	pldB-yigL,pldB-yigL	5	5	genic	4008228	74.07	67.55	1.09511	0.13108
yihD	EG11830	yihD	15	-70	genic	4040022	122.08	75.15	1.61628	0.69268
yihL	EG11838	yihLM,yihLM,yihLM,yihLM	4	-55	intergenic	4058415	9.27	133.18	0.076539	-3.70766
yihO	EG11841	yihPO,yihO	59	-15	intergenic	4063804	28.17	57.81	0.496004	-1.01158
yihQ	EG11843	yihQ,yihQ,yihQ	38	150	genic	4067149	22.65	63.09	0.369012	-1.43826
yiiE	EG11854	yiiE,yiiE	6	252	intergenic	4077572	30.95	31.75	0.975573	-0.0356789
yiiF	EG11855	yiiF,yiiF,yiiF,yiiF	7	403	intergenic	4078177	30.1	30.88	0.975533	-0.035737
yijO	EG11913	yijO	8	-278	genic	4146618	46.42	71.45	0.65452	-0.61149
yjaH	EG11917	yjaH	41	-280	genic	4198309	151.54	126.33	1.19799	0.260615
yjbB	EG11919	yjbB	66	-134	intergenic	4225620	56.55	62.16	0.911178	-0.134195
yjbQ	EG11935	yjbQR	391	-251	genic	4268010	47.43	113.54	0.422822	-1.24188
yjcB	EG11937	yjcB	6	287	intergenic	4272777	490.9	479.68	1.02334	0.0332883
yjcC	EG11938	yjcC	31	308	genic	4273802	103.85	85.24	1.21579	0.281898
yjcF	EG11941	yjcF	40	3	genic	4281095	20.39	15.69	1.28161	0.357953
yjcO	EG11951	yjcO,yjcO,yjcO,yjcO	14	-40	intergenic	4295188	9.55	98.02	0.106544	-3.23048
yjeH	EG12470	yjeH	65	-73	intergenic	4368508	199.28	247.51	0.805923	-0.311286
yjeJ	EG12472	yjeJ,yjeJ	10	-198	intergenic	4372455	591.02	963.99	0.613499	-0.704868
yjeM	EG12475	yjeM	17	158	genic	4382020	4.39	36	0.145676	-2.77917
yjfZ	EG12500	yjfZ,yjfZ	9	271	genic	4425174	82.92	153.14	0.54444	-0.877155
yjgH	EG12527	yjgH	19	429	intergenic	4470803	49.94	85.4	0.589583	-0.762232
yjgM	EG12532	yjgM	9	-165	intergenic	4477725	261.59	147.62	1.76686	0.821184
yjgN	EG12533	yjgN,yjgN,yjgN	9	-28	intergenic	4477725	16.52	28.25	0.598974	-0.739434
yjhI	EG12551	yjhIHG	5	-326	genic	4524152	16.71	34.29	0.501842	-0.994695
ykgE	EG13582	ykgEFG,ykgEFG,ykgEFG,ykgEFG	6	-173	intergenic	320659	36.62	75.15	0.494025	-1.01734
ykgH	EG13585	ykgH	7	465	genic	324123	29.56	141.54	0.214396	-2.22165
ykgL	EG14325	ykgL	9	-354	intergenic	310982	115.65	118.66	0.974845	-0.0367547
ymjA	EG14295	ymjA	12	-53	intergenic	1355745	187.58	219.95	0.853496	-0.228543
ynaE	EG13373	ynaE	14	148	genic	1432100	112.69	144.52	0.781267	-0.356112
ynaK	EG14296	ynaK-ydaY,ynaK-ydaY,ynaK-ydaY,ynaK-ydaY	5	-317	genic	1423084	24.97	0	25.97	4.69877
yneK	EG13819	yneK,yneK	6	-10	intergenic	1613777	47.26	36.36	1.29176	0.369333
yneM	EG14395	yneM	5	-37	intergenic	1620633	480.68	352.26	1.36353	0.447345
ynfA	EG13839	ynfA,ynfA,ynfA	43	-36	intergenic	1653733	20.16	41.37	0.49941	-1.0017
ynfB	EG13840	ynfB-speG	43	-99	intergenic	1653733	57.83	39.55	1.4508	0.53685
ynfD	EG13842	ynfD	14	365	intergenic	1655954	43.09	397.85	0.110543	-3.17732
ynfE	EG13843	ynfEFGH-dmsD	14	-139	intergenic	1655954	152.11	209.01	0.729061	-0.455889
ynfF	EG13844	ynfEFGH-dmsD	10	-73	genic	1658507	48.95	72.55	0.67913	-0.558241
ynfG	EG13845	ynfEFGH-dmsD	5	3	genic	1661017	0	0	1	0
ynfK	EG13849	dgsA-ynfK,ynfK,ynfK	17	188	genic	1665055	56.83	97.18	0.58902	-0.763611
yniB	EG13987	yniB	15	-62	intergenic	1807319	1374.9	1461.01	0.941102	-0.0875775
yniC	EG13988	yniC	15	-85	intergenic	1807319	98.54	161.76	0.611575	-0.709398
ynjF	EG14008	ynjF,ynjF,ynjF,ynjF	20	-109	genic	1839536	244.15	196.04	1.24416	0.315176
ynjH	EG14010	ynjH,ynjH,ynjH,ynjH	8	-219	intergenic	1840378	193.18	247.75	0.780623	-0.357302
yobA	EG14029	yobA-yebZY	86	-34	intergenic	1923027	70.32	36.07	1.92393	0.944055
yobB	EG14030	yobB-exoX,yobB-exoX	8	-93	intergenic	1923371	60.2	82.36	0.734165	-0.445824
yobF	EG14382	yobF-cspC,yobF-cspC	151	-244	intergenic	1905859	1236.02	986.34	1.25288	0.32525
yoeB	EG14356	yefM-yoeB	4	282	intergenic	2087207	77.55	159.14	0.490508	-1.02765
yohO	EG14426	yohO	11	20	genic	2213699	1098.69	1628.24	0.674971	-0.567102
yqeB	EG13058	yqeB	11	369	genic	3011892	16.22	24.96	0.663328	-0.592205
yqeH	EG13099	yqeH,yqeH,yqeH,yqeH	19	386	genic	2985944	52.07	10.68	4.54366	2.18386
yqeJ	EG13101	yqeIJ,yqeIJ,yqeIJ,yqeIJ,yqeIJ	25	7	genic	2987333	109.19	14	7.346	2.87696
yqeK	EG13274	yqeK,yqeK,yqeK	7	-443	genic	2988825	154.74	79.38	1.93755	0.954231
yqiC	EG13031	yqiC	52	381	intergenic	3183243	1766.96	371.87	4.74149	2.24534
yraH	EG12773	yraH,yraH,yraH,yraH,yraH,yraH,yraH,yraH	10	3	genic	3285451	180.3	242.79	0.743673	-0.42726
yrhB	EG12948	yrhB,yrhB	5	-185	intergenic	3582597	115.65	47.46	2.40714	1.26732
ytfB	EG12502	ytfB	13	-108	intergenic	4426848	41.27	21.17	1.90663	0.931025
ytfJ	EG12510	ytfJ	10	-152	intergenic	4437437	1187.77	450.9	2.6306	1.39539
ytfK	EG12511	ytfK	10	-173	intergenic	4437437	222.92	359.41	0.621292	-0.686656
ytfP	EG12516	ytfMNP	5	477	intergenic	4446394	134.93	177.99	0.759428	-0.397015
znuA	EG12678	znuA	11	496	genic	1940111	42.39	137.73	0.312766	-1.67685

## Sheet: All Nac RNA-Seq
			RNA-Seq
Symbol	EcoCyc Locus	Operon	TF Induced	WT	FC	Log2 FC
aaeA	EG12823	aaeXAB	113.05	152.23	0.744306	-0.426032
aaeB	EG12822	aaeXAB	63.64	68.73	0.927004	-0.109352
aaeB	EG12822	aaeB	63.64	68.73	0.927004	-0.109352
aaeR	EG12825	aaeR	432.39	385.45	1.12146	0.165384
aaeX	EG12824	aaeXAB	904.8	1127.25	0.802836	-0.316822
aas	EG11679	aas-lplT	33.57	53.23	0.63747	-0.649571
aat	EG11112	aat	18.7	76.75	0.253376	-1.98065
abgA	EG13352	abgABT-ogt	5.03	30.95	0.188732	-2.40559
abgB	EG13351	abgABT-ogt	382.95	402.25	0.952139	-0.070756
abgR	EG13353	abgR	87.02	223.22	0.392561	-1.34901
abgT	EG12853	abgABT-ogt	86.34	132.88	0.652375	-0.616226
abrB	EG13310	abrB	163.7	271.31	0.604825	-0.725409
accA	EG11647	accA	0	42.27	0.0231107	-5.4353
accB	EG10275	accBC	629.82	689.27	0.913874	-0.129932
accC	EG10276	accBC	14.65	25.05	0.600768	-0.735121
accD	EG10217	accD	7.2	7.39	0.977354	-0.0330469
aceA	EG10022	aceBAK	70.72	88.11	0.804848	-0.313212
aceB	EG10023	aceBAK	82.3	122.43	0.674876	-0.567305
aceE	EG10024	pdhR-aceEF-lpdA	66.81	71.09	0.94063	-0.0883011
aceE	EG10024	aceEF	66.81	71.09	0.94063	-0.0883011
aceF	EG10025	aceEF	3.48	25.01	0.172241	-2.5375
aceF	EG10025	pdhR-aceEF-lpdA	3.48	25.01	0.172241	-2.5375
aceK	EG10026	aceBAK	45.54	62.3	0.735229	-0.443734
aceK	EG10026	aceK	45.54	62.3	0.735229	-0.443734
ackA	EG10027	ackA-pta	1293.22	1124.43	1.14998	0.201606
ackA	EG10027	ackA	1293.22	1124.43	1.14998	0.201606
acnA	EG11325	acnA	199.54	298.24	0.670164	-0.577413
acnB	EG12316	acnB	38.06	52.07	0.736009	-0.442205
acpH	EG11095	acpH	317.15	360.25	0.880692	-0.18329
acpP	EG50003	fabG-acpP	55.63	85.61	0.653851	-0.612967
acpP	EG50003	fabDG-acpP	55.63	85.61	0.653851	-0.612967
acpP	EG50003	acpP-fabF	55.63	85.61	0.653851	-0.612967
acpS	EG10247	pdxJ-acpS	17.3	53.26	0.337265	-1.56805
acpS	EG10247	rnc-era-recO-pdxJ-acpS	17.3	53.26	0.337265	-1.56805
acpS	EG10247	acpS	17.3	53.26	0.337265	-1.56805
acpT	EG12221	acpT	190.59	103.52	1.83305	0.874243
acrA	EG11703	acrAB	71.77	45.32	1.57103	0.651709
acrB	EG11704	acrB	52.32	57.97	0.904189	-0.145304
acrB	EG11704	acrAB	52.32	57.97	0.904189	-0.145304
acrD	EG10014	acrD	40.22	60.81	0.666882	-0.584496
acrE	EG10266	acrEF	74	93.45	0.794071	-0.33266
acrF	EG10267	acrEF	53.08	54.46	0.975117	-0.0363524
acrR	EG12116	acrR	946.09	1743.06	0.543038	-0.880876
acs	EG11448	acs-yjcHG	47.11	75.96	0.62513	-0.677772
actP	EG11942	actP	71.91	36.89	1.92425	0.9443
actP	EG11942	acs-yjcHG	71.91	36.89	1.92425	0.9443
ada	EG10029	ada-alkB	37.14	88.91	0.424202	-1.23718
add	EG10030	add	269.74	344.25	0.784185	-0.350733
ade	EG11692	ade	130.57	164.59	0.794553	-0.331785
adhE	EG10031	adhE	39.41	60.66	0.655368	-0.609623
adhP	EG12622	adhP	6.52	26.76	0.270893	-1.8842
adiA	EG11501	adiA	200.55	271.37	0.739986	-0.43443
adiC	EG12462	adiC	54.2	65.71	0.827462	-0.273235
adiY	EG11966	adiY	17.3	35.5	0.50137	-0.996053
adk	EG10032	adk	10.22	83.89	0.132171	-2.91952
adrA	EG11257	adrA	218.56	175.75	1.24221	0.312905
aegA	EG12409	aegA	59.93	81.98	0.734273	-0.445611
aer	EG12955	aer	164.69	306.82	0.538269	-0.8936
aes	EG11101	aes	1057.49	796.12	1.32789	0.409139
afuB	EG14277	insA-2B-2-afuBC-insAB-2	56.83	116.61	0.49171	-1.02412
afuC	EG12340	insA-2B-2-afuBC-insAB-2	138.52	174.42	0.795348	-0.330341
agaA	EG12766	kbaZ-agaVWA	23.76	109.68	0.223708	-2.16031
agaB	EG12769	agaSYBCDI	13.82	28.36	0.504768	-0.986307
agaC	EG12770	agaSYBCDI	24.6	33.65	0.738817	-0.436712
agaD	EG12771	agaSYBCDI	49.94	76.86	0.654251	-0.612083
agaI	EG12772	agaSYBCDI	165.68	35.79	4.53058	2.1797
agaR	EG12762	agaR	252.29	217.1	1.16135	0.2158
agaS	EG12767	agaSYBCDI	199.76	199.1	1.0033	0.0047506
agaV	EG12764	kbaZ-agaVWA	13.91	99.88	0.147799	-2.75829
agaW	EG12765	kbaZ-agaVWA	0	18.04	0.052521	-4.25096
agp	EG10033	agp	1247.3	1067.34	1.16845	0.224594
ahpC	EG11384	ahpCF	724.67	431.71	1.67704	0.745913
ahpF	EG11385	ahpF	42.1	82.06	0.518902	-0.946466
ahpF	EG11385	ahpCF	42.1	82.06	0.518902	-0.946466
aidB	EG11811	aidB	295.96	112.31	2.62077	1.38999
ais	EG13155	ais	76.53	246.76	0.312924	-1.67612
alaA	EG14101	alaA-yfbR	97.42	172.14	0.568442	-0.814916
alaA	EG14101	alaA	97.42	172.14	0.568442	-0.814916
alaC	EG14198	alaC	47.88	60.05	0.800655	-0.320747
alaE	EG13525	alaE	483.42	330.66	1.46059	0.546553
alaS	EG10034	alaS	35.08	33.42	1.04823	0.0679524
alaT	EG30008	rrsA-ileT-alaT-rrlA-rrfA	0	0	1	0
alaU	EG30009	rrsD-ileU-alaU-rrlD-rrfD-thrV-rrfF	0	0	1	0
alaV	EG30010	rrsH-ileV-alaV-rrlH-rrfH	0	0	1	0
alaW	EG30011	alaWX	0	0	1	0
alaX	EG30012	alaWX	0	0	1	0
aldA	EG10035	aldA	105.29	89.24	1.17786	0.236167
aldB	EG12292	aldB	47.12	48.34	0.975274	-0.0361211
alkA	EG11222	alkA	46.59	39.83	1.16556	0.221029
alkB	EG10037	alkB	30.38	0	31.38	4.97177
alkB	EG10037	ada-alkB	30.38	0	31.38	4.97177
allA	EG13615	allA	13.65	56.01	0.256972	-1.96031
allB	EG13619	gcl-hyi-glxR-ybbVW-allB-ybbY-glxK	91.96	34.76	2.59955	1.37826
allC	EG13623	allDC-ylbA	21.33	49.25	0.444378	-1.17014
allD	EG13624	allDC-ylbA	69.06	57.97	1.18806	0.24861
allE	EG13622	allDC-ylbA	75.48	25.81	2.85267	1.51231
allE	EG13622	allE	75.48	25.81	2.85267	1.51231
allR	EG13616	allR	16.16	0	17.16	4.10098
allS	EG13267	allS	71.11	58.37	1.21459	0.280465
alpA	EG12112	alpA	0	0	1	0
alr	EG10001	alr	12.21	81.41	0.160296	-2.64119
alsA	EG11959	alsRBACE	38.7	75	0.522368	-0.93686
alsA	EG11959	alsBACE	38.7	75	0.522368	-0.93686
alsB	EG12458	alsRBACE	14.09	65.03	0.228532	-2.12953
alsB	EG12458	alsBACE	14.09	65.03	0.228532	-2.12953
alsC	EG11958	alsRBACE	87.36	117.21	0.747483	-0.419887
alsC	EG11958	alsBACE	87.36	117.21	0.747483	-0.419887
alsE	EG11957	alsE	66.3	38.87	1.68799	0.755303
alsE	EG11957	alsRBACE	66.3	38.87	1.68799	0.755303
alsE	EG11957	alsBACE	66.3	38.87	1.68799	0.755303
alsK	EG11956	alsK	609.59	269.08	2.26077	1.17682
alx	EG12731	alx	40.94	21	1.90636	0.930823
amiA	EG11823	amiA-hemF	68.19	54.42	1.24847	0.320157
amiB	EG11363	yjeE-amiB-mutL-miaA-hfq-hflXKC	14.78	45.49	0.339428	-1.55882
amiB	EG11363	yjeFE-amiB-mutL-miaA-hfq-hflXKC	14.78	45.49	0.339428	-1.55882
amiC	EG13086	amiC	63.08	113.26	0.560826	-0.834374
amiD	EG13687	ybjQ-amiD	158.66	179.06	0.886704	-0.173475
amn	EG10039	amn	72.49	83.67	0.867958	-0.204303
ampC	EG10040	ampC	69.76	143.14	0.490912	-1.02646
ampD	EG10041	ampDE	0	49.01	0.019996	-5.64414
ampE	EG10042	ampDE	223.59	221.49	1.00944	0.0135531
ampG	EG12183	ampG	58.06	68.73	0.846981	-0.239598
ampH	EG12867	ampH	79.7	75.93	1.04901	0.0690223
amtB	EG11821	glnK-amtB	102.44	126.13	0.813655	-0.29751
amyA	EG11387	amyA	128.48	122.72	1.04656	0.0656505
anmK	EG13942	anmK	95.02	134.05	0.710996	-0.492087
ansA	EG10045	ansA-pncA	71.3	93.11	0.76825	-0.380352
ansB	EG10046	ansB	107.04	135.66	0.790575	-0.339026
ansP	EG13776	ansP	30.76	45.09	0.689087	-0.537243
apaG	EG10047	pdxA-rsmA-apaGH	52.32	107.36	0.492063	-1.02308
apaG	EG10047	apaGH	52.32	107.36	0.492063	-1.02308
apaG	EG10047	surA-pdxA-rsmA-apaGH	52.32	107.36	0.492063	-1.02308
apaG	EG10047	rsmA-apaGH	52.32	107.36	0.492063	-1.02308
apaH	EG10048	surA-pdxA-rsmA-apaGH	547.39	417.2	1.31131	0.391009
apaH	EG10048	rsmA-apaGH	547.39	417.2	1.31131	0.391009
apaH	EG10048	pdxA-rsmA-apaGH	547.39	417.2	1.31131	0.391009
apaH	EG10048	apaGH	547.39	417.2	1.31131	0.391009
apaH	EG10048	apaH	547.39	417.2	1.31131	0.391009
apbE	EG12073	apbE	6.24	19.21	0.358239	-1.48101
aphA	EG11934	aphA	83.09	66.31	1.24929	0.321113
appA	EG10049	appA	20.3	57.27	0.36554	-1.4519
appA	EG10049	appCBA-yccB	20.3	57.27	0.36554	-1.4519
appB	EG11379	appCBA-yccB	11.6	35.69	0.343418	-1.54196
appC	EG11380	appCBA-yccB	34.13	26.27	1.28823	0.365389
appY	EG10050	appY	8.79	45.09	0.21241	-2.23507
apt	EG10051	apt	83.6	61.26	1.35882	0.442352
aqpZ	EG13270	aqpZ	18.94	19.44	0.975538	-0.0357298
araA	EG10052	araBAD	74.56	108	0.693211	-0.528634
araB	EG10053	araBAD	69.76	43.74	1.58158	0.661369
araC	EG10054	araC	22.5	46.17	0.498198	-1.00521
araD	EG10055	araBAD	85.24	116.61	0.733271	-0.447582
araE	EG10056	araE	9.29	23.83	0.414418	-1.27084
araF	EG10057	araFGH	19.98	81.98	0.252832	-1.98375
araG	EG10058	araFGH	204.51	258.93	0.790636	-0.338915
araH	EG10059	araFGH	227.08	308.37	0.73724	-0.439793
araH	EG10059	araH	227.08	308.37	0.73724	-0.439793
araJ	EG10060	araJ	127.95	165.52	0.774381	-0.368884
arcA	EG10061	arcA	27.58	18.87	1.43835	0.524414
arcB	EG10062	arcB	45.13	92.61	0.492789	-1.02096
arcZ	EG31163	arcZ	3595.71	2124.07	1.69251	0.759167
arfA	EG11968	arfA	933.13	4632.52	0.201603	-2.31041
argA	EG10063	argA	98.98	228.5	0.435643	-1.19878
argB	EG10064	argCBH	0	17.41	0.0543183	-4.20242
argC	EG10065	argCBH	157.42	161.52	0.974772	-0.0368628
argD	EG10066	argD	107.98	155.1	0.698142	-0.518407
argE	EG11286	argE	206	99.81	2.05337	1.03799
argF	EG10067	argF	6.56	20.19	0.356772	-1.48693
argG	EG10068	argG	313.91	266.71	1.17631	0.234269
argH	EG11223	argCBH	23.99	14.77	1.58465	0.664168
argI	EG10069	argI	190.22	201.89	0.942481	-0.0854643
argK	EG11445	scpA-argK-scpBC	26.47	40.74	0.658122	-0.603574
argO	EG11159	argO	0	0	1	0
argP	EG10490	argP	191.72	279.92	0.686032	-0.543653
argQ	EG30013	argQ	85.61	87.84	0.974899	-0.0366757
argQ	EG30013	serV-argVYZQ	85.61	87.84	0.974899	-0.0366757
argR	EG10070	argR	5752.37	6031.12	0.953789	-0.0682579
argS	EG10071	argS	76.03	66.31	1.14441	0.1946
argT	EG10072	argT-hisJQMP	8.42	17.28	0.515317	-0.956467
argU	EG30014	argU	599.28	527.02	1.13685	0.185043
argV	EG30015	serV-argVYZQ	0	87.84	0.0112562	-6.47314
argW	EG30016	argW	0	90.18	0.0109673	-6.51065
argX	EG30017	argX-hisR-leuT-proM	0	0	1	0
argY	EG30018	serV-argVYZQ	85.61	0	86.61	6.43646
argZ	EG30019	serV-argVYZQ	0	0	1	0
ariR	EG14290	ycgZ-ymgA-ariR-ymgC	0	0	1	0
ariR	EG14290	ymgA-ariR	0	0	1	0
arnA	EG14091	arnBCADTEF	43.22	85.27	0.512577	-0.96416
arnB	EG14089	arnBCADTEF	75.17	65.26	1.14956	0.201085
arnC	EG14090	arnBCADTEF	40.82	90.74	0.455854	-1.13336
arnD	EG14092	arnBCADTEF	36.99	45.55	0.816112	-0.293161
arnF	EG14094	arnBCADTEF	3951.87	5784.78	0.683204	-0.549611
arnT	EG14093	arnBCADTEF	27.92	61.37	0.463684	-1.10878
aroA	EG10073	serC-aroA	10879.1	210.7	51.3938	5.68352
aroB	EG10074	aroKB-damX-dam-rpe-gph-trpS	12.11	37.26	0.342656	-1.54517
aroC	EG10075	prmB-aroC-mepA-yfcAML	18.21	31.14	0.597698	-0.742512
aroD	EG10076	ydiNB-aroD	8.69	26.73	0.349441	-1.51688
aroE	EG10077	yrdD-rimN-aroE-yrdB	32.2	57.81	0.56453	-0.824878
aroF	EG10078	aroF-tyrA	49.24	94.73	0.524809	-0.930135
aroG	EG10079	aroG	56.34	102.77	0.552568	-0.855776
aroH	EG10080	aroH	283.33	264.85	1.06951	0.0969538
aroK	EG10081	aroKB-damX-dam-rpe-gph-trpS	0	38.87	0.0250815	-5.31723
aroL	EG10082	aroL-yaiA-aroM	213.46	450.9	0.474574	-1.07529
aroM	EG10083	yaiA-aroM	19.45	89.78	0.22527	-2.15027
aroM	EG10083	aroL-yaiA-aroM	19.45	89.78	0.22527	-2.15027
aroP	EG10084	aroP	431.8	610.39	0.707895	-0.498393
arpA	EG11208	arpA	681.22	668	1.01976	0.0282308
arpB_1	EG13983	arpB_1B_2	371.24	113.91	3.2394	1.69573
arpB_2	EG13983	arpB_1B_2	371.24	113.91	3.2394	1.69573
arrS	EG31188	arrS	14712.9	41855.1	0.351534	-1.50826
arsB	EG12236	arsRBC	112.42	94.37	1.18926	0.250068
arsC	EG12237	arsRBC	61.9	63.51	0.975043	-0.0364627
arsR	EG12235	arsRBC	37.24	57.32	0.655693	-0.608908
artI	EG11625	artPIQM	27.02	27.72	0.975627	-0.0355987
artJ	EG11628	artJ	27.02	36.96	0.738145	-0.438023
artM	EG11627	artPIQM	19.71	30.33	0.661028	-0.597217
artP	EG11624	artPIQM	18.09	120.61	0.156977	-2.67137
artQ	EG11626	artPIQM	27.58	18.87	1.43835	0.524414
ascB	EG10085	ascFB	97.15	142.39	0.684497	-0.546884
ascF	EG10086	ascFB	18.09	27.83	0.662157	-0.594754
ascG	EG10087	ascG	45.64	53.52	0.855466	-0.225218
asd	EG10088	asd	53.74	104.15	0.52059	-0.941781
aslA	EG10089	aslA	31.85	73.52	0.440821	-1.18173
aslB	EG10090	aslB	5.33	21.89	0.27654	-1.85444
asmA	EG11361	asmA	46.22	58.37	0.795351	-0.330336
asnA	EG10091	asnA	351.85	381.42	0.922677	-0.116103
asnB	EG10092	asnB	43.55	24.37	1.75601	0.812302
asnC	EG10093	asnC-mioC-mnmG	28.72	132.62	0.222422	-2.16863
asnC	EG10093	asnC-mioC	28.72	132.62	0.222422	-2.16863
asnC	EG10093	asnC	28.72	132.62	0.222422	-2.16863
asnS	EG10094	asnS	207.03	680.69	0.305168	-1.71232
asnT	EG30020	asnT	173.48	1067.92	0.16323	-2.61502
asnU	EG30021	asnU	433.69	355.97	1.21772	0.284184
asnV	EG30022	asnV	520.43	1245.9	0.418181	-1.2578
asnW	EG31120	asnW	346.95	444.97	0.780209	-0.358067
aspA	EG10095	aspA-dcuA	123.86	127.08	0.974859	-0.0367339
aspA	EG10095	aspA	123.86	127.08	0.974859	-0.0367339
aspC	EG10096	aspC	83.02	96.54	0.86139	-0.215261
aspS	EG10097	aspS	14.87	57.22	0.272587	-1.87521
aspT	EG30023	aspT	0	87.84	0.0112562	-6.47314
aspU	EG30024	aspU	171.22	351.35	0.488775	-1.03276
aspV	EG30025	aspV	85.61	175.67	0.490236	-1.02845
asr	EG12149	asr	469.34	634.76	0.739807	-0.434778
astA	EG13998	astCADBE	12.74	6.53	1.8247	0.86766
astB	EG13996	astCADBE	29.43	20.13	1.44013	0.526202
astC	EG13999	astCADBE	26.99	27.7	0.975261	-0.0361393
astD	EG13997	astCADBE	17.83	9.15	1.85517	0.891553
astE	EG13995	astE	20.41	20.94	0.975843	-0.0352788
astE	EG13995	astCADBE	20.41	20.94	0.975843	-0.0352788
atl	EG13254	ybaZ	760.63	572.29	1.32852	0.409825
atoA	EG11670	atoDAEB	0	10.39	0.0877963	-3.5097
atoB	EG11672	atoDAEB	50.07	51.37	0.975177	-0.0362645
atoC	EG11668	atoSC	104.64	82.96	1.25822	0.331382
atoD	EG11669	atoDAEB	99.43	122.42	0.813726	-0.297386
atoE	EG11671	atoDAEB	54.81	76.68	0.71846	-0.47702
atoS	EG11667	atoSC	202.06	240.63	0.840376	-0.250894
atpA	EG10098	atpIBEFHAGDC	76.95	127.2	0.608034	-0.717775
atpA	EG10098	atpBEFHAGDC	76.95	127.2	0.608034	-0.717775
atpB	EG10099	atpBEFHAGDC	234.28	248.66	0.942402	-0.085586
atpB	EG10099	atpIBEFHAGDC	234.28	248.66	0.942402	-0.085586
atpC	EG10100	atpC	47.09	80.52	0.589917	-0.761417
atpC	EG10100	atpIBEFHAGDC	47.09	80.52	0.589917	-0.761417
atpC	EG10100	atpBEFHAGDC	47.09	80.52	0.589917	-0.761417
atpD	EG10101	atpIBEFHAGDC	85.8	63.58	1.34407	0.426608
atpD	EG10101	atpBEFHAGDC	85.8	63.58	1.34407	0.426608
atpE	EG10102	atpBEFHAGDC	27.47	56.36	0.496339	-1.0106
atpE	EG10102	atpIBEFHAGDC	27.47	56.36	0.496339	-1.0106
atpF	EG10103	atpIBEFHAGDC	14	57.44	0.256674	-1.96199
atpF	EG10103	atpBEFHAGDC	14	57.44	0.256674	-1.96199
atpG	EG10104	atpIBEFHAGDC	30.52	39.14	0.785252	-0.348773
atpG	EG10104	atpBEFHAGDC	30.52	39.14	0.785252	-0.348773
atpH	EG10105	atpIBEFHAGDC	0	38	0.025641	-5.2854
atpH	EG10105	atpBEFHAGDC	0	38	0.025641	-5.2854
atpI	EG10106	atpIBEFHAGDC	51.91	53.26	0.97512	-0.0363486
avtA	EG10107	avtA	241.82	210.35	1.1489	0.200253
azoR	EG12695	azoR	261.07	245.54	1.06299	0.0881306
azuC	EG14468	azuC	151.54	233.22	0.651268	-0.618677
bacA	EG11665	bacA	112.27	148.11	0.759641	-0.396611
baeR	EG11618	mdtABCD-baeSR	127.65	196.45	0.651557	-0.618036
baeR	EG11618	baeSR	127.65	196.45	0.651557	-0.618036
baeS	EG11617	mdtABCD-baeSR	23.48	48.17	0.497865	-1.00617
baeS	EG11617	baeSR	23.48	48.17	0.497865	-1.00617
bamA	EG12676	bamA	92.12	136.21	0.678668	-0.559223
bamA	EG12676	bamA-hlpA-lpxD-fabZ-lpxAB-rnhB-dnaE	92.12	136.21	0.678668	-0.559223
bamB	EG14208	bamB-der	22.37	57.37	0.400377	-1.32057
bamC	EG10658	bamC	12.74	32.67	0.408078	-1.29308
bamC	EG10658	dapA-nlpB	12.74	32.67	0.408078	-1.29308
bamD	EG14222	bamD	687.8	916.46	0.750768	-0.41356
bamE	EG10952	smpA	212.03	197.76	1.0718	0.100029
barA	EG11367	barA	86.08	122.66	0.704189	-0.505966
basR	EG11615	basRS	0	0	1	0
basS	EG11614	basRS	422.57	260.13	1.62207	0.697832
basS	EG11614	basS	422.57	260.13	1.62207	0.697832
bax	EG11360	bax	135.84	196.76	0.69195	-0.531261
bcp	EG10108	bcp	195.94	244.12	0.803443	-0.315732
bcr	EG11419	bcr	487.08	1323.17	0.368593	-1.4399
bcsA	EG12260	bcsABZC	22.65	46.48	0.498104	-1.00548
bcsB	EG12259	bcsBZ	50.71	69.37	0.73483	-0.444517
bcsB	EG12259	bcsABZC	50.71	69.37	0.73483	-0.444517
bcsC	EG12257	bcsABZC	36.05	42.83	0.845311	-0.242445
bcsE	EG12263	bcsEFG	96.45	107.56	0.89766	-0.155759
bcsF	EG12264	bcsEFG	68.67	35.23	1.92299	0.943353
bcsG	EG12265	bcsEFG	39.24	56.36	0.701534	-0.511415
bcsQ	EG12261	bcsQ	43.77	44.91	0.975169	-0.0362761
bcsZ	EG12258	bcsBZ	23.82	6.11	3.49086	1.80358
bcsZ	EG12258	bcsABZC	23.82	6.11	3.49086	1.80358
bdcA	EG12528	bdcA	313.91	426.27	0.737028	-0.440208
bdcR	EG12529	bdcR	44.39	125.25	0.359525	-1.47584
bdm	EG14301	bdm-sra	0	31.31	0.0309502	-5.01391
betA	EG10109	betIBA	11.84	20.24	0.60452	-0.726139
betA	EG10109	betA	11.84	20.24	0.60452	-0.726139
betB	EG10110	betIBA	26.85	27.55	0.975482	-0.0358134
betI	EG10111	betIBA	22.42	34.51	0.659533	-0.600484
betT	EG10112	betT	58.34	83.13	0.705337	-0.503615
bfd	EG11181	bfd-bfr	0	69.37	0.0142106	-6.13689
bfr	EG10113	bfr	525.16	524.63	1.00101	0.00145387
bfr	EG10113	bfd-bfr	525.16	524.63	1.00101	0.00145387
bglA	EG13079	bglA	96.14	75.15	1.27564	0.351221
bglB	EG10114	bglGFB	18.66	57.44	0.336413	-1.57169
bglF	EG10115	bglGFB	270.28	522.21	0.518492	-0.947607
bglG	EG10116	bglGFB	7.88	32.32	0.266507	-1.90776
bglH	EG11364	bglH-yieLK	24.46	29.28	0.840819	-0.250133
bglJ	EG12594	yjjQ-bglJ	9.72	179.56	0.0593708	-4.0741
bglX	EG12013	bglX	120.48	44.15	2.69059	1.42792
bhsA	EG13436	ycfR	127.75	288.37	0.444932	-1.16834
bhsA	EG13436	bhsA	127.75	288.37	0.444932	-1.16834
bioA	EG10117	bioA	25.55	62.92	0.415363	-1.26756
bioB	EG10118	bioBFCD	120.32	110.45	1.08856	0.122421
bioC	EG10119	bioBFCD	17.44	71.57	0.254099	-1.97653
bioD	EG10120	bioBFCD	77.78	129.68	0.602847	-0.730137
bioF	EG10121	bioBFCD	28.54	58.56	0.49597	-1.01167
bioH	EG10122	bioH	282.15	464.93	0.607709	-0.718547
birA	EG10123	murB-birA	40.94	133.03	0.312915	-1.67616
bisC	EG10124	bisC	64.96	60.85	1.06645	0.0928178
blc	EG12474	blc	469.1	1127.25	0.416663	-1.26305
blr	EG14389	blr	52.32	53.68	0.975128	-0.0363365
bolA	EG10125	bolA	725.55	574.26	1.26299	0.336848
borD	EG13637	borD	44.84	69.02	0.65467	-0.61116
brnQ	EG12168	brnQ-proY	49.94	40.99	1.21315	0.278753
bsmA	EG12489	bsmA	159.81	143.47	1.1131	0.154587
bssR	EG13479	bssR	291.84	457.94	0.638079	-0.648193
bssS	EG14335	bssS	180.96	79.57	2.25841	1.17531
btuB	EG10126	btuB-murI	75.03	95.31	0.78943	-0.341117
btuC	EG10127	btuCED	47.04	55.16	0.855413	-0.225307
btuD	EG10128	btuCED	35.16	27.05	1.28913	0.366394
btuE	EG10129	btuCED	71.65	36.76	1.92399	0.944104
btuF	EG12334	mtn-btuF-yadS	32.92	84.44	0.397004	-1.33278
btuR	EG10130	yciK-btuR	22.31	91.55	0.251864	-1.98928
cadA	EG10131	cadA	107.41	147.99	0.727633	-0.458718
cadA	EG10131	cadBA	107.41	147.99	0.727633	-0.458718
cadB	EG10132	cadBA	24.69	55.73	0.452847	-1.1429
cadC	EG10133	cadC	68.53	180.18	0.383762	-1.38172
caiA	EG11560	caiTABCDE	0	11.83	0.0779423	-3.68145
caiB	EG11559	caiTABCDE	10.82	16.66	0.669309	-0.579255
caiC	EG11558	caiTABCDE	29.69	56.58	0.532998	-0.907799
caiC	EG11558	caiCDE	29.69	56.58	0.532998	-0.907799
caiD	EG11557	caiTABCDE	25.16	25.81	0.975755	-0.0354087
caiD	EG11557	caiCDE	25.16	25.81	0.975755	-0.0354087
caiE	EG12608	caiCDE	412.71	1235.96	0.334457	-1.58011
caiE	EG12608	caiE	412.71	1235.96	0.334457	-1.58011
caiE	EG12608	caiTABCDE	412.71	1235.96	0.334457	-1.58011
caiF	EG13451	caiF	532.7	649.02	0.821052	-0.284455
caiT	EG11561	caiTABCDE	4.35	8.93	0.538771	-0.892255
can	EG12319	can	2187.43	3060.4	0.714846	-0.484295
carA	EG10134	carAB	22.95	41.2	0.567536	-0.817217
carB	EG10135	carAB	32.74	69.27	0.480148	-1.05845
carB	EG10135	carB	32.74	69.27	0.480148	-1.05845
cas1	EG13114	casABCDE12	28.72	14.74	1.88818	0.916999
cas1	EG13114	casDE-ygbTF	28.72	14.74	1.88818	0.916999
cas2	EG12845	ygbF	46.26	0	47.26	5.56255
cas2	EG12845	casDE-ygbTF	46.26	0	47.26	5.56255
cas2	EG12845	casABCDE12	46.26	0	47.26	5.56255
cas3	EG12634	cas3	27.19	58.33	0.475139	-1.07358
casA	EG13119	casABCDE12	30.58	49.3	0.627833	-0.671547
casB	EG13118	casABCDE12	27.3	28.01	0.975526	-0.0357483
casC	EG13117	casABCDE12	30.18	142.45	0.217358	-2.20186
casD	EG13116	casABCDE12	68.36	90.18	0.760693	-0.394614
casD	EG13116	casDE-ygbTF	68.36	90.18	0.760693	-0.394614
casE	EG13115	casABCDE12	0	33.82	0.0287191	-5.12184
casE	EG13115	casDE-ygbTF	0	33.82	0.0287191	-5.12184
cbl	EG14264	cbl	187.16	384.05	0.488664	-1.03309
cbpA	EG12193	cbpAM	28.63	29.37	0.975634	-0.0355884
cbpM	EG12194	cbpAM	172.34	663.09	0.261019	-1.93777
cbrA	EG11714	cbrA	37.14	57.16	0.655777	-0.608722
cbrB	EG11726	cbrB	169.03	448.01	0.378678	-1.40096
cbrB	EG11726	cbrBC	169.03	448.01	0.378678	-1.40096
cbrC	EG11727	cbrBC	11.21	11.5	0.9768	-0.0338649
cbrC	EG11727	cbrC	11.21	11.5	0.9768	-0.0338649
cbtA	EG13389	yeeRSTU-cbtA-yeeW	1195.37	1713.41	0.697832	-0.519049
cca	EG10136	htrG-cca	63.85	109.18	0.588582	-0.764684
ccmA	EG12059	ccmABCDEFGH	0	32.52	0.0298329	-5.06695
ccmA	EG12059	napFDAGHBC-ccmABCDEFGH	0	32.52	0.0298329	-5.06695
ccmB	EG12058	ccmABCDEFGH	9.94	20.4	0.511215	-0.967998
ccmB	EG12058	napFDAGHBC-ccmABCDEFGH	9.94	20.4	0.511215	-0.967998
ccmC	EG12057	ccmABCDEFGH	0	36.66	0.0265534	-5.23496
ccmC	EG12057	napFDAGHBC-ccmABCDEFGH	0	36.66	0.0265534	-5.23496
ccmD	EG12169	ccmABCDEFGH	0	0	1	0
ccmD	EG12169	napFDAGHBC-ccmABCDEFGH	0	0	1	0
ccmE	EG12055	ccmABCDEFGH	27.47	42.27	0.657962	-0.603925
ccmE	EG12055	napFDAGHBC-ccmABCDEFGH	27.47	42.27	0.657962	-0.603925
ccmF	EG12054	ccmABCDEFGH	3.39	13.92	0.294236	-1.76495
ccmF	EG12054	napFDAGHBC-ccmABCDEFGH	3.39	13.92	0.294236	-1.76495
ccmG	EG12053	ccmABCDEFGH	11.81	24.24	0.507528	-0.978441
ccmG	EG12053	napFDAGHBC-ccmABCDEFGH	11.81	24.24	0.507528	-0.978441
ccmH	EG12052	napFDAGHBC-ccmABCDEFGH	68.86	109.19	0.633996	-0.657455
ccmH	EG12052	ccmH	68.86	109.19	0.633996	-0.657455
ccmH	EG12052	ccmABCDEFGH	68.86	109.19	0.633996	-0.657455
cdaR	EG12335	cdaR	278.94	303.71	0.91871	-0.122319
cdd	EG10137	cdd	67.04	53.5	1.24844	0.320127
cdh	EG10138	cdh	584.22	742.55	0.787062	-0.345451
cdsA	EG10139	cdsA	30.73	86.71	0.36176	-1.46689
cedA	EG13992	cedA	0	55.67	0.017646	-5.82451
cfa	EG11531	cfa	218.02	306.09	0.713211	-0.487599
chaA	EG11753	chaA	149.69	227.29	0.660082	-0.599284
chaB	EG12402	chaBC	57.07	29.28	1.91777	0.939428
chaC	EG12403	chaC	1307.06	1457.65	0.896761	-0.157205
chaC	EG12403	chaBC	1307.06	1457.65	0.896761	-0.157205
chbA	EG10142	chbBCARFG	0	38.54	0.0252908	-5.30524
chbB	EG10140	chbBCARFG	0	0	1	0
chbC	EG10141	chbBCARFG	29.1	34.84	0.839844	-0.251807
chbF	EG10144	chbBCARFG	0	10	0.0909091	-3.45943
chbG	EG12198	chbBCARFG	26.37	36.07	0.738333	-0.437657
chbG	EG12198	chbG	26.37	36.07	0.738333	-0.437657
chbR	EG10143	chbBCARFG	15.64	8.02	1.84479	0.883456
cheA	EG10146	motAB-cheAW	43.61	37.86	1.14797	0.199081
cheB	EG10147	tar-tap-cheRBYZ	18.83	12.88	1.42867	0.514677
cheR	EG10148	tar-tap-cheRBYZ	7.66	86.41	0.0990733	-3.33536
cheW	EG10149	motAB-cheAW	39.24	40.26	0.975279	-0.0361134
cheW	EG10149	cheW	39.24	40.26	0.975279	-0.0361134
cheY	EG10150	tar-tap-cheRBYZ	0	0	1	0
cheZ	EG10151	tar-tap-cheRBYZ	10.22	0	11.22	3.488
chiA	EG11237	chiA	127.24	155.66	0.818588	-0.288791
chiP	EG13659	ybfMN	65.59	52.88	1.23589	0.305556
cho	EG13993	cho	37.12	106.63	0.354176	-1.49746
chpA	EG11249	mazEFG	235.43	362.33	0.650731	-0.619867
chpA	EG11249	relA-mazEF	235.43	362.33	0.650731	-0.619867
chpB	EG12096	chpSB	18.78	38.54	0.500253	-0.99927
chpR	EG10571	relA-mazEF	158.85	190.14	0.836298	-0.257911
chpR	EG10571	mazEFG	158.85	190.14	0.836298	-0.257911
chpS	EG11250	chpSB	0	80.52	0.0122669	-6.34908
cirA	EG10155	cirA	138.99	227.49	0.612675	-0.706807
citC	EG13645	citCDEFXG	68.47	159.67	0.432377	-1.20964
citD	EG13543	citCDEFXG	66.59	22.77	2.8435	1.50767
citE	EG13542	citCDEFXG	79.77	193.45	0.415377	-1.26751
citF	EG13541	citCDEFXG	17.2	26.47	0.662541	-0.593918
citG	EG13539	citCDEFXG	67.5	130.81	0.519687	-0.944284
citT	EG13538	citT	40.53	55.44	0.735826	-0.442564
citX	EG13540	citCDEFXG	131.36	306.32	0.430691	-1.21527
clcA	EG12331	clcA	9.27	38.05	0.262996	-1.92689
clcB	EG13848	clcB	907.27	887.81	1.02189	0.0312462
cld	EG13406	cld	33.6	75.84	0.450286	-1.15109
clpA	EG10156	clpA	46.32	65.35	0.713188	-0.487646
clpB	EG10157	clpB	40.98	65.69	0.62948	-0.667768
clpP	EG10158	clpPX	21.13	108.39	0.202304	-2.30541
clpS	EG14241	clpS	41.07	21.07	1.90621	0.930705
clpX	EG10159	clpX-lon	46.53	68.96	0.679388	-0.557692
clpX	EG10159	clpPX	46.53	68.96	0.679388	-0.557692
cls	EG11608	cls-yciU	58.66	92.59	0.637461	-0.64959
cmk	EG11265	cmk-rpsA	115.65	148.32	0.781208	-0.356221
cmoA	EG14033	yecN-cmoAB	35.44	90.91	0.396475	-1.3347
cmoB	EG14034	yecN-cmoAB	13.56	132.21	0.109301	-3.19362
cmr	EG13696	cmr	26.73	0	27.73	4.79338
cmtA	EG11792	cmtBA-yggPFDC	4.75	0	5.75	2.52356
cmtB	EG11791	cmtBA-yggPFDC	29.69	15.23	1.89094	0.919106
cnu	EG14303	cnu	30.52	31.31	0.975549	-0.0357132
coaA	EG10922	coaA	346.59	412.49	0.840625	-0.250466
coaD	EG11190	kdtA-coaD	68.67	140.91	0.490945	-1.02637
coaE	EG12312	coaE-yacFG	0	65.35	0.0150716	-6.05202
cobB	EG13443	nagK-cobB	9.04	9.28	0.976654	-0.034081
cobC	EG13240	leuS-lptE-holA-nadD-cobC	96.94	110.51	0.878307	-0.187203
cobC	EG13240	cobC	96.94	110.51	0.878307	-0.187203
cobS	EG12150	cobUST	0	0	1	0
cobT	EG12151	cobUST	18.31	50.1	0.377886	-1.40398
cobT	EG12151	cobT	18.31	50.1	0.377886	-1.40398
cobU	EG13238	cobUST	0	12.39	0.0746826	-3.74308
codA	EG11326	codBA	220.76	258.11	0.855853	-0.224565
codB	EG11327	codBA	20.93	21.47	0.975968	-0.0350942
cof	EG13216	cof	177.08	189.94	0.932649	-0.100594
copA	EG13246	copA	26.32	21.6	1.20885	0.273635
corA	EG11463	corA	173.29	170.69	1.01514	0.0216837
cpdA	EG12187	nudF-yqiB-cpdA-yqiA-parE	23.88	8.17	2.7132	1.43999
cpdB	EG10160	cpdB	149.2	177.44	0.841739	-0.248554
cpsB	EG10161	wcaCDEF-gmd-dcI-nudD-wcaI-cspBGJ-wzxC	27.52	32.95	0.840059	-0.251438
cpsG	EG10162	wcaCDEF-gmd-dcI-nudD-wcaI-cspBGJ-wzxC	52.89	69.07	0.769088	-0.378779
cpxA	EG10163	cpxRA	268.67	196.9	1.36266	0.446424
cpxA	EG10163	cpxA	268.67	196.9	1.36266	0.446424
cpxP	EG11872	cpxP	1052.64	1134	0.928317	-0.10731
cpxR	EG10020	cpxRA	18.86	116.11	0.169584	-2.55993
crcB	EG12209	crcB	343.34	634.08	0.542199	-0.883105
creA	EG11217	creABC	69.54	142.69	0.490918	-1.02645
creA	EG11217	creABCD	69.54	142.69	0.490918	-1.02645
creB	EG11218	creABCD	28.66	0	29.66	4.89045
creB	EG11218	creABC	28.66	0	29.66	4.89045
creC	EG10730	creABC	50.89	166.12	0.310495	-1.68736
creC	EG10730	creABCD	50.89	166.12	0.310495	-1.68736
creD	EG10145	creABCD	68.21	49.99	1.35732	0.440766
creD	EG10145	creD	68.21	49.99	1.35732	0.440766
crl	EG11092	crl	16.4	33.65	0.502164	-0.993768
crp	EG10164	crp	52.07	117.53	0.447735	-1.15928
crr	EG10165	ptsHI-crr	90.48	92.83	0.974955	-0.0365929
crr	EG10165	crr	90.48	92.83	0.974955	-0.0365929
csdA	EG13082	csdAE	38.26	39.26	0.975161	-0.036287
csdE	EG13083	csdAE	207.86	258.96	0.803431	-0.315753
csdL	EG13084	csdL	481.95	393.91	1.22294	0.29035
csgA	EG11489	csgBAC	404.78	103.83	3.87084	1.95265
csgB	EG12621	csgBAC	43.37	0	44.37	5.47151
csgC	EG13414	csgC	39.59	20.31	1.90474	0.929594
csgC	EG13414	csgBAC	39.59	20.31	1.90474	0.929594
csgD	EG13410	csgDEFG	0	31.17	0.0310849	-5.00764
csgE	EG13411	csgDEFG	0	0	1	0
csgF	EG13412	csgDEFG	0	32.44	0.0299043	-5.0635
csgG	EG13413	csgG	23.71	81.1	0.300974	-1.73229
csgG	EG13413	csgDEFG	23.71	81.1	0.300974	-1.73229
csiD	EG13523	csiD-ygaF-gabDTP	6.74	20.75	0.355862	-1.49061
csiE	EG13418	csiE	195.55	300.95	0.650936	-0.619413
csiR	EG12386	csiR	12736.8	11802.9	1.07912	0.109852
cspA	EG10166	cspA	92.85	95.26	0.974964	-0.0365797
cspB	EG12203	cspB	0	31.31	0.0309502	-5.01391
cspC	EG12204	yobF-cspC	156.96	128.83	1.21667	0.282936
cspC	EG12204	cspC	156.96	128.83	1.21667	0.282936
cspD	EG11111	cspD	644.56	811.62	0.794418	-0.33203
cspE	EG12179	cspE	31.39	354.28	0.0911675	-3.45534
cspF	EG12205	cspF	680.88	857.34	0.794417	-0.332031
cspG	EG14243	cspG	61.9	63.51	0.975043	-0.0364627
cspH	EG14281	cspH	216.64	539.81	0.402433	-1.31318
cspI	EG13877	cspI	0	0	1	0
csrA	EG11447	csrA	425.3	1054.52	0.403877	-1.30801
csrB	EG31119	csrB	16024.8	22288.3	0.71899	-0.475957
csrD	EG10018	csrD	71.32	90.6	0.78952	-0.340953
cstA	EG10167	cstA	34.43	44.96	0.770888	-0.375407
cueO	EG12318	cueO	12.75	30.53	0.436093	-1.19729
cueR	EG13256	cueR	1955.02	2188.18	0.893494	-0.162469
curA	EG13772	curA	63.51	149.87	0.427587	-1.22571
cusA	EG12367	cusCFBA	8.39	30.12	0.301735	-1.72864
cusB	EG14235	cusCFBA	21.54	44.21	0.498562	-1.00415
cusC	EG14233	cusCFBA	19.19	118.14	0.169465	-2.56095
cusF	EG14234	cusCFBA	79.18	20.31	3.76255	1.91171
cusR	EG13851	cusRS	67.46	39.55	1.68829	0.755559
cusS	EG13642	cusRS	137.05	131.24	1.04394	0.0620322
cutA	EG12177	cutA	0	59.85	0.0164339	-5.92719
cutC	EG12956	cutC	35.3	9.05	3.61194	1.85277
cvpA	EG10169	cvpA-purF-ubiX	13.48	27.66	0.505234	-0.984977
cvrA	EG13896	cvrA	98.67	124.6	0.793551	-0.333605
cyaA	EG10170	cyaA	370.11	382.39	0.96797	-0.0469659
cyaR	EG31153	cyaR	227.31	155.48	1.45904	0.545016
cyaY	EG11653	cyaY	533.94	589.96	0.905205	-0.143683
cybB	EG10172	cybB	62.07	140.11	0.446956	-1.16179
cybC	EG50008	cybC	576.36	628.3	0.917464	-0.124277
cycA	EG12504	cycA	60.65	43.08	1.39859	0.483977
cydA	EG10173	cydAB	29.41	25.86	1.13217	0.179086
cydB	EG10174	cydAB	40.48	23.73	1.67732	0.746154
cydC	EG10012	cydDC	49.77	43.2	1.14864	0.19993
cydC	EG10012	cydC	49.77	43.2	1.14864	0.19993
cydD	EG11405	cydDC	41.04	53.59	0.770104	-0.376874
cynR	EG11421	cynR	43.95	105.21	0.423218	-1.24053
cynS	EG10175	cynTSX	14	71.8	0.206044	-2.27898
cynS	EG10175	cynTS	14	71.8	0.206044	-2.27898
cynT	EG10176	cynTS	169.8	225.45	0.75425	-0.406885
cynT	EG10176	cynTSX	169.8	225.45	0.75425	-0.406885
cynX	EG10177	cynTSX	747.68	433.33	1.72376	0.785558
cyoA	EG10178	cyoABCDE	83.44	49.94	1.65764	0.729128
cyoB	EG10179	cyoABCDE	36.4	50.93	0.7202	-0.47353
cyoC	EG10180	cyoABCDE	53.59	32.99	1.60606	0.683526
cyoD	EG10181	cyoABCDE	0	61.49	0.0160026	-5.96555
cyoE	EG10182	cyoE	29.59	53.14	0.565017	-0.823635
cyoE	EG10182	cyoABCDE	29.59	53.14	0.565017	-0.823635
cysA	EG10183	cysPUWAM	6	30.8	0.220126	-2.1836
cysB	EG10184	cysB	101.42	208.11	0.48979	-1.02976
cysC	EG10185	cysDNC	119.66	167.41	0.716466	-0.48103
cysC	EG10185	cysC	119.66	167.41	0.716466	-0.48103
cysD	EG10186	cysDNC	14.5	66.97	0.228042	-2.13263
cysE	EG10187	cysE	176.43	164.56	1.0717	0.0998958
cysG	EG10188	cysG	67.17	59.07	1.13484	0.182492
cysG	EG10188	nirBDC-cysG	67.17	59.07	1.13484	0.182492
cysH	EG10189	cysJIH	26.91	0	27.91	4.80271
cysH	EG10189	cysH	26.91	0	27.91	4.80271
cysI	EG10190	cysJIH	7.7	11.84	0.67757	-0.561558
cysJ	EG10191	cysJIH	21.97	26.3	0.841392	-0.24915
cysK	EG10192	cysK	74.6	201.79	0.372799	-1.42353
cysM	EG10193	cysPUWAM	7.23	14.83	0.519899	-0.943697
cysN	EG10194	cysDNC	18.47	18.95	0.97594	-0.035136
cysP	EG10195	cysPUWAM	19.45	19.95	0.976134	-0.0348494
cysQ	EG10043	cysQ	160.13	73.02	2.17684	1.12224
cysS	EG10196	cysS	38.05	48.8	0.784137	-0.350823
cysT	EG30026	glyW-cysT-leuZ	0	0	1	0
cysT	EG30026	cysT-leuZ	0	0	1	0
cysU	EG10197	cysPUWAM	7.9	0	8.9	3.15381
cysW	EG10198	cysPUWAM	30.1	54.05	0.564941	-0.823828
cysZ	EG10003	cysZ	233.58	408.29	0.573139	-0.803043
cytR	EG10200	cytR	44.98	92.29	0.492872	-1.02072
dacA	EG10201	dacA	32.63	61.38	0.539115	-0.891335
dacB	EG10202	dacB	82.75	70.75	1.16725	0.22311
dacC	EG10203	dacC	76.72	112.44	0.68512	-0.545572
dacD	EG11893	dacD	33.89	52.16	0.656321	-0.607528
dadA	EG11407	dadAX	45.67	20.83	2.13788	1.09618
dadX	EG11408	dadAX	61.55	107.36	0.577243	-0.792751
dam	EG10204	aroKB-damX-dam-rpe-gph-trpS	204.77	339.39	0.604512	-0.726156
dam	EG10204	dam-rpe-gph-trpS	204.77	339.39	0.604512	-0.726156
dam	EG10204	damX-dam-rpe-gph-trpS	204.77	339.39	0.604512	-0.726156
damX	EG11183	damX-dam-rpe-gph-trpS	40.98	42.04	0.975372	-0.035976
damX	EG11183	aroKB-damX-dam-rpe-gph-trpS	40.98	42.04	0.975372	-0.035976
dapA	EG10205	dapA-nlpB	30	23.08	1.28738	0.364433
dapB	EG10206	dapB	8.02	32.91	0.265998	-1.91051
dapD	EG10207	dapD	39.95	81.98	0.493492	-1.0189
dapD	EG10207	map-glnD-dapD	39.95	81.98	0.493492	-1.0189
dapE	EG10208	yffB-dapE-ypfN	35.06	59.96	0.591535	-0.757463
dapE	EG10208	dapE-ypfN	35.06	59.96	0.591535	-0.757463
dapF	EG10209	yifL-dapF-yigA-xerC-yigB	15.98	57.39	0.290803	-1.78188
dbpA	EG10210	dbpA-C0343	71.97	108.29	0.667673	-0.582786
dcd	EG11418	dcd	124.59	151.07	0.82587	-0.276014
dcd	EG11418	udk-dcd	124.59	151.07	0.82587	-0.276014
dcm	EG10211	dcm-vsr	32.52	38.13	0.856632	-0.223253
dcp	EG10212	dcp	141.77	92.56	1.52597	0.609729
dcrB	EG12218	dcrB	389.86	375.75	1.03745	0.0530444
dctA	EG20044	dctA	107.56	147.15	0.732771	-0.448566
dctR	EG11889	slp-dctR	1812.53	2216.28	0.817908	-0.28999
dcuA	EG11225	dcuA	35.44	57.14	0.626763	-0.674008
dcuA	EG11225	aspA-dcuA	35.44	57.14	0.626763	-0.674008
dcuB	EG10006	dcuB-fumB	29.49	50.44	0.592729	-0.754554
dcuC	EG13545	dcuC	33.29	58.56	0.575722	-0.796556
dcuD	EG12818	dcuD	168.66	168.1	1.00331	0.00476979
dcuR	EG12464	dcuSR	659.21	638.77	1.03195	0.0453717
dcuR	EG12464	dcuR	659.21	638.77	1.03195	0.0453717
dcuS	EG12465	dcuSR	60.59	99.46	0.61308	-0.705853
dcyD	EG14038	dcyD-yecSC	53.43	34.26	1.54368	0.62637
ddlA	EG10213	ddlA	2528.49	3391	0.745722	-0.42329
ddlB	EG10214	mraZW-ftsLI-murEF-mraY-murD-ftsW-murGC-ddlB-ftsQAZ-lpxC	7.16	29.37	0.268686	-1.89601
ddlB	EG10214	mraW-ftsLI-murEF-mraY-murD-ftsW-murGC-ddlB-ftsQAZ-lpxC	7.16	29.37	0.268686	-1.89601
ddlB	EG10214	ftsLI-murEF-mraY-murD-ftsW-murGC-ddlB-ftsQAZ-lpxC	7.16	29.37	0.268686	-1.89601
ddpA	EG13790	ddpXABCDF	59.5	82.85	0.721527	-0.470876
ddpB	EG13789	ddpXABCDF	19.33	33.06	0.596888	-0.744468
ddpC	EG13788	ddpXABCDF	88.19	98.02	0.900727	-0.150838
ddpD	EG13787	ddpXABCDF	46.75	34.26	1.35423	0.437468
ddpF	EG13786	ddpXABCDF	3185.84	2509.85	1.26923	0.343951
ddpX	EG13791	ddpXABCDF	0	34.86	0.0278862	-5.1643
deaD	EG10215	deaD	118.59	257.66	0.462344	-1.11296
deaD	EG10215	yrbN-deaD	118.59	257.66	0.462344	-1.11296
dedA	EG10216	dedA	69.92	81.98	0.854664	-0.226571
dedA	EG10216	usg-truA-dedA	69.92	81.98	0.854664	-0.226571
dedA	EG10216	pdxB-usg-truA-dedA	69.92	81.98	0.854664	-0.226571
dedD	EG10218	dedD	9.94	10.2	0.976786	-0.033886
dedD	EG10218	folC-dedD	9.94	10.2	0.976786	-0.033886
def	EG11440	def-fmt	25.85	26.52	0.975654	-0.0355584
degP	EG10463	degP	46.26	75.94	0.614245	-0.703114
degQ	EG12612	degQS	24.09	64.27	0.384403	-1.37931
degS	EG11652	degQS	154.31	227.98	0.678269	-0.560071
deoA	EG10219	deoCABD	89.69	97.13	0.924182	-0.113751
deoA	EG10219	deoA	89.69	97.13	0.924182	-0.113751
deoB	EG10220	deoCABD	59.24	44.21	1.33245	0.41408
deoB	EG10220	deoBD	59.24	44.21	1.33245	0.41408
deoB	EG10220	deoA	59.24	44.21	1.33245	0.41408
deoC	EG10221	deoCABD	8.45	52.03	0.178201	-2.48842
deoD	EG10222	deoBD	54.93	56.36	0.97507	-0.0364227
deoD	EG10222	deoA	54.93	56.36	0.97507	-0.0364227
deoD	EG10222	deoCABD	54.93	56.36	0.97507	-0.0364227
deoR	EG10223	deoR	851.16	793.08	1.07314	0.10184
der	EG14207	bamB-der	147.69	119.38	1.23517	0.304712
dfp	EG10004	dfp	32.39	22.16	1.44171	0.527781
dgkA	EG10224	dgkA	2661.86	3005.99	0.885557	-0.175343
dgoA	EG11716	dgoRKADT	0	10.94	0.0837521	-3.57773
dgoD	EG20050	dgoRKADT	17.21	41.2	0.431517	-1.21251
dgoR	EG11718	dgoRKADT	38.22	29.41	1.28971	0.367044
dgsA	EG13156	dgsA-ynfK	248.35	293.58	0.846459	-0.240487
dgsA	EG13156	dgsA	248.35	293.58	0.846459	-0.240487
dgt	EG10225	dgt	65.14	53.47	1.21425	0.280061
dhaK	EG13901	dhaKLM	6.16	44.21	0.158372	-2.65861
dhaL	EG13900	dhaKLM	0	10.68	0.0856164	-3.54597
dhaM	EG12399	dhaM	125.43	195.42	0.643672	-0.635603
dhaM	EG12399	dhaKLM	125.43	195.42	0.643672	-0.635603
dhaR	EG13902	dhaR	58.37	52.84	1.10271	0.141056
diaA	EG12780	diaA	167.31	91.55	1.81858	0.862816
dicA	EG10226	dicA	32.31	248.66	0.133421	-2.90594
dicB	EG10227	dicB-ydfDE-insD-intD	0	0	1	0
dicC	EG10228	dicC-ydfXW	0	29.28	0.0330251	-4.92029
dicF	EG31115	dicF	0	255.23	0.00390274	-8.0013
dinB	EG13141	dinB-yafNOP	31.21	25.62	1.20999	0.274998
dinD	EG11193	dinD	151.82	180.36	0.842633	-0.247023
dinF	EG11491	lexA-dinF	71.65	39.21	1.80676	0.853409
dinG	EG11357	dinG	27.58	40.88	0.682426	-0.551256
dinI	EG12670	dinI	26.8	54.99	0.496517	-1.01008
dinJ	EG13142	dinJ-yafQ	50.51	77.74	0.654178	-0.612244
dinQ	EG14431	dinQ	970.93	1939.91	0.50076	-0.997809
dipZ	EG12178	dipZ-yjdC	19.41	35.85	0.553867	-0.852388
djlA	EG11570	djlA	0	16.58	0.0568828	-4.13586
djlB	EG13649	ybeR-djlB	78.48	47.36	1.64351	0.716778
djlC	EG13652	ybeU-djlC	36.32	41.92	0.869525	-0.201701
dkgA	EG13015	dkgA	95.54	106.19	0.900644	-0.150972
dkgA	EG13015	yqhD-dkgA	95.54	106.19	0.900644	-0.150972
dkgB	EG11648	dkgB	352.56	496.32	0.710931	-0.492219
dksA	EG10230	sfsA-dksA	43.37	118.66	0.370801	-1.43128
dksA	EG10230	dksA-yadB	43.37	118.66	0.370801	-1.43128
dld	EG10231	dld	115.25	137.95	0.836632	-0.257335
dmlA	EG13507	dmlA	54.63	168.15	0.32888	-1.60437
dmlR	EG13506	dmlR	28.54	14.64	1.88875	0.917429
dmsA	EG10232	dmsABC	35.05	63.62	0.557877	-0.841981
dmsB	EG10233	dmsABC	10.67	32.83	0.34496	-1.5355
dmsC	EG10234	dmsABC	221.26	172.22	1.28311	0.359643
dmsD	EG13847	ynfEFGH-dmsD	32.16	43.99	0.737053	-0.44016
dnaA	EG10235	dnaAN-recF	28.17	96.35	0.29964	-1.7387
dnaB	EG10236	dnaB	125.7	262.71	0.480452	-1.05754
dnaC	EG10237	yjjB-dnaTC-yjjA	0	27.49	0.0351	-4.83238
dnaC	EG10237	yjjB-dnaTC	0	27.49	0.0351	-4.83238
dnaC	EG10237	dnaTC-yjjA	0	27.49	0.0351	-4.83238
dnaC	EG10237	dnaTC	0	27.49	0.0351	-4.83238
dnaE	EG10238	bamA-hlpA-lpxD-fabZ-lpxAB-rnhB-dnaE	49.21	56.31	0.876112	-0.190812
dnaG	EG10239	rpsU-dnaG-rpoD	45.31	65.85	0.692745	-0.529604
dnaJ	EG10240	dnaKJ	5.83	23.92	0.274077	-1.86735
dnaK	EG10241	dnaKJ	34.39	74.09	0.471301	-1.08528
dnaN	EG10242	dnaN-recF	239.5	319.44	0.750531	-0.414017
dnaN	EG10242	dnaAN-recF	239.5	319.44	0.750531	-0.414017
dnaQ	EG10243	dnaQ	27.02	120.12	0.231341	-2.11191
dnaT	EG10244	yjjB-dnaTC-yjjA	24.42	75.15	0.333815	-1.58288
dnaT	EG10244	yjjB-dnaTC	24.42	75.15	0.333815	-1.58288
dnaT	EG10244	dnaTC-yjjA	24.42	75.15	0.333815	-1.58288
dnaT	EG10244	dnaTC	24.42	75.15	0.333815	-1.58288
dnaX	EG10245	dnaX	30.71	28.01	1.09307	0.128388
dosC	EG13793	dosCP	14.3	9.78	1.4193	0.505175
dosP	EG13792	dosCP	41.2	39.45	1.04326	0.0611033
dosP	EG13792	dosP	41.2	39.45	1.04326	0.0611033
dpiA	EG13544	dpiBA	329.12	446.93	0.73699	-0.440283
dpiB	EG13646	dpiBA	3.97	32.61	0.147873	-2.75757
dppA	EG10248	dppABCDF	106.59	113.57	0.939077	-0.0906854
dppB	EG12625	dppABCDF	19.39	53.05	0.377243	-1.40643
dppC	EG12626	dppABCDF	29.2	14.98	1.88986	0.918281
dppD	EG12627	dppABCDF	13.4	20.62	0.66605	-0.586298
dppF	EG12628	dppABCDF	78.71	255.73	0.310482	-1.68742
dps	EG11415	dps	183.11	268.39	0.683433	-0.549128
dsbA	EG11297	dsbA	0	10.79	0.0848176	-3.55949
dsbA	EG11297	rdoA-dsbA	0	10.79	0.0848176	-3.55949
dsbB	EG11393	dsbB	571.07	968.03	0.590353	-0.76035
dsbC	EG11070	dsbC-recJ-prfB	27.81	38.05	0.737772	-0.438753
dsbC	EG11070	xerD-dsbC-recJ	27.81	38.05	0.737772	-0.438753
dsbC	EG11070	dsbC	27.81	38.05	0.737772	-0.438753
dsbG	EG13535	dsbG	255.92	217.3	1.17691	0.235007
dsdA	EG10249	dsdXA	69.44	66.16	1.04884	0.0687927
dsdA	EG10249	dsdA	69.44	66.16	1.04884	0.0687927
dsdC	EG13161	dsdC	42.26	50.58	0.838697	-0.253778
dsdX	EG10250	dsdXA	83.76	101.1	0.830167	-0.268527
dsrA	EG31118	dsrA	59101.9	36227.4	1.6314	0.706109
dsrB	EG12636	dsrB	34.88	35.79	0.975265	-0.0361338
dtd	EG11852	yihXY-dtd-yiiD	45.15	15.44	2.80718	1.48912
dtpB	EG12232	dtpB	62.78	78.22	0.8051	-0.312761
dtpD	EG13304	dtpD	88.96	114.09	0.781649	-0.355407
dusA	EG11932	dusA	13.28	6.81	1.82843	0.870602
dusB	EG11311	dusB-fis	75.07	112.02	0.673067	-0.571179
dusC	EG12022	dusC	0	28.54	0.0338524	-4.8846
dut	EG10251	dut-slmA	14.46	29.66	0.50424	-0.987817
dxr	EG12715	dxr	88.12	146.91	0.602529	-0.730898
dxs	EG13612	xseB-ispA-dxs-yajO	1234.92	1158.1	1.06628	0.0925804
eaeH	EG12161	eaeH-insE-1F-1-insEF-1	30.24	46.54	0.657131	-0.605747
eamA	EG11639	eamA	7.32	52.6	0.155224	-2.68758
eamB	EG12445	yfiK	269.07	609.63	0.442281	-1.17697
ebgA	EG10252	ebgAC	74.6	107.15	0.699029	-0.516576
ebgC	EG10253	ebgAC	0	30.06	0.0321958	-4.95699
ebgR	EG10254	ebgR	66.99	123.72	0.545141	-0.875298
ecnA	EG14372	ecnAB	627.82	1180.92	0.532033	-0.910413
ecnB	EG14345	ecnB	44.84	92.02	0.492797	-1.02093
ecnB	EG14345	ecnAB	44.84	92.02	0.492797	-1.02093
eco	EG10255	eco	53.92	55.32	0.975142	-0.0363157
ecpD	EG11973	ecpD-htrE	53.38	54.76	0.975251	-0.0361543
eda	EG10256	edd-eda	30.8	10.54	2.75563	1.46238
eda	EG10256	eda	30.8	10.54	2.75563	1.46238
edd	EG10257	edd-eda	10.91	18.66	0.605799	-0.72309
efeB	EG11735	efeOB	62.19	127.61	0.49133	-1.02523
efeO	EG13861	efeOB	29.22	83.94	0.355781	-1.49094
efeU_1	EG13860	efeU_1U_2	7.94	57.04	0.154032	-2.6987
efp	EG12099	efp	883.6	1085.5	0.814174	-0.296591
elaA	EG13184	elaA	14.27	43.92	0.339938	-1.55666
elaB	EG13185	elaB	21.54	0	22.54	4.49442
elaD	EG14261	elaD	407.93	61.38	6.55547	2.7127
elbB	EG11383	elbB-mtgA	30.24	82.73	0.373104	-1.42235
elfA	EG13709	elfA	2050.89	951.9	2.15331	1.10656
elfC	EG13711	elfDCG-ycbUVF	81.1	104.01	0.78183	-0.355073
elfD	EG13710	elfDCG-ycbUVF	112.69	154.15	0.732775	-0.448558
elfG	EG13712	elfDCG-ycbUVF	92.33	126.3	0.73315	-0.44782
emrA	EG11354	emrRAB	67.44	63.43	1.06224	0.0871072
emrB	EG11439	emrRAB	149.92	123.05	1.21661	0.282862
emrD	EG11693	emrD	38.94	51.37	0.76265	-0.390906
emrE	EG10629	renD-emrE	0	0	1	0
emrE	EG10629	emrE	0	0	1	0
emrK	EG13282	emrKY	5.66	34.86	0.185722	-2.42878
emrY	EG13283	emrY	21.42	17.58	1.20667	0.271036
emrY	EG13283	emrKY	21.42	17.58	1.20667	0.271036
emtA	EG13897	emtA	10.77	11.05	0.976764	-0.0339188
endA	EG11336	endA	65.18	66.87	0.975099	-0.0363788
eno	EG10258	pyrG-eno	60.9	72.89	0.837732	-0.25544
eno	EG10258	eno	60.9	72.89	0.837732	-0.25544
entA	EG10259	entCEBA-ybdB	423.59	380.28	1.11359	0.15522
entB	EG10260	entCEBA-ybdB	7.68	31.53	0.266831	-1.906
entC	EG10261	entCEBA-ybdB	11.21	17.25	0.669041	-0.579833
entD	EG10262	fepA-entD	106.15	54.46	1.93202	0.950112
entD	EG10262	entD	106.15	54.46	1.93202	0.950112
entE	EG10263	entCEBA-ybdB	102.3	71.37	1.42739	0.513377
entF	EG10264	fes-ybdZ-entF-fepE	42.45	55.75	0.765639	-0.385264
entH	EG11105	entH	0	98.02	0.010099	-6.62965
entH	EG11105	entCEBA-ybdB	0	98.02	0.010099	-6.62965
entS	EG11104	entS	5.27	16.22	0.364112	-1.45755
envC	EG12297	gpmM-envC-yibQ	26.16	16.1	1.5883	0.667487
envR	EG11741	envR	169.03	438.66	0.386731	-1.3706
envY	EG10268	envY-ompT	449.86	266.28	1.68685	0.754328
envZ	EG10269	ompR-envZ	194.89	289.93	0.673323	-0.570628
epd	EG10368	epd-pgk	187.42	311.65	0.602655	-0.730596
epd	EG10368	epd-pgk-fbaA	187.42	311.65	0.602655	-0.730596
eptA	EG11613	eptA	72.18	90.51	0.799694	-0.32248
eptB	EG12267	eptB	66.23	75.95	0.873684	-0.194816
era	EG10270	rnc-era	7.28	37.33	0.216019	-2.21077
era	EG10270	rnc-era-recO-pdxJ-acpS	7.28	37.33	0.216019	-2.21077
erfK	EG12682	erfK	98.92	289.97	0.343403	-1.54203
erpA	EG12332	erpA	38.22	352.88	0.110829	-3.1736
essD	EG13634	essD-ybcS-rzpD	152.6	281.81	0.543121	-0.880655
essQ	EG13831	essQ-ydfRQP	30.52	0	31.52	4.9782
etk	EG11826	gfcE-etp-etk	175.31	303.91	0.578236	-0.790269
etk	EG11826	etk	175.31	303.91	0.578236	-0.790269
etp	EG13727	gfcE-etp-etk	88.48	136.18	0.652282	-0.616433
eutA	EG14181	eutHA	18.78	33.72	0.5697	-0.811725
eutB	EG50006	eutBCLKR	3784.91	5581.6	0.678162	-0.560297
eutC	EG50007	eutBCLKR	14.85	53.32	0.291789	-1.777
eutD	EG14188	eutSPQTDM	19.45	46.55	0.430074	-1.21734
eutE	EG14185	eutNEJG	42.26	28.9	1.44682	0.532888
eutG	EG14183	eutNEJG	11.1	17.08	0.669248	-0.579388
eutH	EG14182	eutHA	5.37	49.61	0.125864	-2.99006
eutJ	EG14184	eutNEJG	7.88	16.16	0.517483	-0.950418
eutK	EG14170	eutBCLKR	39.47	121.5	0.330367	-1.59786
eutL	EG14171	eutBCLKR	29.96	112.72	0.272248	-1.87701
eutM	EG14187	eutSPQTDM	403.6	207.05	1.94472	0.959566
eutN	EG14186	eutNEJG	22.89	0	23.89	4.57833
eutP	EG14191	eutSPQTDM	96.14	14.09	6.43738	2.68647
eutQ	EG14190	eutSPQTDM	28.17	9.63	2.74412	1.45634
eutR	EG12190	eutBCLKR	281.72	314.73	0.895449	-0.159317
eutS	EG14192	eutSPQTDM	78.48	20.13	3.76148	1.9113
eutT	EG14189	eutSPQTDM	16.4	16.82	0.976431	-0.03441
evgA	EG11609	evgAS	21.44	76.98	0.287766	-1.79703
evgS	EG11610	evgAS	60.53	101.62	0.599591	-0.73795
exbB	EG10271	exbBD	44.84	73.62	0.614312	-0.702955
exbD	EG10272	exbBD	92.85	63.51	1.45481	0.540834
exbD	EG10272	exbD	92.85	63.51	1.45481	0.540834
exoX	EG14031	yobB-exoX	487.2	408.05	1.1935	0.255195
exuR	EG12739	exuR	144.23	304.66	0.475136	-1.07359
exuT	EG12738	exuT	171.89	247.85	0.694756	-0.525422
fabA	EG10273	fabA	1473.39	1941.73	0.758927	-0.397967
fabB	EG10274	fabB	86.38	83.09	1.03912	0.0553689
fabD	EG11317	plsX-fabHDG	0	21.82	0.0438212	-4.51223
fabD	EG11317	fabHDG	0	21.82	0.0438212	-4.51223
fabD	EG11317	rpmF-plsX-fabHDG	0	21.82	0.0438212	-4.51223
fabD	EG11317	fabDG-acpP	0	21.82	0.0438212	-4.51223
fabF	EG12606	acpP-fabF	79.62	87.13	0.914785	-0.128495
fabG	EG11318	fabG-acpP	44.84	36.81	1.21238	0.277839
fabG	EG11318	plsX-fabHDG	44.84	36.81	1.21238	0.277839
fabG	EG11318	fabHDG	44.84	36.81	1.21238	0.277839
fabG	EG11318	rpmF-plsX-fabHDG	44.84	36.81	1.21238	0.277839
fabG	EG11318	fabDG-acpP	44.84	36.81	1.21238	0.277839
fabH	EG10277	plsX-fabHDG	269.49	99.25	2.69815	1.43197
fabH	EG10277	fabHDG	269.49	99.25	2.69815	1.43197
fabH	EG10277	rpmF-plsX-fabHDG	269.49	99.25	2.69815	1.43197
fabI	EG11528	fabI	242.3	240.02	1.00946	0.0135834
fabR	EG11394	fabR-yijD	223.81	250.5	0.893877	-0.161852
fabZ	EG11284	fabZ	43.37	14.83	2.80291	1.48692
fabZ	EG11284	hlpA-lpxD-fabZ-lpxA	43.37	14.83	2.80291	1.48692
fabZ	EG11284	bamA-hlpA-lpxD-fabZ-lpxAB-rnhB-dnaE	43.37	14.83	2.80291	1.48692
fadA	EG10278	fadBA	118.93	139.45	0.853898	-0.227864
fadB	EG10279	fadBA	15.05	33.97	0.458965	-1.12354
fadD	EG11530	fadD-sroD	19.55	44.13	0.455351	-1.13495
fadE	EG13145	fadE	26.96	24.9	1.07954	0.110412
fadH	EG12723	fadH	32.65	77.05	0.431134	-1.21379
fadI	EG14128	fadIJ	35.2	30.95	1.13302	0.180174
fadJ	EG14127	fadIJ	21.51	44.14	0.498671	-1.00384
fadK	EG12357	ydiQRST-fadK	148.09	221.75	0.669315	-0.579242
fadL	EG10280	fadL	103.23	95.83	1.07642	0.106245
fadM	EG13251	fadM	462.61	661.09	0.700222	-0.514116
fadR	EG10281	fadR	695.84	338.17	2.05454	1.03882
fbaA	EG10282	epd-pgk-fbaA	103.77	118.99	0.873156	-0.195689
fbaA	EG10282	pgk-fbaA	103.77	118.99	0.873156	-0.195689
fbaB	EG14062	fbaB	68.86	134.88	0.51413	-0.959795
fbp	EG10283	fbp	844.64	555.16	1.5205	0.604544
fcl	EG11788	wcaCDEF-gmd-dcI-nudD-wcaI-cspBGJ-wzxC	40.94	49.01	0.838632	-0.25389
fdhD	EG11859	fdhD	0	16.22	0.058072	-4.10601
fdhE	EG10284	fdhE	283.53	239.99	1.18067	0.239607
fdhE	EG10284	fdoGHI-fdhE	283.53	239.99	1.18067	0.239607
fdhF	EG10285	fdhF	42.97	100.76	0.432095	-1.21058
fdnG	EG11227	fdnGHI	10.81	13.31	0.825297	-0.277015
fdnH	EG11228	fdnGHI	29.79	53.5	0.564954	-0.823794
fdnI	EG11229	fdnGHI	90.72	51.71	1.74009	0.79916
fdoG	EG11858	fdoGHI-fdhE	25.93	48.77	0.541089	-0.886062
fdoH	EG11857	fdoGHI-fdhE	102.2	134.82	0.759829	-0.396253
fdoI	EG11856	fdoGHI-fdhE	31.09	31.9	0.97538	-0.0359638
fdrA	EG13399	fdrA-ylbE_1E_2F-ybcF	19.76	20.27	0.976023	-0.0350136
fdx	EG11328	hscBA-fdx-iscX	78.48	281.81	0.281037	-1.83117
feaB	EG13179	feaB	4.39	18.04	0.283088	-1.82068
feaR	EG13422	feaR	36.38	52.26	0.70184	-0.510786
fecA	EG10286	fecABCDE	39.69	46.54	0.855911	-0.224468
fecB	EG10287	fecABCDE	189.81	194.74	0.974813	-0.0368019
fecC	EG10288	fecABCDE	13.2	54.16	0.257433	-1.95773
fecD	EG10289	fecABCDE	34.44	28.27	1.2108	0.275956
fecE	EG10290	fecE	283.26	167.33	1.68871	0.755919
fecE	EG10290	fecABCDE	283.26	167.33	1.68871	0.755919
fecI	EG10291	fecIR	63.14	77.74	0.81458	-0.295872
fecR	EG10292	fecIR	48.37	56.72	0.855336	-0.225437
feoA	EG12101	feoABC	86.74	88.99	0.974997	-0.03653
feoB	EG12102	feoABC	25.55	40.78	0.635472	-0.654101
feoC	EG12933	feoABC	111.26	28.54	3.80027	1.9261
feoC	EG12933	yhgG	111.26	28.54	3.80027	1.9261
fepA	EG10293	fepA-entD	50.01	57.34	0.874357	-0.193705
fepB	EG10294	fepB	13.78	42.4	0.340553	-1.55405
fepC	EG10295	fepDGC	0	8.29	0.107643	-3.21568
fepD	EG10296	fepDGC	0	67.3	0.0146413	-6.09381
fepE	EG10297	fes-ybdZ-entF-fepE	0	77.54	0.0127324	-6.29536
fepG	EG10298	fepDGC	59.75	115.79	0.520164	-0.94296
fes	EG10299	fes-ybdZ-entF-fepE	41.02	84.17	0.493366	-1.01927
ffh	EG10300	ffh	9.68	34.76	0.298658	-1.74343
ffs	EG30027	ffs	751.73	1542.55	0.487662	-1.03605
fhlA	EG10301	hypABCDE-fhlA	85.61	71.57	1.19347	0.25516
fhlA	EG10301	hypBCDE-fhlA	85.61	71.57	1.19347	0.25516
fhuA	EG10302	fhuACDB	161.57	229.07	0.706611	-0.501012
fhuB	EG10303	fhuACDB	73.14	126.2	0.582862	-0.778775
fhuC	EG10304	fhuACDB	8.26	25.43	0.350359	-1.51309
fhuD	EG10305	fhuACDB	14.8	15.18	0.976514	-0.0342871
fhuE	EG10306	fhuE	120.4	216.18	0.558983	-0.839123
fhuF	EG12595	fhuF	33.42	102.87	0.331376	-1.59346
fic	EG10307	fic	21.86	11.22	1.8707	0.903581
fic	EG10307	yhfG-fic-pabA	21.86	11.22	1.8707	0.903581
fieF	EG11873	fieF	7.3	37.45	0.215865	-2.2118
fimA	EG10308	fimAICDFGH	0	12.32	0.0750751	-3.73552
fimB	EG10309	fimB	21.86	11.22	1.8707	0.903581
fimC	EG10310	fimAICDFGH	18.16	0	19.16	4.26003
fimD	EG10311	fimAICDFGH	20	64.12	0.322482	-1.63271
fimE	EG10312	fimE	33.13	33.99	0.975422	-0.0359023
fimF	EG10313	fimAICDFGH	0	25.47	0.0377786	-4.72629
fimG	EG10314	fimAICDFGH	39.24	40.26	0.975279	-0.0361134
fimH	EG10315	fimAICDFGH	58.4	194.74	0.303464	-1.7204
fimI	EG11974	fimAICDFGH	12.21	100.2	0.130534	-2.93751
fimZ	EG11103	fimZ	10.41	21.37	0.510058	-0.971267
fis	EG10317	dusB-fis	0	45.55	0.0214823	-5.54071
fiu	EG13317	fiu	77.96	162.94	0.48164	-1.05397
fixA	EG11562	fixABCX	0	43.86	0.0222916	-5.48736
fixB	EG11563	fixABCX	14	28.72	0.504711	-0.986472
fixC	EG11564	fixABCX	15.37	36.79	0.433183	-1.20695
fixX	EG11565	fixABCX	0	23.48	0.0408497	-4.61353
fklB	EG12503	fklB	382.15	479.22	0.797863	-0.325786
fkpA	EG12900	fkpA	194.6	457.55	0.426562	-1.22917
fkpB	EG11080	ileS-lspA-fkpB-ispH	14.65	0	15.65	3.96809
fkpB	EG11080	ribF-ileS-lspA-fkpB-ispH	14.65	0	15.65	3.96809
fkpB	EG11080	lsp-fkpB-ispH	14.65	0	15.65	3.96809
fldA	EG10318	fldA-fur	12.41	76.42	0.173211	-2.5294
fldB	EG12697	fldB	1944.81	2578.41	0.754362	-0.40667
flgA	EG20263	flgAMN	9.99	51.24	0.210375	-2.24896
flgB	EG14266	flgBCDEFGHIJ	0	0	1	0
flgC	EG14267	flgBCDEFGHIJ	32.55	66.8	0.494838	-1.01497
flgD	EG14268	flgBCDEFGHIJ	28.41	77.74	0.373508	-1.42079
flgE	EG14269	flgBCDEFGHIJ	87.24	139.86	0.626438	-0.674757
flgF	EG14270	flgBCDEFGHIJ	61.04	53.68	1.1346	0.182185
flgG	EG14271	flgBCDEFGHIJ	8.42	34.55	0.264979	-1.91605
flgH	EG20264	flgBCDEFGHIJ	37.72	19.35	1.9027	0.92805
flgI	EG20265	flgBCDEFGHIJ	12.01	6.16	1.81704	0.86159
flgJ	EG14272	flgBCDEFGHIJ	34.99	50.26	0.702107	-0.510237
flgK	EG11967	flgK	28.07	53.48	0.53359	-0.906196
flgL	EG11545	flgK	103.65	255.23	0.408422	-1.29187
flgM	EG12664	flgMN	89.69	69.02	1.2952	0.373177
flgM	EG12664	flgAMN	89.69	69.02	1.2952	0.373177
flgN	EG12665	flgN	205.51	389.26	0.52916	-0.918224
flgN	EG12665	flgMN	205.51	389.26	0.52916	-0.918224
flgN	EG12665	flgAMN	205.51	389.26	0.52916	-0.918224
flhA	EG14273	flhBAE	9.51	13.01	0.750178	-0.414694
flhB	EG14035	flhBAE	17.21	41.2	0.431517	-1.21251
flhC	EG10319	flhC	273.25	525.66	0.520734	-0.94138
flhC	EG10319	flhDC	273.25	525.66	0.520734	-0.94138
flhD	EG10320	flhDC	75.12	192.69	0.392999	-1.3474
flhE	EG14013	flhBAE	117.42	68.84	1.69559	0.761787
fliA	EG11355	fliAZY	91.56	103.33	0.887185	-0.172693
fliC	EG10321	fliC	462.37	840.35	0.550746	-0.860541
fliD	EG10841	fliDST	32.8	43.26	0.763669	-0.38898
fliE	EG11346	fliE	83.71	21.47	3.76992	1.91453
fliF	EG11347	fliFGHIJK	23.84	40.77	0.594685	-0.749802
fliG	EG11654	fliFGHIJK	19.86	20.37	0.976135	-0.0348478
fliH	EG11656	fliFGHIJK	28.79	19.69	1.43983	0.525894
fliI	EG20266	fliFGHIJK	9.6	19.69	0.512325	-0.964869
fliJ	EG20267	fliFGHIJK	29.69	30.47	0.975215	-0.0362085
fliK	EG20268	fliFGHIJK	46.75	89.94	0.525071	-0.929414
fliL	EG10322	fliLMNOPQR	70.88	174.54	0.409479	-1.28814
fliM	EG10323	fliLMNOPQR	131.19	121.14	1.08228	0.114077
fliN	EG10324	fliLMNOPQR	47.77	0	48.77	5.60792
fliO	EG11224	fliLMNOPQR	0	92.4	0.0107066	-6.54535
fliP	EG11975	fliLMNOPQR	53.59	82.48	0.653929	-0.612794
fliQ	EG11976	fliLMNOPQR	73.25	225.45	0.327887	-1.60873
fliR	EG11977	fliLMNOPQR	117.42	172.1	0.684113	-0.547693
fliS	EG11388	fliDST	16.04	49.37	0.338297	-1.56364
fliT	EG11389	fliDST	18.01	55.44	0.336818	-1.56996
fliY	EG12680	fliAZY	24.69	59.11	0.427383	-1.2264
fliY	EG12680	fliY	24.69	59.11	0.427383	-1.2264
fliZ	EG11356	fliAZY	191.08	330.82	0.578868	-0.788694
flk	EG10229	flk	66.19	122.23	0.545241	-0.875035
flu	EG12686	flu	242.98	327.33	0.743094	-0.428384
flxA	EG13429	flxA	296.94	304.66	0.974743	-0.0369059
fmt	EG11268	def-fmt	62.58	135.55	0.465617	-1.10278
fnr	EG10325	fnr	148.83	161.68	0.921011	-0.11871
fnrS	EG31185	fnrS	108.07	388.07	0.280335	-1.83478
focA	EG11258	focA-pflB	84.51	70.95	1.18846	0.249099
focB	EG14220	hyfABCDEFGHIJR-focB	147.53	350.52	0.422536	-1.24285
folA	EG10326	folA	329.61	338.17	0.974762	-0.0368783
folB	EG11673	folB	17.86	18.33	0.975685	-0.0355119
folC	EG10327	folC-dedD	51.95	111.93	0.468875	-1.09273
folD	EG10328	folD-ybcJ	0	31.2	0.0310559	-5.00899
folE	EG11375	folE-yeiB	19.71	90.99	0.225133	-2.15115
folK	EG11374	pcnB-folk	41.2	28.18	1.4462	0.532263
folM	EG13189	ydgI-folM	382.95	888.7	0.43155	-1.2124
folP	EG50011	folP-glmM	69.88	63.73	1.09501	0.130944
folX	EG14263	folX-yfcH	454	894.34	0.508187	-0.976569
frc	EG14145	frc	21.08	43.25	0.498983	-1.00294
frdA	EG10330	frdABCD	32.8	14.96	2.11779	1.08256
frdB	EG10331	frdABCD	35.88	55.21	0.656111	-0.607988
frdC	EG10332	frdABCD	16.65	17.08	0.976217	-0.0347265
frdD	EG10333	frdABCD	36.62	37.57	0.975369	-0.0359793
frdD	EG10333	frdD	36.62	37.57	0.975369	-0.0359793
fre	EG10334	fre	9.39	9.63	0.977422	-0.0329459
frlA	EG12908	frlABCDR	54.2	70.77	0.769124	-0.378713
frlB	EG12909	frlABCDR	45.11	33.06	1.35379	0.437001
frlC	EG12910	frlABCDR	15.87	16.28	0.976273	-0.0346433
frlD	EG12912	frlABCDR	50.32	0	51.32	5.68145
frlR	EG12913	frlABCDR	45.03	83.16	0.546934	-0.87056
frmA	EG50010	frmRAB	47.51	79.21	0.604787	-0.7255
frmB	EG13295	frmRAB	411.02	640.66	0.642116	-0.639095
frmR	EG13296	frmRAB	23.88	24.51	0.975304	-0.0360765
frr	EG10335	frr	11.81	36.36	0.34288	-1.54422
frsA	EG11091	frsA	42.36	152.11	0.283195	-1.82013
fruA	EG10336	fruBKA	19.48	55.96	0.359551	-1.47573
fruB	EG10005	fruBKA	23.31	53.82	0.443451	-1.17315
fruK	EG10337	fruBKA	63.18	57.62	1.09485	0.130731
fruR	EG10338	fruR	26.24	13.46	1.88382	0.913659
frvA	EG11864	frvABXR	58.99	60.52	0.97513	-0.0363334
frvB	EG11863	frvABXR	18.16	27.95	0.661831	-0.595466
frvR	EG11861	frvR	11.31	38.67	0.31031	-1.68822
frvR	EG11861	frvABXR	11.31	38.67	0.31031	-1.68822
frvX	EG11862	frvABXR	6.16	25.26	0.272658	-1.87484
frwB	EG11909	frwCB	0	0	1	0
frwC	EG11908	frwCB	18.31	25.05	0.741267	-0.431935
frwD	EG11912	frwD	77.1	158.21	0.490547	-1.02754
fryA	EG14151	fryA	92.44	92.13	1.00333	0.00479438
fryA	EG14151	fryBC-ypdFE-fryA	92.44	92.13	1.00333	0.00479438
fryB	EG14155	fryBC-ypdFE-fryA	20.16	62.05	0.335607	-1.57516
fryC	EG14154	fryBC-ypdFE-fryA	5.28	21.68	0.276896	-1.85258
fsaA	EG13471	fsaA	198.86	183.62	1.08255	0.114431
fsaB	EG11905	ptsA-fsaB-gldA	39.77	40.81	0.975126	-0.0363401
fsr	EG13268	fsr	253.75	204.95	1.23695	0.306788
ftnA	EG10921	ftnA	3018.08	1765.57	1.70901	0.773158
ftnB	EG13175	ftnB	78.48	67.1	1.16711	0.222937
ftsA	EG10339	mraZW-ftsLI-murEF-mraY-murD-ftsW-murGC-ddlB-ftsQAZ-lpxC	5.22	26.78	0.223902	-2.15906
ftsA	EG10339	ftsQAZ	5.22	26.78	0.223902	-2.15906
ftsA	EG10339	ftsAZ	5.22	26.78	0.223902	-2.15906
ftsA	EG10339	mraW-ftsLI-murEF-mraY-murD-ftsW-murGC-ddlB-ftsQAZ-lpxC	5.22	26.78	0.223902	-2.15906
ftsA	EG10339	ftsLI-murEF-mraY-murD-ftsW-murGC-ddlB-ftsQAZ-lpxC	5.22	26.78	0.223902	-2.15906
ftsB	EG13111	ftsB	0	43.36	0.0225428	-5.47119
ftsE	EG10340	ftsYEX	19.71	90.99	0.225133	-2.15115
ftsH	EG11506	rlmE-ftsH	37.47	80.39	0.472663	-1.08112
ftsH	EG11506	ftsH	37.47	80.39	0.472663	-1.08112
ftsI	EG10341	mraZW-ftsLI-murEF-mraY-murD-ftsW-murGC-ddlB-ftsQAZ-lpxC	82.08	107.17	0.76805	-0.380727
ftsI	EG10341	mraW-ftsLI-murEF-mraY-murD-ftsW-murGC-ddlB-ftsQAZ-lpxC	82.08	107.17	0.76805	-0.380727
ftsI	EG10341	ftsLI-murEF-mraY-murD-ftsW-murGC-ddlB-ftsQAZ-lpxC	82.08	107.17	0.76805	-0.380727
ftsK	EG13226	ftsK	120.61	242.4	0.49963	-1.00107
ftsL	EG11086	ftsLI-murEF-mraY-murD-ftsW-murGC-ddlB-ftsQAZ-lpxC	36.02	110.88	0.33089	-1.59558
ftsL	EG11086	mraZW-ftsLI-murEF-mraY-murD-ftsW-murGC-ddlB-ftsQAZ-lpxC	36.02	110.88	0.33089	-1.59558
ftsL	EG11086	mraW-ftsLI-murEF-mraY-murD-ftsW-murGC-ddlB-ftsQAZ-lpxC	36.02	110.88	0.33089	-1.59558
ftsP	EG11376	ftsP	60.65	86.16	0.70732	-0.499565
ftsQ	EG10342	ftsQAZ	39.66	8.14	4.44858	2.15334
ftsQ	EG10342	ftsQ	39.66	8.14	4.44858	2.15334
ftsQ	EG10342	mraZW-ftsLI-murEF-mraY-murD-ftsW-murGC-ddlB-ftsQAZ-lpxC	39.66	8.14	4.44858	2.15334
ftsQ	EG10342	mraW-ftsLI-murEF-mraY-murD-ftsW-murGC-ddlB-ftsQAZ-lpxC	39.66	8.14	4.44858	2.15334
ftsQ	EG10342	ftsLI-murEF-mraY-murD-ftsW-murGC-ddlB-ftsQAZ-lpxC	39.66	8.14	4.44858	2.15334
ftsW	EG10344	mraZW-ftsLI-murEF-mraY-murD-ftsW-murGC-ddlB-ftsQAZ-lpxC	15.88	27.16	0.599432	-0.738332
ftsW	EG10344	mraW-ftsLI-murEF-mraY-murD-ftsW-murGC-ddlB-ftsQAZ-lpxC	15.88	27.16	0.599432	-0.738332
ftsW	EG10344	ftsLI-murEF-mraY-murD-ftsW-murGC-ddlB-ftsQAZ-lpxC	15.88	27.16	0.599432	-0.738332
ftsX	EG10345	ftsX	18.67	70.25	0.27607	-1.85689
ftsX	EG10345	ftsYEX	18.67	70.25	0.27607	-1.85689
ftsY	EG10346	ftsYEX	30.89	49.8	0.627756	-0.671724
ftsZ	EG10347	ftsAZ	0	35.23	0.0276014	-5.17911
ftsZ	EG10347	mraW-ftsLI-murEF-mraY-murD-ftsW-murGC-ddlB-ftsQAZ-lpxC	0	35.23	0.0276014	-5.17911
ftsZ	EG10347	ftsLI-murEF-mraY-murD-ftsW-murGC-ddlB-ftsQAZ-lpxC	0	35.23	0.0276014	-5.17911
ftsZ	EG10347	ftsZ	0	35.23	0.0276014	-5.17911
ftsZ	EG10347	ftsQAZ	0	35.23	0.0276014	-5.17911
ftsZ	EG10347	mraZW-ftsLI-murEF-mraY-murD-ftsW-murGC-ddlB-ftsQAZ-lpxC	0	35.23	0.0276014	-5.17911
fucA	EG10348	fucAO	40.69	73.06	0.562922	-0.828993
fucI	EG10349	fucPIKUR	66.81	57.12	1.16672	0.222463
fucK	EG10350	fucPIKUR	68.24	79.35	0.86173	-0.214692
fucO	EG10351	fucAO	160.64	164.82	0.974792	-0.0368338
fucP	EG10352	fucPIKUR	120.13	138.66	0.867321	-0.205363
fucR	EG10353	fucR	162.1	267.95	0.606432	-0.721581
fucR	EG10353	fucPIKUR	162.1	267.95	0.606432	-0.721581
fucU	EG10355	fucPIKUR	15.58	15.99	0.975868	-0.0352418
fumA	EG10356	fumA	16.01	53.39	0.312741	-1.67696
fumB	EG10357	fumB	132.08	147.84	0.894115	-0.161468
fumB	EG10357	dcuB-fumB	132.08	147.84	0.894115	-0.161468
fumC	EG10358	fumC	272.32	284.22	0.958278	-0.0614841
fur	EG10359	fldA-fur	58.99	15.13	3.71916	1.89498
fur	EG10359	fur	58.99	15.13	3.71916	1.89498
fusA	EG10360	rpsLG-fusA-tufA	93.51	60.76	1.53028	0.613794
fusA	EG10360	fusA-tufA	93.51	60.76	1.53028	0.613794
fxsA	EG12382	fxsA	138.2	170.15	0.813322	-0.298102
gabD	EG11329	gabDTP	45.49	51.34	0.888231	-0.170993
gabD	EG11329	csiD-ygaF-gabDTP	45.49	51.34	0.888231	-0.170993
gabP	EG11330	gabDTP	32.94	86.9	0.386121	-1.37288
gabP	EG11330	csiD-ygaF-gabDTP	32.94	86.9	0.386121	-1.37288
gabT	EG10361	gabDTP	56.61	63.36	0.895121	-0.159845
gabT	EG10361	csiD-ygaF-gabDTP	56.61	63.36	0.895121	-0.159845
gadA	EG50009	gadAX	79.99	91.72	0.87349	-0.195137
gadB	EG11490	gadBC	75.28	111.03	0.680889	-0.554508
gadC	EG12456	gadBC	51.5	52.84	0.975111	-0.036361
gadC	EG12456	gadC	51.5	52.84	0.975111	-0.036361
gadE	EG11544	gadE-mdtEF	87.4	25.62	3.32081	1.73154
gadE	EG11544	gadE	87.4	25.62	3.32081	1.73154
gadW	EG12242	gadXW	126.6	352.55	0.360911	-1.47029
gadW	EG12242	gadW	126.6	352.55	0.360911	-1.47029
gadX	EG12243	gadXW	15.98	65.59	0.254993	-1.97147
gadX	EG12243	gadX	15.98	65.59	0.254993	-1.97147
gadX	EG12243	gadAX	15.98	65.59	0.254993	-1.97147
galE	EG10362	galETKM	38.89	46.55	0.838906	-0.253418
galF	EG13578	galF	44.24	121.05	0.370668	-1.4318
galK	EG10363	galETKM	120.48	188.36	0.641529	-0.640413
galM	EG11698	galETKM	107.65	136.44	0.790527	-0.339114
galM	EG11698	galM	107.65	136.44	0.790527	-0.339114
galP	EG12148	galP	14.18	38.79	0.381503	-1.39023
galR	EG10364	galR	134.14	72.09	1.84895	0.886709
galS	EG10365	galS	56.99	71.47	0.800193	-0.32158
galT	EG10366	galETKM	151.11	142.12	1.06281	0.0878898
galU	EG11319	galU	65.27	96.73	0.678093	-0.560446
gapA	EG10367	gapA-yeaD	26.47	47.53	0.566042	-0.82102
gapA	EG10367	gapA	26.47	47.53	0.566042	-0.82102
gapC_1	EG12103	gapC_1C_2	4478.17	3655.38	1.22503	0.292815
gapC_2	EG12103	gapC_1C_2	4478.17	3655.38	1.22503	0.292815
garD	EG12522	garD	20.97	51.63	0.417443	-1.26035
garK	EG11175	garPLRK-rnpB	28.76	11.8	2.325	1.21723
garL	EG10016	garPLRK-rnpB	94.05	35.09	2.63369	1.39709
garP	EG12760	garPLRK-rnpB	9.88	15.2	0.671605	-0.574315
garR	EG11176	garPLRK-rnpB	22.35	61.14	0.375764	-1.4121
gatA	EG12414	gatYZABCD	43.66	89.58	0.493045	-1.02021
gatA	EG12414	gatZABCD	43.66	89.58	0.493045	-1.02021
gatB	EG12415	gatYZABCD	231.3	1851.06	0.125428	-2.99507
gatB	EG12415	gatZABCD	231.3	1851.06	0.125428	-2.99507
gatC	EG12416	gatYZABCD	14.58	79.81	0.192798	-2.37484
gatC	EG12416	gatZABCD	14.58	79.81	0.192798	-2.37484
gatD	EG12417	gatYZABCD	31.66	84.46	0.382167	-1.38772
gatD	EG12417	gatZABCD	31.66	84.46	0.382167	-1.38772
gatR_1	EG12162	gatR_1	41.63	56.96	0.735507	-0.443188
gatR_2	EG12162	gatR_2	41.63	56.96	0.735507	-0.443188
gatY	EG12419	gatYZABCD	53.97	205.67	0.26598	-1.91061
gatZ	EG12418	gatZABCD	120.05	278.46	0.433157	-1.20704
gatZ	EG12418	gatYZABCD	120.05	278.46	0.433157	-1.20704
gcd	EG10369	gcd	38.6	45.26	0.856031	-0.224265
gcl	EG11583	gcl-hyi-glxR-ybbVW-allB-ybbY-glxK	25.9	15.18	1.66255	0.733395
gcp	EG11171	gcp	0	26.68	0.0361272	-4.79077
gcp	EG11171	ygjD	0	26.68	0.0361272	-4.79077
gcvA	EG11795	gcvA	35.9	125.25	0.292277	-1.77459
gcvB	EG31129	gcvB	16992.3	6106.83	2.78222	1.47624
gcvH	EG10371	gcvTHP	33.81	52.03	0.656421	-0.607307
gcvP	EG11810	gcvP	20.64	18.83	1.09128	0.126016
gcvP	EG11810	gcvTHP	20.64	18.83	1.09128	0.126016
gcvR	EG11149	gcvR	115.05	129.84	0.886961	-0.173057
gcvT	EG11442	gcvTHP	66.22	74.12	0.894835	-0.160307
gdhA	EG10372	gdhA	49.05	55.36	0.888041	-0.171302
gfcA	EG13732	gfcA	236.97	530.47	0.447758	-1.15921
gfcB	EG13731	gfcBCD	40.88	31.46	1.2902	0.367599
gfcC	EG13730	gfcBCD	26.47	18.11	1.43747	0.523529
gfcD	EG13729	gfcD	119.46	170.94	0.700593	-0.513351
gfcD	EG13729	gfcBCD	119.46	170.94	0.700593	-0.513351
gfcE	EG13728	gfcE-etp-etk	80.96	88.99	0.910768	-0.134845
ggt	EG10374	ggt	370.64	58.21	6.27664	2.64999
ghrA	EG13869	ghrA	161.47	216.09	0.748399	-0.41812
ghrB	EG12272	ghrB	209.6	242.79	0.863858	-0.211133
glcA	EG12995	glcBA	39.17	28.13	1.37899	0.463613
glcA	EG12995	glcA	39.17	28.13	1.37899	0.463613
glcA	EG12995	glcDEFGBA	39.17	28.13	1.37899	0.463613
glcB	EG20080	glcBA	42.49	49.82	0.855765	-0.224713
glcB	EG20080	glcDEFGBA	42.49	49.82	0.855765	-0.224713
glcC	EG12998	glcC	86.17	114.93	0.751919	-0.41135
glcD	EG12997	glcDEFGBA	8.79	27.05	0.34902	-1.51862
glcE	EG12996	glcDEFGBA	0	38.54	0.0252908	-5.30524
glcF	EG13291	glcDEFGBA	43.09	127.09	0.344211	-1.53863
glcG	EG12952	glcDEFGBA	16.28	33.4	0.502326	-0.993305
gldA	EG11904	gldA	11.94	55.14	0.230495	-2.11719
gldA	EG11904	ptsA-fsaB-gldA	11.94	55.14	0.230495	-2.11719
glf	EG11981	glf-rfc	17.91	36.76	0.500795	-0.997709
glgA	EG10377	glgBXCAP	18.39	51.88	0.366679	-1.44741
glgA	EG10377	glgAP	18.39	51.88	0.366679	-1.44741
glgA	EG10377	glgXCAP	18.39	51.88	0.366679	-1.44741
glgA	EG10377	glgCAP	18.39	51.88	0.366679	-1.44741
glgB	EG10378	glgBXCAP	30.14	30.93	0.975258	-0.0361437
glgC	EG10379	glgCAP	25.43	41.75	0.618246	-0.693748
glgC	EG10379	glgXCAP	25.43	41.75	0.618246	-0.693748
glgC	EG10379	glgBXCAP	25.43	41.75	0.618246	-0.693748
glgP	EG10380	glgBXCAP	75.4	132.62	0.571771	-0.806491
glgP	EG10380	glgAP	75.4	132.62	0.571771	-0.806491
glgP	EG10380	glgXCAP	75.4	132.62	0.571771	-0.806491
glgP	EG10380	glgP	75.4	132.62	0.571771	-0.806491
glgP	EG10380	glgCAP	75.4	132.62	0.571771	-0.806491
glgS	EG11381	glgS	754.32	1648.81	0.457822	-1.12714
glgX	EG10381	glgXCAP	63.45	78.8	0.807644	-0.308208
glgX	EG10381	glgBXCAP	63.45	78.8	0.807644	-0.308208
glk	EG12957	glk	116.01	140.03	0.829682	-0.26937
glmM	EG11553	folP-glmM	34.49	55.6	0.627032	-0.673389
glmS	EG10382	glmUS	111.67	99.79	1.11787	0.160751
glmS	EG10382	glmS	111.67	99.79	1.11787	0.160751
glmU	EG11198	glmUS	38.47	54.27	0.714131	-0.48574
glmY	EG31155	glmY	35.83	0	36.83	5.20281
glmZ	EG31165	glmZ	38.33	157.29	0.248468	-2.00887
glnA	EG10383	glnA	70.13	158.29	0.446544	-1.16313
glnA	EG10383	glnALG	70.13	158.29	0.446544	-1.16313
glnB	EG10384	glnB	369.47	259.37	1.42286	0.508794
glnB	EG10384	glrR-glnB	369.47	259.37	1.42286	0.508794
glnD	EG11411	glnD	118.38	129.04	0.918025	-0.123394
glnD	EG11411	map-glnD-dapD	118.38	129.04	0.918025	-0.123394
glnE	EG11602	ygiF-glnE	4.64	19.05	0.281297	-1.82984
glnE	EG11602	glnE	4.64	19.05	0.281297	-1.82984
glnG	EG10385	glnALG	14.03	33.58	0.434644	-1.20209
glnG	EG10385	glnLG	14.03	33.58	0.434644	-1.20209
glnH	EG10386	glnHPQ	105.9	36.22	2.87211	1.52211
glnK	EG12191	glnK-amtB	0	0	1	0
glnL	EG10387	glnALG	75.34	103.06	0.733615	-0.446905
glnL	EG10387	glnLG	75.34	103.06	0.733615	-0.446905
glnP	EG10388	glnHPQ	79.9	61.49	1.29461	0.372514
glnQ	EG10389	glnQ	36.47	93.55	0.396298	-1.33534
glnQ	EG10389	glnHPQ	36.47	93.55	0.396298	-1.33534
glnS	EG10390	glnS	35.63	109.68	0.330954	-1.5953
glnU	EG30028	metT-leuW-glnUW-metU-glnVX	5625.29	3246.47	1.73251	0.792868
glnV	EG30029	glnW-metU-glnVX	175.79	180.36	0.974801	-0.0368197
glnV	EG30029	metT-leuW-glnUW-metU-glnVX	175.79	180.36	0.974801	-0.0368197
glnW	EG30030	metT-leuW-glnUW-metU-glnVX	7558.98	6583.12	1.14821	0.199392
glnW	EG30030	glnW-metU-glnVX	7558.98	6583.12	1.14821	0.199392
glnX	EG30031	glnW-metU-glnVX	439.48	270.54	1.62216	0.697912
glnX	EG30031	metT-leuW-glnUW-metU-glnVX	439.48	270.54	1.62216	0.697912
gloA	EG13421	gloA	16.16	16.58	0.976109	-0.0348855
gloB	EG13330	gloB	287.75	357.86	0.804631	-0.3136
glpA	EG10391	glpABC	16.19	45.67	0.368331	-1.44093
glpB	EG10392	glpABC	10.46	21.47	0.510013	-0.971393
glpC	EG10393	glpABC	105.16	119.26	0.882754	-0.179917
glpD	EG10394	glpD	74.41	71.86	1.035	0.0496289
glpE	EG10395	glpEGR	20.16	82.73	0.252717	-1.98441
glpF	EG10396	glpFKX	225.97	247.83	0.912149	-0.132659
glpG	EG10397	glpGR	7.93	24.42	0.351298	-1.50923
glpG	EG10397	glpEGR	7.93	24.42	0.351298	-1.50923
glpK	EG10398	glpFKX	332.01	493.03	0.674068	-0.569033
glpQ	EG10399	glpTQ	281.56	370.52	0.760551	-0.394883
glpR	EG10400	glpEGR	26.06	62.38	0.426949	-1.22787
glpR	EG10400	glpR	26.06	62.38	0.426949	-1.22787
glpR	EG10400	glpGR	26.06	62.38	0.426949	-1.22787
glpT	EG10401	glpTQ	19.4	19.91	0.97561	-0.0356239
glpX	EG11517	glpFKX	6.52	20.07	0.356906	-1.48639
glpX	EG11517	glpX	6.52	20.07	0.356906	-1.48639
glrR	EG11285	yfhA	34.57	50.66	0.68854	-0.538387
glrR	EG11285	glrR-glnB	34.57	50.66	0.68854	-0.538387
gltA	EG10402	gltA	92.41	94.82	0.974849	-0.0367497
gltB	EG10403	gltBDF	31.03	66.71	0.473047	-1.07995
gltD	EG10404	gltBDF	37.16	66.73	0.563414	-0.827734
gltF	EG11514	gltBDF	43.09	35.36	1.2126	0.278099
gltI	EG12700	gltIJKL-sroC	137.79	126.49	1.08863	0.122519
gltJ	EG12661	gltIJKL-sroC	71.17	73.02	0.975007	-0.0365159
gltK	EG12662	gltIJKL-sroC	29.3	30.06	0.975531	-0.03574
gltL	EG12663	gltIJKL-sroC	9.08	46.58	0.211854	-2.23886
gltP	EG10405	gltP	15.05	25.74	0.600224	-0.736426
gltS	EG10406	gltS	27.33	16.82	1.58979	0.668833
gltT	EG30032	rrsB-gltT-rrlB-rrfB	86.74	266.98	0.327412	-1.61082
gltU	EG30033	rrsC-gltU-rrlC-rrfC	173.48	266.98	0.651093	-0.619064
gltV	EG30034	rrsE-gltV-rrlE-rrfE	86.74	88.99	0.974997	-0.03653
gltW	EG30035	rrsG-gltW-rrlG-rrfG	173.48	355.97	0.488781	-1.03274
gltX	EG10407	gltX	107.08	277.03	0.388735	-1.36314
glvC	EG11710	glvCBG-ysdC	53	100.39	0.532597	-0.908884
glvG	EG11708	glvCBG-ysdC	412.51	91.29	4.48055	2.16368
glxK	EG13621	ybbY-glxK	5.75	11.8	0.527344	-0.923184
glxK	EG13621	glxK	5.75	11.8	0.527344	-0.923184
glxK	EG13621	gcl-hyi-glxR-ybbVW-allB-ybbY-glxK	5.75	11.8	0.527344	-0.923184
glxR	EG13265	gcl-hyi-glxR-ybbVW-allB-ybbY-glxK	104.99	15.39	6.46675	2.69304
glyA	EG10408	glyA	141.94	215.74	0.6595	-0.600556
glyQ	EG10409	glyQS	14.46	14.83	0.976627	-0.0341209
glyS	EG10410	glyQS	9.55	19.6	0.512136	-0.965401
glyS	EG10410	glyS	9.55	19.6	0.512136	-0.965401
glyT	EG30036	thrU-tyrU-glyT-thrT-tufB	175.79	0	176.79	7.46589
glyU	EG30037	glyU	0	0	1	0
glyV	EG30038	glyVXY	0	0	1	0
glyW	EG30039	glyW-cysT-leuZ	0	0	1	0
glyX	EG30040	glyVXY	0	177.99	0.0055869	-7.48374
glyY	EG30041	glyVXY	0	0	1	0
gmd	EG11787	wcaCDEF-gmd-dcI-nudD-wcaI-cspBGJ-wzxC	47	72.34	0.654486	-0.611566
gmhB	EG11736	gmhB	755.35	998.08	0.757046	-0.401546
gmk	EG10965	gmk	327.49	270.97	1.20782	0.272402
gmm	EG11789	wcaCDEF-gmd-dcI-nudD-wcaI-cspBGJ-wzxC	41.2	56.36	0.735704	-0.442802
gmr	EG13415	gmr	175.92	217.96	0.808001	-0.30757
gnd	EG10411	gnd	28.11	48.07	0.593234	-0.753326
gnsA	EG13233	ymcE-gnsA	0	0	1	0
gnsB	EG13837	gnsB	37.89	38.87	0.97542	-0.0359044
gntK	EG12629	gntKU	37.46	76.86	0.493964	-1.01752
gntK	EG12629	gntRKU	37.46	76.86	0.493964	-1.01752
gntP	EG12563	gntP	98.1	156	0.63121	-0.663808
gntR	EG12630	gntRKU	19.86	40.74	0.49976	-1.00069
gntR	EG12630	gntR	19.86	40.74	0.49976	-1.00069
gntT	EG12380	gntT	260.28	215.69	1.20578	0.269964
gntU	EG12631	gntU	122.9	151.31	0.813473	-0.297834
gntU	EG12631	gntKU	122.9	151.31	0.813473	-0.297834
gntU	EG12631	gntRKU	122.9	151.31	0.813473	-0.297834
gntX	EG12934	gntXY	67.46	88.99	0.760751	-0.394503
gor	EG10412	gor	43.85	69.98	0.631868	-0.662305
gph	EG11871	damX-dam-rpe-gph-trpS	8.69	17.82	0.514878	-0.957698
gph	EG11871	rpe-gph-trpS	8.69	17.82	0.514878	-0.957698
gph	EG11871	dam-rpe-gph-trpS	8.69	17.82	0.514878	-0.957698
gph	EG11871	aroKB-damX-dam-rpe-gph-trpS	8.69	17.82	0.514878	-0.957698
gpmA	EG11699	gpmA	35.02	71.86	0.494373	-1.01633
gpmM	EG12296	gpmM-envC-yibQ	29.87	39.4	0.764109	-0.38815
gpp	EG10413	gpp	128.74	132.08	0.974902	-0.0366704
gpsA	EG20091	gpsA	32.31	39.79	0.816622	-0.29226
gpsA	EG20091	secB-gpsA	32.31	39.79	0.816622	-0.29226
gpt	EG10414	gpt	0	0	1	0
greA	EG10415	greA	96.74	70.9	1.35939	0.442957
greB	EG11578	greB	179.66	283.58	0.63483	-0.655557
groL	EG10599	groSL	40.03	90.34	0.449201	-1.15457
groL	EG10599	groL	40.03	90.34	0.449201	-1.15457
groS	EG10600	groSL	201.8	69.02	2.89632	1.53422
grpE	EG10416	grpE	88.78	148.02	0.602469	-0.73104
grxA	EG10417	grxA	102.2	52.43	1.9315	0.949721
grxB	EG12688	grxB	152.6	250.5	0.610736	-0.71138
grxC	EG12294	grxC	549.34	832.01	0.660664	-0.598011
grxD	EG12181	grxD	94.71	252.66	0.377316	-1.40615
gshA	EG10418	gshA	67.74	186.79	0.366047	-1.4499
gshB	EG10419	rsmE-gshB	131.7	135.13	0.974803	-0.0368168
gsiA	EG13472	iaaA-gsiABCD	21.13	50.58	0.429042	-1.22081
gsiB	EG13473	iaaA-gsiABCD	197.04	202.16	0.974798	-0.0368246
gsiC	EG13474	iaaA-gsiABCD	50.1	58.75	0.85523	-0.225615
gsiD	EG13475	iaaA-gsiABCD	14.46	29.66	0.50424	-0.987817
gsk	EG11102	gsk	1571	699.67	2.24357	1.16579
gspA	EG12888	gspAB	8.97	18.4	0.513918	-0.960391
gspB	EG11263	gspAB	31.39	48.31	0.656865	-0.606332
gspC	EG12889	gspCDEFGHIJKLMO	80.79	99.46	0.814155	-0.296625
gspD	EG12890	gspCDEFGHIJKLMO	97.89	110.82	0.884368	-0.177282
gspE	EG12891	gspCDEFGHIJKLMO	71.17	136.91	0.523312	-0.934256
gspF	EG12885	gspCDEFGHIJKLMO	253.33	361.62	0.701368	-0.511757
gspG	EG12886	gspCDEFGHIJKLMO	45.15	77.21	0.590078	-0.761022
gspH	EG12887	gspCDEFGHIJKLMO	12.93	66.31	0.206953	-2.27263
gspI	EG12892	gspCDEFGHIJKLMO	52.32	89.46	0.589432	-0.762603
gspJ	EG12893	gspCDEFGHIJKLMO	145.74	322.07	0.454205	-1.13858
gspK	EG12894	gspCDEFGHIJKLMO	408.66	460.52	0.887632	-0.171966
gspL	EG12895	gspCDEFGHIJKLMO	345.46	441.6	0.782784	-0.353315
gspM	EG12173	gspCDEFGHIJKLMO	256.84	204.95	1.25195	0.324182
gspO	EG11359	gspCDEFGHIJKLMO	10675.8	5167.37	2.06579	1.04669
gss	EG12882	gss	113.41	101.82	1.11272	0.154092
gst	EG12613	gst	54.39	44.64	1.21363	0.279327
gstB	EG13481	gstB	609.8	625.65	0.974707	-0.0369599
guaA	EG10420	guaBA	37.6	30	1.24516	0.316333
guaB	EG10421	guaBA	89.87	87.6	1.02562	0.0364974
guaC	EG10422	guaC	119.97	129.57	0.926476	-0.110174
guaD	EG13066	xanQ-guaD-ygfQ	109.87	169.09	0.651831	-0.617429
gudD	EG13167	gudD	9.83	70.61	0.151236	-2.72513
gudD	EG13167	gudPXD	9.83	70.61	0.151236	-2.72513
gudP	EG13169	gudPXD	29.23	29.99	0.975476	-0.0358218
gudX	EG13168	gudPXD	39.33	55.48	0.714058	-0.485887
gutM	EG10972	srlAEBD-gutM-srlR-gutQ	109.87	300.6	0.367606	-1.44377
gutQ	EG10973	srlAEBD-gutM-srlR-gutQ	177.43	196.04	0.905552	-0.14313
gyrA	EG10423	gyrA	65.22	87.5	0.748249	-0.41841
gyrB	EG10424	gyrB	30.03	44.81	0.677363	-0.561999
hcaB	EG13459	hcaEFCBD	0	24.96	0.0385208	-4.69822
hcaC	EG13458	hcaEFCBD	0	42.14	0.0231803	-5.43095
hcaD	EG13460	hcaEFCBD	87.68	163.04	0.5406	-0.887367
hcaE	EG13456	hcaEFCBD	29.04	4.97	5.03183	2.33108
hcaF	EG13457	hcaEFCBD	76.21	78.19	0.974997	-0.0365306
hcaR	EG13455	hcaR	125.78	83.5	1.50036	0.585304
hcaT	EG13454	hcaT	1567.08	2242.63	0.698903	-0.516836
hchA	EG11755	hchA	123.8	142.89	0.867329	-0.205348
hcp	EG13692	hcp-hcr	19.94	32.73	0.620812	-0.687771
hcr	EG13691	hcr	13.61	55.84	0.257037	-1.95995
hcr	EG13691	hcp-hcr	13.61	55.84	0.257037	-1.95995
hda	EG14201	hda	103.3	173.42	0.597982	-0.741826
hdeA	EG11398	hdeAB-yhiD	79.18	385.9	0.207237	-2.27065
hdeB	EG11399	hdeAB-yhiD	221.75	310.25	0.715663	-0.482648
hdeD	EG11495	hdeD	23.01	141.64	0.168326	-2.57067
hdfR	EG11449	hdfR	125.56	152.98	0.821925	-0.282921
hdhA	EG10425	hdhA	51.5	105.68	0.492126	-1.0229
helD	EG10426	helD	554.96	503.56	1.10187	0.139955
hemA	EG10427	hemA-prfA-prmC	15.73	80.71	0.204748	-2.28808
hemA	EG10427	hemA	15.73	80.71	0.204748	-2.28808
hemB	EG10428	hemB	33.81	62.43	0.548794	-0.865663
hemC	EG10429	hemCDXY	48.99	78.98	0.625031	-0.678
hemD	EG10430	hemCDXY	62.27	82.15	0.760914	-0.394195
hemE	EG11543	nudC-hemE-nfi	30.95	63.51	0.495272	-1.01371
hemF	EG12189	hemF	271.01	247.99	1.09245	0.127572
hemF	EG12189	amiA-hemF	271.01	247.99	1.09245	0.127572
hemG	EG11485	pepQ-yigZ-trkH-hemG	217.32	222.97	0.974773	-0.0368612
hemH	EG10431	hemH	102.68	168.56	0.611465	-0.709658
hemL	EG10432	hemL	46.31	26.4	1.72664	0.787969
hemN	EG11836	hemN	139.14	383.95	0.364047	-1.4578
hemX	EG10433	hemCDXY	44.62	91.55	0.492923	-1.02057
hemY	EG10434	hemCDXY	60.58	113.01	0.540128	-0.888627
hepA	EG11083	hepA-rluA	43.09	90.74	0.480597	-1.0571
hepA	EG11083	hepA	43.09	90.74	0.480597	-1.0571
hflC	EG10435	yjeFE-amiB-mutL-miaA-hfq-hflXKC	13.12	148.06	0.094727	-3.40008
hflC	EG10435	hfq-hflXKC	13.12	148.06	0.094727	-3.40008
hflC	EG10435	mutL-miaA-hfq-hflXKC	13.12	148.06	0.094727	-3.40008
hflC	EG10435	yjeE-amiB-mutL-miaA-hfq-hflXKC	13.12	148.06	0.094727	-3.40008
hflC	EG10435	miaA-hfq-hflXKC	13.12	148.06	0.094727	-3.40008
hflD	EG11345	hflD-purB	10.27	73.75	0.150769	-2.72959
hflK	EG10436	yjeFE-amiB-mutL-miaA-hfq-hflXKC	10.46	48.31	0.232407	-2.10527
hflK	EG10436	hfq-hflXKC	10.46	48.31	0.232407	-2.10527
hflK	EG10436	mutL-miaA-hfq-hflXKC	10.46	48.31	0.232407	-2.10527
hflK	EG10436	yjeE-amiB-mutL-miaA-hfq-hflXKC	10.46	48.31	0.232407	-2.10527
hflK	EG10436	miaA-hfq-hflXKC	10.46	48.31	0.232407	-2.10527
hflX	EG10437	hfq-hflXKC	15.44	15.84	0.976247	-0.0346819
hflX	EG10437	mutL-miaA-hfq-hflXKC	15.44	15.84	0.976247	-0.0346819
hflX	EG10437	yjeE-amiB-mutL-miaA-hfq-hflXKC	15.44	15.84	0.976247	-0.0346819
hflX	EG10437	yjeFE-amiB-mutL-miaA-hfq-hflXKC	15.44	15.84	0.976247	-0.0346819
hflX	EG10437	miaA-hfq-hflXKC	15.44	15.84	0.976247	-0.0346819
hfq	EG10438	yjeE-amiB-mutL-miaA-hfq-hflXKC	0	21.89	0.0436872	-4.51665
hfq	EG10438	yjeFE-amiB-mutL-miaA-hfq-hflXKC	0	21.89	0.0436872	-4.51665
hfq	EG10438	miaA-hfq-hflXKC	0	21.89	0.0436872	-4.51665
hfq	EG10438	hfq-hflXKC	0	21.89	0.0436872	-4.51665
hfq	EG10438	mutL-miaA-hfq-hflXKC	0	21.89	0.0436872	-4.51665
hha	EG10439	hha	90.3	61.77	1.45452	0.54054
hha	EG10439	tomB-hha	90.3	61.77	1.45452	0.54054
hicA	EG14421	hicAB	111.73	76.42	1.45608	0.542093
hicB	EG13760	hicAB	158.08	178.41	0.886684	-0.173508
higA	EG12724	higA	2402.89	681.21	3.52368	1.81708
higA	EG12724	higBA	2402.89	681.21	3.52368	1.81708
higB	EG12725	higBA	62.78	107.36	0.588594	-0.764656
hinT	EG12172	hinT-ycfL-lpoB-thiK-nagZ-ycfP	0	56.36	0.0174338	-5.84197
hipA	EG10443	hipBA	0	25.56	0.0376506	-4.73118
hipB	EG10442	hipBA	123.45	126.66	0.974855	-0.0367404
hisA	EG10444	hisLGDCBHAFI	0	0	1	0
hisA	EG10444	hisBHAFI	0	0	1	0
hisB	EG10445	hisBHAFI	24.69	31.66	0.786589	-0.346318
hisB	EG10445	hisLGDCBHAFI	24.69	31.66	0.786589	-0.346318
hisC	EG10446	hisLGDCBHAFI	18.47	31.58	0.597606	-0.742734
hisD	EG10447	hisLGDCBHAFI	30.31	36.28	0.839861	-0.251778
hisF	EG10448	hisBHAFI	67.87	43.52	1.54695	0.629422
hisF	EG10448	hisLGDCBHAFI	67.87	43.52	1.54695	0.629422
hisG	EG10449	hisLGDCBHAFI	29.3	67.63	0.441498	-1.17952
hisH	EG10450	hisLGDCBHAFI	0	22.89	0.0418585	-4.57833
hisH	EG10450	hisBHAFI	0	22.89	0.0418585	-4.57833
hisI	EG10451	hisBHAFI	21.54	132.62	0.168687	-2.56758
hisI	EG10451	hisLGDCBHAFI	21.54	132.62	0.168687	-2.56758
hisJ	EG12124	argT-hisJQMP	50.51	25.91	1.91416	0.93671
hisJ	EG12124	hisJQMP	50.51	25.91	1.91416	0.93671
hisL	EG11269	hisLGDCBHAFI	0	0	1	0
hisM	EG10007	argT-hisJQMP	18.39	47.17	0.402533	-1.31282
hisM	EG10007	hisJQMP	18.39	47.17	0.402533	-1.31282
hisP	EG10452	argT-hisJQMP	8.52	26.22	0.349743	-1.51563
hisP	EG10452	hisJQMP	8.52	26.22	0.349743	-1.51563
hisQ	EG12125	argT-hisJQMP	38.38	59.07	0.655569	-0.609182
hisQ	EG12125	hisJQMP	38.38	59.07	0.655569	-0.609182
hisR	EG30042	argX-hisR-leuT-proM	0	87.84	0.0112562	-6.47314
hisS	EG10453	hisS	15.51	21.22	0.743024	-0.428519
hlpA	EG10455	hlpA-lpxD-fabZ-lpxA	40.69	97.42	0.423593	-1.23925
hlpA	EG10455	bamA-hlpA-lpxD-fabZ-lpxAB-rnhB-dnaE	40.69	97.42	0.423593	-1.23925
hlyE	EG13243	hlyE	14.46	51.91	0.292194	-1.775
hmp	EG10456	hmp	503.68	681.46	0.739501	-0.435376
hns	EG10457	hns	63.69	163.37	0.393563	-1.34533
hofB	EG12106	ppdD-hofBC	95.12	122	0.781463	-0.35575
hofC	EG11798	ppdD-hofBC	142.47	253	0.564843	-0.824079
hofM	EG12925	hofMNOP	0	17.34	0.0545256	-4.19692
hofN	EG12924	hofMNOP	12.21	50.1	0.258513	-1.95169
hofO	EG12923	hofMNOP	0	15.34	0.0611995	-4.03034
hofP	EG12922	hofMNOP	16.28	33.4	0.502326	-0.993305
hofQ	EG12113	hofQ	26.6	38.21	0.703902	-0.506553
hokA	EG12346	hokA	0	0	1	0
hokB	EG11240	hokB	2241.32	2795.57	0.801811	-0.318666
hokC	EG10373	mokC-hokC	0	0	1	0
hokC	EG10373	hokC	0	0	1	0
hokD	EG11130	hokD	42.26	43.36	0.975203	-0.0362258
hokD	EG11130	relBE-hokD	42.26	43.36	0.975203	-0.0362258
hokE	EG14302	hokE	43.09	0	44.09	5.46238
holA	EG11412	leuS-lptE-holA-nadD-cobC	102.2	150.74	0.680111	-0.556159
holB	EG11500	pabC-yceG-tmk-holB-ycfH	104.95	141.33	0.744397	-0.425856
holC	EG11413	holC-valS	296.94	182.8	1.621	0.696885
holC	EG11413	holC	296.94	182.8	1.621	0.696885
holD	EG11414	holD-rimI-yjjG	15.92	32.67	0.502525	-0.992734
holE	EG11505	holE	399.52	1024.77	0.390458	-1.35676
hpf	EG11681	lptB-rpoN-hpf-ptsN-yhbJ	526.45	704.53	0.747594	-0.419673
hpf	EG11681	rpoN-hpf-ptsN-yhbJ-npr	526.45	704.53	0.747594	-0.419673
hpt	EG20098	hpt	319.17	377.85	0.84511	-0.242789
hrpA	EG12936	hrpA	18.58	29.46	0.64281	-0.637535
hrpB	EG12329	hrpB	27.13	36.18	0.75659	-0.402417
hscA	EG12130	hscBA-fdx-iscX	21.37	32.89	0.660077	-0.599294
hscB	EG12131	hscBA-fdx-iscX	12.78	39.32	0.341766	-1.54892
hscC	EG13653	hscC	82.85	60.71	1.35877	0.442306
hsdM	EG10458	hsdRMS	45.61	68.06	0.67492	-0.567211
hsdM	EG10458	hsdMS	45.61	68.06	0.67492	-0.567211
hsdR	EG10459	hsdRMS	46.91	69.31	0.681411	-0.553403
hsdS	EG10460	hsdS	23.63	43.64	0.551747	-0.85792
hsdS	EG10460	hsdRMS	23.63	43.64	0.551747	-0.85792
hsdS	EG10460	hsdMS	23.63	43.64	0.551747	-0.85792
hslJ	EG13181	hslJ	6950.57	6251.82	1.11175	0.152832
hslO	EG12930	hslO	239.99	269.31	0.891532	-0.165642
hslO	EG12930	hslR-hslO	239.99	269.31	0.891532	-0.165642
hslR	EG12929	hslR-hslO	0	67.3	0.0146413	-6.09381
hslR	EG12929	yrfG-hslR	0	67.3	0.0146413	-6.09381
hslU	EG11881	hslVU	64.34	192.95	0.336891	-1.56965
hslV	EG11676	hslVU	24.83	89.16	0.286491	-1.80344
hspQ	EG13724	hspQ	2176.65	1063.44	2.04582	1.03268
hsrA	EG11732	hsrA	295.45	203.66	1.4485	0.53456
hsrA	EG11732	yieP-hsrA	295.45	203.66	1.4485	0.53456
htpG	EG10461	htpG	59.77	68.54	0.873886	-0.194484
htpX	EG10462	htpX	22.42	30.67	0.739501	-0.435376
htrE	EG11972	htrE	22.84	49.46	0.472453	-1.08176
htrE	EG11972	ecpD-htrE	22.84	49.46	0.472453	-1.08176
htrL	EG11188	htrL	0	15.77	0.0596303	-4.06781
hupA	EG10466	hupA	0	0	1	0
hupB	EG10467	hupB	96.59	148.65	0.652122	-0.616787
hyaA	EG10468	hyaABCDEF	17.67	48.35	0.378318	-1.40233
hyaB	EG10469	hyaABCDEF	25.72	52.78	0.496839	-1.00915
hyaC	EG10470	hyaABCDEF	18.62	66.87	0.289082	-1.79045
hyaD	EG10471	hyaABCDEF	22.42	23.01	0.975427	-0.0358943
hyaE	EG10472	hyaABCDEF	0	50.85	0.0192864	-5.69627
hyaF	EG10473	hyaABCDEF	23.05	7.88	2.70833	1.43741
hybA	EG11799	hybOABCDEFG	26.72	34.26	0.78616	-0.347105
hybB	EG11800	hybOABCDEFG	39.14	28.68	1.35243	0.435549
hybC	EG11801	hybOABCDEFG	30.95	47.63	0.657002	-0.606031
hybD	EG11802	hybOABCDEFG	53.27	40.99	1.29245	0.370109
hybE	EG11803	hybOABCDEFG	0	27.66	0.0348918	-4.84097
hybF	EG11804	hybOABCDEFG	38.55	19.78	1.90327	0.928482
hybG	EG11805	hybOABCDEFG	1323.72	1222.31	1.0829	0.114897
hybO	EG13006	hybOABCDEFG	17.67	18.13	0.975954	-0.0351149
hycA	EG10474	hycABCDEFGHI	85.61	102.48	0.836973	-0.256746
hycB	EG10475	hycABCDEFGHI	75.4	0	76.4	6.2555
hycC	EG10476	hycABCDEFGHI	10.82	37.02	0.310889	-1.68553
hycD	EG10477	hycABCDEFGHI	14.27	21.96	0.66507	-0.588422
hycE	EG10478	hycABCDEFGHI	69.39	94.93	0.733764	-0.446612
hycF	EG10479	hycABCDEFGHI	182.1	211.75	0.860635	-0.216527
hycG	EG10480	hycABCDEFGHI	25.75	61.65	0.426975	-1.22778
hycH	EG10481	hycABCDEFGHI	48.12	0	49.12	5.61824
hycI	EG13396	hycI	153.96	143.6	1.07165	0.0998283
hycI	EG13396	hycABCDEFGHI	153.96	143.6	1.07165	0.0998283
hydN	EG11552	hydN-hypF	49.94	64.05	0.78309	-0.35275
hyfA	EG11150	hyfABCDEFGHIJR-focB	53.33	43.78	1.21326	0.278895
hyfB	EG11282	hyfABCDEFGHIJR-focB	22.86	70.35	0.334408	-1.58032
hyfC	EG14211	hyfABCDEFGHIJR-focB	62.58	64.21	0.975004	-0.0365201
hyfD	EG14212	hyfABCDEFGHIJR-focB	45.78	32.88	1.38076	0.465458
hyfE	EG14213	hyfABCDEFGHIJR-focB	40.5	93.5	0.439153	-1.1872
hyfF	EG14214	hyfABCDEFGHIJR-focB	50.04	38.5	1.29215	0.369776
hyfG	EG14215	hyfABCDEFGHIJR-focB	118.56	72.99	1.61589	0.692333
hyfH	EG14216	hyfABCDEFGHIJR-focB	72.44	136.26	0.535043	-0.902273
hyfI	EG14217	hyfABCDEFGHIJR-focB	78.17	106.93	0.733531	-0.44707
hyfJ	EG14218	hyfABCDEFGHIJR-focB	0	16.34	0.0576701	-4.11603
hyfR	EG14219	hyfABCDEFGHIJR-focB	114.62	188.15	0.611261	-0.71014
hyi	EG11584	gcl-hyi-glxR-ybbVW-allB-ybbY-glxK	110.29	8.7	11.4732	3.5202
hypA	EG10483	hypABCDE	0	38.54	0.0252908	-5.30524
hypA	EG10483	hypABCDE-fhlA	0	38.54	0.0252908	-5.30524
hypB	EG10484	hypBCDE	22.65	108.46	0.216061	-2.21049
hypB	EG10484	hypABCDE-fhlA	22.65	108.46	0.216061	-2.21049
hypB	EG10484	hypBCDE-fhlA	22.65	108.46	0.216061	-2.21049
hypB	EG10484	hypABCDE	22.65	108.46	0.216061	-2.21049
hypC	EG10485	hypBCDE	0	49.55	0.0197824	-5.65964
hypC	EG10485	hypABCDE-fhlA	0	49.55	0.0197824	-5.65964
hypC	EG10485	hypBCDE-fhlA	0	49.55	0.0197824	-5.65964
hypC	EG10485	hypABCDE	0	49.55	0.0197824	-5.65964
hypD	EG10486	hypABCDE-fhlA	176.26	138.65	1.26932	0.344051
hypD	EG10486	hypABCDE	176.26	138.65	1.26932	0.344051
hypD	EG10486	hypBCDE-fhlA	176.26	138.65	1.26932	0.344051
hypD	EG10486	hypBCDE	176.26	138.65	1.26932	0.344051
hypE	EG10487	hypABCDE	97.81	120.42	0.813787	-0.297277
hypE	EG10487	hypABCDE-fhlA	97.81	120.42	0.813787	-0.297277
hypE	EG10487	hypBCDE	97.81	120.42	0.813787	-0.297277
hypE	EG10487	hypBCDE-fhlA	97.81	120.42	0.813787	-0.297277
hypF	EG11551	hydN-hypF	67.3	114.08	0.5935	-0.75268
hypF	EG11551	hypF	67.3	114.08	0.5935	-0.75268
hyuA	EG13056	hyuA	137.93	185.43	0.745213	-0.424276
iaaA	EG12407	iaaA-gsiABCD	13.65	7	1.83125	0.872829
iadA	EG12567	iadA	129.26	92.26	1.39674	0.482064
iadA	EG12567	yjiHG-iadA	129.26	92.26	1.39674	0.482064
iap	EG10488	iap	171.47	182.44	0.940198	-0.0889628
ibpA	EG11534	ibpAB	79.62	32.67	2.39442	1.25967
ibpB	EG11535	ibpAB	399.52	409.91	0.974715	-0.0369482
ibpB	EG11535	ibpB	399.52	409.91	0.974715	-0.0369482
icd	EG10489	icd	94.85	64.88	1.45492	0.540938
icdC	EG10009	icdC	79.9	40.99	1.92665	0.946094
iclR	EG10491	iclR	95.89	98.38	0.974945	-0.0366077
idi	EG13072	idi	12.01	86.24	0.149129	-2.74537
idnD	EG12541	idnDOTR	31.94	19.66	1.59439	0.673
idnK	EG12152	idnK	409.09	155.9	2.6137	1.3861
idnO	EG12540	idnDOTR	25.85	61.89	0.426936	-1.22791
idnR	EG12538	idnR	85.78	182.8	0.472144	-1.0827
idnR	EG12538	idnDOTR	85.78	182.8	0.472144	-1.0827
idnT	EG12539	idnDOTR	84.9	143.47	0.594587	-0.75004
ihfA	EG10440	thrS-infC-rpmI-rplT-pheMST-ihfA	153.82	112.72	1.36141	0.445106
ihfA	EG10440	ihfA	153.82	112.72	1.36141	0.445106
ihfA	EG10440	pheMST-ihfA	153.82	112.72	1.36141	0.445106
ihfB	EG10441	rpsA-ihfB	138.78	237.31	0.586547	-0.769682
ihfB	EG10441	ihfB	138.78	237.31	0.586547	-0.769682
ileS	EG10492	ileS-lspA-fkpB-ispH	23.4	16.81	1.37002	0.454194
ileS	EG10492	ribF-ileS-lspA-fkpB-ispH	23.4	16.81	1.37002	0.454194
ileT	EG30043	rrsA-ileT-alaT-rrlA-rrfA	0	0	1	0
ileU	EG30044	rrsD-ileU-alaU-rrlD-rrfD-thrV-rrfF	0	175.67	0.00566027	-7.46491
ileV	EG30045	rrsH-ileV-alaV-rrlH-rrfH	0	0	1	0
ileX	EG30046	ileX	0	266.98	0.00373162	-8.06598
ileY	EG31121	ileY	86.74	0	87.74	6.45516
ilvA	EG10493	ilvEDA	341.34	376.48	0.906909	-0.14097
ilvA	EG10493	ilvLXG_1G_2MEDA	341.34	376.48	0.906909	-0.14097
ilvA	EG10493	ilvA	341.34	376.48	0.906909	-0.14097
ilvB	EG10494	ivbL-ilvBN-uhpABC	35.13	56.06	0.633193	-0.659282
ilvB	EG10494	ivbL-ilvBN	35.13	56.06	0.633193	-0.659282
ilvC	EG10495	ilvC	49.13	82.48	0.600503	-0.735756
ilvD	EG10496	ilvEDA	10.68	25.58	0.439428	-1.1863
ilvD	EG10496	ilvLXG_1G_2MEDA	10.68	25.58	0.439428	-1.1863
ilvE	EG10497	ilvLXG_1G_2MEDA	21.26	65.45	0.334989	-1.57782
ilvE	EG10497	ilvEDA	21.26	65.45	0.334989	-1.57782
ilvG_1	EG10498	ilvLXG_1G_2MEDA	68.13	102.79	0.666056	-0.586284
ilvG_2	EG10498	ilvLXG_1G_2MEDA	68.13	102.79	0.666056	-0.586284
ilvH	EG10499	ilvIH	40.2	0	41.2	5.36457
ilvI	EG10500	ilvIH	30.57	74.5	0.418146	-1.25792
ilvL	EG11270	ilvLXG_1G_2MEDA	66.59	0	67.59	6.07874
ilvM	EG10501	ilvLXG_1G_2MEDA	0	25.62	0.0375657	-4.73444
ilvN	EG10502	ivbL-ilvBN-uhpABC	22.65	69.73	0.33437	-1.58048
ilvN	EG10502	ivbL-ilvBN	22.65	69.73	0.33437	-1.58048
ilvX	EG14474	ilvLXG_1G_2MEDA	0	0	1	0
ilvY	EG10503	ilvY	88.48	121.05	0.733142	-0.447835
inaA	EG11422	inaA	202.52	114.28	1.76544	0.820028
infA	EG10504	infA	180.61	185.3	0.974826	-0.036784
infB	EG10505	rimP-nusA-infB	19.73	32.89	0.611685	-0.70914
infB	EG10505	metY-yhbC-nusA-infB-rbfA-truB-rpsO-pnp	19.73	32.89	0.611685	-0.70914
infB	EG10505	metY-yhbC-nusA-infB	19.73	32.89	0.611685	-0.70914
infC	EG10506	infC	109.26	112.1	0.97489	-0.0366894
infC	EG10506	thrS-infC	109.26	112.1	0.97489	-0.0366894
infC	EG10506	thrS-infC-rpmI-rplT-pheMST-ihfA	109.26	112.1	0.97489	-0.0366894
infC	EG10506	infC-rpmI-rplT	109.26	112.1	0.97489	-0.0366894
insJ	EG40010	insJ	37.89	90.7	0.4241	-1.23752
insK	EG40011	insK	77.37	63.51	1.21485	0.280779
intA	EG11783	intA	90.23	174.26	0.520541	-0.941916
intB	EG12364	intB	135.38	197.67	0.686465	-0.542742
intD	EG10507	intD	135.92	522.95	0.261323	-1.9361
intE	EG12370	ymfH-xisE-intE	122.73	251.83	0.48938	-1.03097
intF	EG13554	intF	663.45	859.31	0.772338	-0.372696
intQ	EG13188	dicB-ydfDE-insD-intD	182.17	105.13	1.7259	0.787351
intR	EG13358	recET-lar-ydaCQ-intR	16	54.72	0.305097	-1.71266
intR	EG13358	intR	16	54.72	0.305097	-1.71266
intS	EG12413	intS	170.78	239.47	0.714351	-0.485295
intZ	EG14172	intZ	223.55	419.57	0.533918	-0.905309
iraD	EG12565	iraD	67.1	361.41	0.187909	-2.4119
iraM	EG13885	iraM	0	0	1	0
iraP	EG11256	iraP	0	25.91	0.0371609	-4.75007
iscA	EG12132	iscA	20.35	0	21.35	4.41616
iscA	EG12132	iscRSUA	20.35	0	21.35	4.41616
iscR	EG13397	iscRSUA	296.58	179.81	1.64582	0.718803
iscS	EG12677	iscRSUA	54.26	77.93	0.700114	-0.514338
iscU	EG13395	iscRSUA	68.14	87.38	0.782304	-0.354199
iscX	EG12311	iscX	163.98	403.79	0.407569	-1.29488
iscX	EG12311	hscBA-fdx-iscX	163.98	403.79	0.407569	-1.29488
ispA	EG10508	xseB-ispA-dxs-yajO	73.25	52.6	1.38526	0.470158
ispB	EG10017	ispB	33.91	83.5	0.413136	-1.27531
ispD	EG13110	ispDF	27.81	76.1	0.373671	-1.42016
ispE	EG11294	lolB-ispE-prs	77.37	119.08	0.652648	-0.615622
ispF	EG11816	ispDF	123.6	112.72	1.09567	0.131818
ispF	EG11816	ispF	123.6	112.72	1.09567	0.131818
ispG	EG10370	ispG-sroE	23.56	18.13	1.28385	0.360474
ispH	EG11081	ribF-ileS-lspA-fkpB-ispH	20.8	21.34	0.975828	-0.0353011
ispH	EG11081	ileS-lspA-fkpB-ispH	20.8	21.34	0.975828	-0.0353011
ispH	EG11081	lsp-fkpB-ispH	20.8	21.34	0.975828	-0.0353011
ispU	EG13329	ispU	0	26.63	0.0361925	-4.78816
isrC	EG31150	isrC	32.31	66.31	0.494874	-1.01487
istR-2	EG31167	istR-2	188.35	338.17	0.558275	-0.840953
ivbL	EG11275	ivbL-ilvBN-uhpABC	0	204.95	0.00485555	-7.68615
ivbL	EG11275	ivbL-ilvBN	0	204.95	0.00485555	-7.68615
ivy	EG13547	ivy	111.26	85.61	1.29616	0.374238
katE	EG10509	katE	78.69	86.71	0.908562	-0.138343
katG	EG10511	katG	30.23	55.82	0.54963	-0.863466
kbaY	EG12768	agaSYBCDI	145.47	125.69	1.15613	0.209303
kbaZ	EG12763	kbaZ-agaVWA	128.65	95.04	1.34996	0.432915
kbl	EG10512	kbl-tdh	5.51	5.65	0.978947	-0.0306968
kch	EG11606	kch	115.65	242.71	0.478643	-1.06298
kdgK	EG12253	kdgK	113.41	87.27	1.29614	0.374218
kdgR	EG14018	kdgR	24.97	42.7	0.594279	-0.750787
kdgT	EG11869	kdgT	73.69	96.23	0.768179	-0.380486
kdpA	EG10513	kdpFABC	7.88	12.12	0.676829	-0.563136
kdpB	EG10514	kdpFABC	19.3	29.71	0.661022	-0.597229
kdpC	EG10515	kdpFABC	0	11.8	0.078125	-3.67807
kdpD	EG10516	kdpDE	36.83	32.75	1.12089	0.164643
kdpE	EG10517	kdpDE	29.17	49.88	0.592964	-0.753984
kdpE	EG10517	kdpE	29.17	49.88	0.592964	-0.753984
kdpF	EG12126	kdpFABC	0	0	1	0
kdsA	EG10518	ychQA-kdsA	15.42	39.55	0.404932	-1.30425
kdsA	EG10518	kdsA	15.42	39.55	0.404932	-1.30425
kdsB	EG10519	ycaR-kdsB	300.04	208.25	1.43866	0.524728
kdsC	EG12804	yrbG-kdsDC-lptCAB	58.13	71.57	0.8148	-0.295483
kdsC	EG12804	kdsC-lptCAB	58.13	71.57	0.8148	-0.295483
kdsD	EG12803	yrbG-kdsDC-lptCAB	60.11	109.64	0.552332	-0.856393
kdsD	EG12803	yrbG-kdsD	60.11	109.64	0.552332	-0.856393
kduD	EG12361	kduD	614.23	239.65	2.55653	1.35419
kduI	EG13096	kduI	149.64	242.42	0.618848	-0.692343
kefA	EG14240	kefA	78.41	92.51	0.849214	-0.2358
kefB	EG20110	kefGB-yheV	21.9	48.69	0.460857	-1.11761
kefC	EG10521	kefFC	56.62	65.35	0.868425	-0.203527
kefF	EG11568	kefFC	24.83	12.74	1.87991	0.910666
kefG	EG12902	kefGB-yheV	11.88	12.19	0.976497	-0.0343119
kgtP	EG10522	kgtP	263.89	380.09	0.695085	-0.524738
kilR	EG12155	kilR-ydaE	29.69	60.93	0.49556	-1.01287
kptA	EG12570	kptA	35.63	60.93	0.591474	-0.757613
kup	EG11541	kup	59.96	83.23	0.723733	-0.466471
lacA	EG10524	lacYA	43.09	77.36	0.56266	-0.829666
lacA	EG10524	lacZYA	43.09	77.36	0.56266	-0.829666
lacI	EG10525	mhpR-lacI	9258.2	34148.4	0.271138	-1.8829
lacI	EG10525	lacI	9258.2	34148.4	0.271138	-1.8829
lacY	EG10526	lacYA	21.03	107.87	0.202351	-2.30507
lacY	EG10526	lacZYA	21.03	107.87	0.202351	-2.30507
lacZ	EG10527	lacZYA	2133.06	6103.62	0.349581	-1.5163
lafU	EG13143	lafU	52.32	89.46	0.589432	-0.762603
lamB	EG10528	malK-lamB-malM	122.9	181.57	0.678644	-0.559274
lar	EG11900	recET-lar-ydaCQ-intR	0	104.05	0.00951928	-6.71493
ldcA	EG13898	ldcA	345.82	384.37	0.899966	-0.152057
ldcC	EG13219	ldcC	76.94	97.88	0.788228	-0.343315
ldhA	EG13186	ldhA	93.22	143.47	0.652177	-0.616665
ldrA	EG14403	ldrA	1953.22	2317.12	0.843019	-0.246362
ldrB	EG14404	ldrB	244.15	626.25	0.390833	-1.35538
ldrC	EG14405	ldrC	2441.53	3005.99	0.812284	-0.299944
ldrD	EG14406	ldrD	183.11	563.62	0.326078	-1.61671
lepA	EG10529	lepAB	32.96	15.03	2.11853	1.08306
lepB	EG10530	lepAB	20.28	48.56	0.429379	-1.21968
lepB	EG10530	lepB	20.28	48.56	0.429379	-1.21968
leuA	EG11226	leuLABCD	117.42	154.89	0.759638	-0.396616
leuB	EG11577	leuLABCD	66.4	61.94	1.07086	0.0987715
leuC	EG11576	leuLABCD	37.64	62.76	0.606023	-0.722557
leuD	EG11575	leuD	217.56	267.86	0.812914	-0.298826
leuD	EG11575	leuLABCD	217.56	267.86	0.812914	-0.298826
leuE	EG13505	leuE	10.32	42.34	0.261191	-1.93683
leuL	EG11280	leuLABCD	0	0	1	0
leuO	EG10531	leuO	97.66	121.67	0.804272	-0.314245
leuP	EG30047	leuQPV	0	77.74	0.0127	-6.29902
leuQ	EG30048	leuQPV	0	0	1	0
leuS	EG10532	leuS-lptE-holA-nadD-cobC	38.28	68.08	0.568616	-0.814473
leuT	EG30049	argX-hisR-leuT-proM	0	77.74	0.0127	-6.29902
leuU	EG30050	leuU	0	77.74	0.0127	-6.29902
leuU	EG30050	secG-leuU	0	77.74	0.0127	-6.29902
leuV	EG30051	leuQPV	0	77.74	0.0127	-6.29902
leuV	EG30051	leuV	0	77.74	0.0127	-6.29902
leuW	EG30052	metT-leuW-glnUW-metU-glnVX	232.66	0	233.66	7.86827
leuX	EG30053	leuX	0	79.57	0.0124116	-6.33217
leuZ	EG30054	cysT-leuZ	0	0	1	0
leuZ	EG30054	glyW-cysT-leuZ	0	0	1	0
lexA	EG10533	lexA-dinF	10.82	11.11	0.976053	-0.0349688
lfhA	EG13144	lfhA	107.75	130.29	0.828319	-0.271742
lgt	EG12128	lgt-thyA	52.68	46.33	1.13416	0.18163
lhgO	EG12387	csiD-ygaF-gabDTP	5.19	31.98	0.18769	-2.41358
lhr	EG11548	rnt-lhr	102.8	70.32	1.45541	0.541428
lhr	EG11548	lhr	102.8	70.32	1.45541	0.541428
ligA	EG10534	ligA-ypeB	26.16	33.55	0.786107	-0.347202
ligB	EG11334	ligB	58.75	128.6	0.461034	-1.11706
ligT	EG12330	ligT	297.95	585.91	0.509363	-0.973235
lipA	EG11306	lipA	150.13	196.04	0.767002	-0.382698
lipB	EG11591	ybeD-lipB	82.14	63.21	1.29481	0.372745
lipB	EG11591	lipB	82.14	63.21	1.29481	0.372745
lit	EG10535	lit	309.7	1626.56	0.190899	-2.38912
livF	EG10536	livKHMGF	36.93	56.84	0.655775	-0.608728
livG	EG10537	livKHMGF	0	44.03	0.0222074	-5.49281
livH	EG10538	livKHMGF	21.33	7.3	2.69036	1.4278
livJ	EG10539	livJ	149.28	196.04	0.762688	-0.390835
livK	EG10540	livKHMGF	35.63	54.84	0.655981	-0.608273
livM	EG10541	livKHMGF	5.16	37.05	0.161892	-2.62689
lldD	EG11963	lldPRD	55.35	79.5	0.7	-0.514573
lldP	EG11961	lldPRD	35.83	32.67	1.09385	0.129418
lldR	EG11962	lldPRD	220.59	139.27	1.57974	0.659686
lnt	EG10168	lnt	595.39	1015.18	0.586894	-0.768828
lnt	EG10168	ybeX-lnt	595.39	1015.18	0.586894	-0.768828
lnt	EG10168	ybeZYX-lnt	595.39	1015.18	0.586894	-0.768828
lolA	EG12684	lolA-rarA	86.17	187.87	0.461534	-1.11549
lolB	EG11293	lolB-ispE-prs	84.51	108.39	0.781699	-0.355316
lolC	EG13439	lolCDE	5.49	11.27	0.528932	-0.918845
lolD	EG13440	lolCDE	0	0	1	0
lolE	EG13441	lolCDE	52.95	70.62	0.753281	-0.40874
lomR_2	EG14315	lomR_2-stfR-tfaR	94.17	193.24	0.489961	-1.02926
lon	EG10542	clpX-lon	11.2	28.72	0.410498	-1.28455
lon	EG10542	lon	11.2	28.72	0.410498	-1.28455
lpcA	EG13146	lpcA	45.54	46.73	0.975068	-0.0364251
lpd	EG10543	lpdA	41.63	80.69	0.521851	-0.93829
lpd	EG10543	pdhR-aceEF-lpdA	41.63	80.69	0.521851	-0.93829
lplA	EG11796	ytjB-lplA	142.6	259.37	0.551523	-0.858507
lplA	EG11796	lplA	142.6	259.37	0.551523	-0.858507
lplT	EG12455	aas-lplT	248.45	334.21	0.74416	-0.426314
lplT	EG12455	lplT	248.45	334.21	0.74416	-0.426314
lpoA	EG12778	yraM	177.99	146.09	1.21687	0.28318
lpoB	EG13431	hinT-ycfL-lpoB-thiK-nagZ-ycfP	92.41	126.42	0.733087	-0.447943
lpp	EG10544	lpp	1112.6	1455.43	0.764609	-0.387205
lptA	EG12618	yrbG-kdsDC-lptCAB	59.07	206.06	0.290109	-1.78533
lptA	EG12618	lptAB	59.07	206.06	0.290109	-1.78533
lptA	EG12618	kdsC-lptCAB	59.07	206.06	0.290109	-1.78533
lptB	EG11680	kdsC-lptCAB	272.4	316.75	0.860425	-0.216879
lptB	EG11680	lptAB	272.4	316.75	0.860425	-0.216879
lptB	EG11680	yrbG-kdsDC-lptCAB	272.4	316.75	0.860425	-0.216879
lptB	EG11680	lptB-rpoN-hpf-ptsN-yhbJ	272.4	316.75	0.860425	-0.216879
lptC	EG12806	yrbG-kdsDC-lptCAB	137.34	187.87	0.732461	-0.449175
lptC	EG12806	kdsC-lptCAB	137.34	187.87	0.732461	-0.449175
lptD	EG11569	imp	111.97	195.29	0.575526	-0.797047
lptD	EG11569	imp-surA-pdxA	111.97	195.29	0.575526	-0.797047
lptE	EG10855	leuS-lptE-holA-nadD-cobC	45.31	46.48	0.975358	-0.0359961
lptF	EG12535	lptFG	101.79	122.86	0.829889	-0.26901
lptG	EG12536	lptFG	85.22	87.43	0.975008	-0.0365133
lpxA	EG10545	hlpA-lpxD-fabZ-lpxA	16.71	34.29	0.501842	-0.994695
lpxA	EG10545	bamA-hlpA-lpxD-fabZ-lpxAB-rnhB-dnaE	16.71	34.29	0.501842	-0.994695
lpxB	EG10546	bamA-hlpA-lpxD-fabZ-lpxAB-rnhB-dnaE	17.21	94.18	0.191322	-2.38593
lpxC	EG10265	mraZW-ftsLI-murEF-mraY-murD-ftsW-murGC-ddlB-ftsQAZ-lpxC	35.9	110.51	0.330912	-1.59548
lpxC	EG10265	mraW-ftsLI-murEF-mraY-murD-ftsW-murGC-ddlB-ftsQAZ-lpxC	35.9	110.51	0.330912	-1.59548
lpxC	EG10265	ftsLI-murEF-mraY-murD-ftsW-murGC-ddlB-ftsQAZ-lpxC	35.9	110.51	0.330912	-1.59548
lpxC	EG10265	lpxC	35.9	110.51	0.330912	-1.59548
lpxD	EG10316	lpxD	64.25	118.66	0.545295	-0.874891
lpxD	EG10316	hlpA-lpxD-fabZ-lpxA	64.25	118.66	0.545295	-0.874891
lpxD	EG10316	bamA-hlpA-lpxD-fabZ-lpxAB-rnhB-dnaE	64.25	118.66	0.545295	-0.874891
lpxH	EG12666	ppiB-lpxH	9.12	28.06	0.348245	-1.52183
lpxK	EG11409	ycaI-msbA-lpxK-ycaQ	20.04	13.71	1.43032	0.516338
lpxL	EG10464	lpxL	107.36	110.15	0.974899	-0.0366757
lpxM	EG10614	lpxM	67.82	76.54	0.887542	-0.172113
lpxP	EG12901	lpxP	114.52	183.59	0.625819	-0.676182
lpxT	EG14075	yeiR-lpxT	203.12	123.14	1.64427	0.717449
lrhA	EG12123	lrhA	98.29	57.62	1.69379	0.760255
lrp	EG10547	lrp	39.95	54.65	0.735849	-0.442518
lspA	EG10548	ribF-ileS-lspA-fkpB-ispH	66.59	109.31	0.612728	-0.706682
lspA	EG10548	ileS-lspA-fkpB-ispH	66.59	109.31	0.612728	-0.706682
lspA	EG10548	lsp-fkpB-ispH	66.59	109.31	0.612728	-0.706682
lsrA	EG13806	lsrACDBFG-tam	42.92	52.84	0.81575	-0.2938
lsrB	EG13809	lsrACDBFG-tam	45.11	46.28	0.975254	-0.0361503
lsrC	EG13807	lsrACDBFG-tam	12.81	26.29	0.506046	-0.982659
lsrD	EG13808	lsrACDBFG-tam	26.55	61.3	0.442215	-1.17718
lsrF	EG13810	lsrACDBFG-tam	0	38.6	0.0252525	-5.30743
lsrG	EG13811	lsrACDBFG-tam	45.31	23.24	1.91048	0.933934
lsrK	EG13804	lsrK	37.24	63.69	0.591127	-0.75846
lsrK	EG13804	lsrRK	37.24	63.69	0.591127	-0.75846
lsrR	EG13805	lsrRK	20.73	56.72	0.376473	-1.40938
ltaE	EG13690	ltaE-ybjT	6.58	20.25	0.356706	-1.48719
ltaE	EG13690	poxB-ltaE-ybjT	6.58	20.25	0.356706	-1.48719
luxS	EG12712	luxS	63.88	65.54	0.975053	-0.036448
lysA	EG10549	lysA	260.97	230.27	1.13275	0.179823
lysC	EG10550	lysC	19.53	45.09	0.445433	-1.16672
lysP	EG11337	lysP	35.88	55.21	0.656111	-0.607988
lysQ	EG31122	lysQ	86.74	88.99	0.974997	-0.03653
lysR	EG10551	lysR	253.54	440.78	0.576169	-0.795436
lysS	EG10552	prfB-lysS	924.98	708.43	1.30525	0.384321
lysT	EG30055	lysT-valT-lysW	260.22	88.99	2.90277	1.53743
lysU	EG10553	lysU	108.57	138.12	0.787593	-0.344477
lysV	EG30056	valUXY-lysV	86.74	0	87.74	6.45516
lysW	EG30057	lysT-valT-lysW	0	0	1	0
lysY	EG31123	valZ-lysY	260.22	88.99	2.90277	1.53743
lysZ	EG31124	lysZ	0	88.99	0.0111123	-6.49169
lyxK	EG12284	yiaKLMNO-lyx-sgbHUE	8.81	13.55	0.674227	-0.568694
maa	EG14239	maa	155.25	159.28	0.974857	-0.0367382
macA	EG13694	macAB	0	24.24	0.0396197	-4.65764
macB	EG13695	macAB	128.66	211.9	0.609018	-0.715442
macB	EG13695	macB	128.66	211.9	0.609018	-0.715442
maeA	EG10948	maeA	50.47	51.78	0.97518	-0.0362595
maeB	EG14193	maeB	54.93	50.43	1.0875	0.121012
mak	EG11288	mak	36.26	22.32	1.59777	0.67606
malE	EG10554	malEFG	16.6	22.72	0.74199	-0.430529
malF	EG10555	malEFG	42.67	65.66	0.655115	-0.610179
malG	EG10556	malEFG	162.77	204.95	0.795193	-0.330623
malI	EG10557	malI	25.63	39.44	0.658506	-0.602731
malK	EG10558	malK-lamB-malM	17.72	36.36	0.501071	-0.996914
malM	EG10559	malK-lamB-malM	422.3	580.15	0.728383	-0.45723
malP	EG10560	malPQ	49.56	53.68	0.924653	-0.113017
malQ	EG10561	malQ	31.62	32.44	0.975479	-0.035818
malQ	EG10561	malPQ	31.62	32.44	0.975479	-0.035818
malS	EG11316	malS	126.58	139.87	0.905658	-0.142962
malT	EG10562	malT	97.44	119.97	0.813755	-0.297333
malX	EG10563	malXY	173.8	314.19	0.554586	-0.850517
malY	EG10564	malXY	28.1	109.55	0.263229	-1.92561
malZ	EG10565	malZ	148.91	152.78	0.974834	-0.0367712
manA	EG10566	manA	168.17	166.79	1.00822	0.0118171
manX	EG10567	manXYZ	94.95	180.92	0.52743	-0.922949
manY	EG10568	manXYZ	148.14	244.87	0.606581	-0.721228
manZ	EG10569	manXYZ	123.8	198.46	0.625689	-0.676482
map	EG10570	map-glnD-dapD	132.67	76.57	1.72322	0.785105
marA	EG11434	marRAB	171.67	176.13	0.974821	-0.0367912
marB	EG11599	marRAB	1113.74	988.27	1.12683	0.172271
marC	EG11637	marC	39.59	101.55	0.395807	-1.33713
marR	EG11435	marRAB	30.31	15.55	1.89184	0.919792
matA	EG14324	matA	0	22.89	0.0418585	-4.57833
matB	EG13565	matB	594.19	483.11	1.22945	0.298015
matC	EG13564	matC-yagXWV	19.71	20.22	0.975966	-0.0350971
matP	EG12855	matP	101.87	59.72	1.69417	0.760579
mazG	EG10572	mazG	16.65	34.16	0.501991	-0.994267
mazG	EG10572	mazEFG	16.65	34.16	0.501991	-0.994267
mcbA	EG13318	mcbA	101.03	103.65	0.974964	-0.0365789
mcbR	EG13773	mcbR	89.08	101.55	0.878401	-0.187049
mcrA	EG10573	mcrA	7.9	8.11	0.976948	-0.0336456
mcrB	EG10574	mcrBC	105.09	117.63	0.894293	-0.16118
mcrC	EG10575	mcrC	6.3	19.38	0.358194	-1.48119
mcrC	EG10575	mcrBC	6.3	19.38	0.358194	-1.48119
mdaB	EG12656	mdaB	90.61	197.56	0.461372	-1.116
mdh	EG10576	mdh	28.08	57.62	0.496076	-1.01137
mdlA	EG11622	mdlAB	22.31	30.52	0.73953	-0.435319
mdlB	EG14374	mdlAB	11.1	30.36	0.385842	-1.37392
mdoB	EG12591	mdoB	46.02	82.63	0.562238	-0.830746
mdoC	EG13876	mdoC	301.71	344.6	0.875897	-0.191167
mdoD	EG12859	mdoD	35.83	53.09	0.680902	-0.55448
mdoG	EG11885	mdoGH	25.75	57.24	0.459306	-1.12247
mdoH	EG11886	mdoGH	59.6	71.78	0.832646	-0.264224
mdtA	EG14056	mdtABCD-baeSR	47.54	124.65	0.386311	-1.37216
mdtB	EG14057	mdtABCD-baeSR	67.55	123.44	0.550868	-0.860222
mdtC	EG14058	mdtABCD-baeSR	27.84	37.36	0.751825	-0.411532
mdtD	EG12136	mdtABCD-baeSR	37.24	76.42	0.493929	-1.01762
mdtE	EG12240	mdtEF	148.01	128.49	1.15075	0.202568
mdtE	EG12240	gadE-mdtEF	148.01	128.49	1.15075	0.202568
mdtF	EG12241	mdtEF	167.24	167.24	1	0
mdtF	EG12241	gadE-mdtEF	167.24	167.24	1	0
mdtG	EG11343	mdtG	59.1	88.2	0.673767	-0.569679
mdtH	EG13878	mdtH	16.36	16.78	0.976378	-0.0344884
mdtI	EG13926	mdtJI	1098.69	1106.75	0.992724	-0.0105355
mdtJ	EG13927	mdtJI	54.03	36.96	1.44968	0.535738
mdtK	EG12400	mdtK	954.76	477.48	1.99749	0.99819
mdtL	EG11720	mdtL	33.63	115.03	0.298457	-1.7444
mdtM	EG12576	mdtM-yjiN	32.08	71.31	0.457475	-1.12824
mdtQ	EG12020	mdtQ	4.59	23.55	0.227699	-2.1348
melA	EG10577	melAB	53.48	99.76	0.540691	-0.887124
melB	EG10578	melAB	213.25	309.16	0.690772	-0.533717
melR	EG11230	melR	1878.29	349.71	5.35853	2.42184
menA	EG11880	menA-rraA	35.56	36.48	0.975454	-0.0358548
menB	EG11368	menBCE	7.68	7.88	0.977477	-0.0328647
menB	EG11368	menFD-yfbB-menBCE	7.68	7.88	0.977477	-0.0328647
menB	EG11368	menD-yfbB-menBCE	7.68	7.88	0.977477	-0.0328647
menC	EG11532	menBCE	0	7.02	0.124688	-3.0036
menC	EG11532	menFD-yfbB-menBCE	0	7.02	0.124688	-3.0036
menC	EG11532	menD-yfbB-menBCE	0	7.02	0.124688	-3.0036
menD	EG10579	menD-yfbB-menBCE	23.67	28.33	0.841118	-0.249619
menD	EG10579	menFD-yfbB-menBCE	23.67	28.33	0.841118	-0.249619
menE	EG12437	menFD-yfbB-menBCE	102.09	89.78	1.1356	0.183458
menE	EG12437	menD-yfbB-menBCE	102.09	89.78	1.1356	0.183458
menE	EG12437	menBCE	102.09	89.78	1.1356	0.183458
menF	EG12362	menFD-yfbB-menBCE	122.08	151.34	0.80793	-0.307698
menH	EG12438	menFD-yfbB-menBCE	8.69	44.56	0.212687	-2.2332
menH	EG12438	menD-yfbB-menBCE	8.69	44.56	0.212687	-2.2332
mepA	EG10580	prmB-aroC-mepA-yfcAML	47.94	40.99	1.16552	0.220968
metA	EG10581	metA	361.5	399.99	0.904013	-0.145585
metB	EG10582	metBL	11.36	34.95	0.343811	-1.54031
metC	EG10583	metC	94.33	159.41	0.59429	-0.750762
metE	EG10584	metE	311.83	185.38	1.67845	0.747132
metF	EG10585	metF	421.72	356.77	1.18154	0.24067
metG	EG10586	metG	55.1	56.53	0.975143	-0.0363137
metH	EG10587	metH	48.31	58.75	0.825272	-0.277058
metI	EG11737	metNIQ	10.08	0	11.08	3.46989
metJ	EG10588	metJ	62.19	42.54	1.45131	0.537355
metK	EG10589	metK	51.37	29.28	1.72952	0.790375
metL	EG10590	metBL	16.26	16.68	0.976244	-0.0346858
metN	EG11621	metNIQ	63.88	58.98	1.08169	0.113292
metQ	EG11504	metNIQ	24.24	140.91	0.177859	-2.49119
metR	EG10591	metR	82.92	120.52	0.690586	-0.534107
metT	EG30058	metT-leuW-glnUW-metU-glnVX	2825.2	2108.1	1.34	0.422236
metU	EG30059	metT-leuW-glnUW-metU-glnVX	1284.18	263.51	4.85872	2.28058
metU	EG30059	glnW-metU-glnVX	1284.18	263.51	4.85872	2.28058
metV	EG30060	metZWV	85.61	263.51	0.327436	-1.61072
metW	EG31117	metZWV	85.61	439.19	0.196756	-2.34552
metY	EG30061	metY-yhbC-nusA-infB-rbfA-truB-rpsO-pnp	85.61	263.51	0.327436	-1.61072
metY	EG30061	metY-yhbC-nusA-infB	85.61	263.51	0.327436	-1.61072
metY	EG30061	metY	85.61	263.51	0.327436	-1.61072
metZ	EG30062	metZWV	85.61	263.51	0.327436	-1.61072
mfd	EG11619	mfd	15.3	33.36	0.474389	-1.07586
mglA	EG10592	mglAC	47.67	106.72	0.45182	-1.14618
mglA	EG10592	mglBAC	47.67	106.72	0.45182	-1.14618
mglB	EG10593	mglBAC	13.2	74.47	0.188154	-2.41001
mglC	EG10594	mglC	78.24	200.7	0.392861	-1.34791
mglC	EG10594	mglAC	78.24	200.7	0.392861	-1.34791
mglC	EG10594	mglBAC	78.24	200.7	0.392861	-1.34791
mgrB	EG14383	mgrB	91.56	422.72	0.218446	-2.19465
mgrR	EG31184	mgrR	1076.27	966.21	1.11379	0.155479
mgsA	EG12307	mgsA	1034.06	913.58	1.13173	0.178533
mgtA	EG12525	mgtA	114.88	157.99	0.728851	-0.456305
mgtL	EG14498	mgtA	0	0	1	0
mhpA	EG20273	mhpABCDFE	7.92	16.25	0.517101	-0.951481
mhpB	EG20274	mhpABCDFE	0	42.94	0.0227583	-5.45746
mhpC	EG20275	mhpABCDFE	29.9	53.68	0.565106	-0.823406
mhpD	EG14274	mhpABCDFE	24.42	33.4	0.738953	-0.436445
mhpE	EG13292	mhpABCDFE	13	20.01	0.666349	-0.585649
mhpF	EG13625	mhpABCDFE	0	35.56	0.0273523	-5.19219
mhpR	EG20276	mhpR-lacI	31.62	72.99	0.44087	-1.18157
mhpT	EG13293	mhpT	32.63	33.48	0.975348	-0.0360109
miaA	EG10595	miaA-hfq-hflXKC	20.8	64.01	0.335333	-1.57633
miaA	EG10595	yjeFE-amiB-mutL-miaA-hfq-hflXKC	20.8	64.01	0.335333	-1.57633
miaA	EG10595	mutL-miaA-hfq-hflXKC	20.8	64.01	0.335333	-1.57633
miaA	EG10595	yjeE-amiB-mutL-miaA-hfq-hflXKC	20.8	64.01	0.335333	-1.57633
miaB	EG13657	miaB	78.64	99.67	0.7911	-0.338069
micA	EG31156	micA	53328.6	48384.9	1.10217	0.140352
micC	EG31144	micC	907.17	434.35	2.08607	1.06079
micF	EG30063	micF	496.18	509.08	0.97471	-0.0369553
minC	EG10596	minCDE	37.89	58.31	0.655707	-0.608876
minD	EG10597	minCDE	64.87	33.28	1.92153	0.942255
minE	EG10598	minE	98.76	101.33	0.974885	-0.0366958
minE	EG10598	minCDE	98.76	101.33	0.974885	-0.0366958
mioC	EG11199	mioC	133.62	533.16	0.252022	-1.98838
mioC	EG11199	asnC-mioC-mnmG	133.62	533.16	0.252022	-1.98838
mioC	EG11199	asnC-mioC	133.62	533.16	0.252022	-1.98838
mipA	EG13492	mipA	105.9	226.35	0.4702	-1.08865
mlaA	EG14276	mlaA	26.16	8.95	2.72965	1.44872
mlaB	EG12797	mlaFEDCB	22.42	23.01	0.975427	-0.0358943
mlaC	EG12798	mlaFEDCB	31.09	63.81	0.49514	-1.01409
mlaD	EG12799	mlaFEDCB	11.94	49.01	0.258748	-1.95038
mlaE	EG12800	mlaFEDCB	8.42	0	9.42	3.23573
mlaF	EG12801	mlaFEDCB	24.42	41.75	0.59462	-0.74996
mliC	EG11488	mliC	179.79	81.98	2.17872	1.12348
mlrA	EG12008	mlrA	459.29	498.94	0.92069	-0.119212
mltA	EG13085	mltA	30.02	73.92	0.414042	-1.27215
mltB	EG12699	mltB	30.35	31.14	0.97542	-0.0359044
mltC	EG12986	yggX-mltC-nupG	91.56	131.51	0.698513	-0.51764
mltC	EG12986	mutY-yggX-mltC	91.56	131.51	0.698513	-0.51764
mltC	EG12986	mutY-yggX-mltC-nupG	91.56	131.51	0.698513	-0.51764
mltC	EG12986	yggX-mltC	91.56	131.51	0.698513	-0.51764
mltD	EG10246	mltD	198.88	214	0.929674	-0.105203
mltF	EG11373	mltF	232.86	308.42	0.755801	-0.403921
mmuM	EG13343	mmuPM	42.39	57.99	0.735548	-0.443108
mmuP	EG13342	mmuPM	14.09	14.45	0.976699	-0.034014
mngA	EG13235	mngAB	10	17.11	0.607399	-0.719283
mngB	EG13236	mngAB	107.62	128.39	0.839478	-0.252436
mngR	EG11109	mngR	136.77	130.97	1.04395	0.0620518
mnmA	EG11344	mnmA	11.91	36.66	0.342804	-1.54454
mnmC	EG14114	trmC	52.55	155.02	0.343225	-1.54277
mnmE	EG10997	mnmE	82.1	133.78	0.61656	-0.697686
mnmG	EG10375	asnC-mioC-mnmG	87.2	135.99	0.643843	-0.63522
mnmG	EG10375	mnmG-rsmG	87.2	135.99	0.643843	-0.63522
[truncated: 3,120 more rows]

## Sheet: All Nac Binding
Position
Start	Stop	Max_Pos	Coverage	Type
1402440	1402823	1402601	857.284	intergenic
4267800	4268154	4268010	393.827	genic
357778	358124	357921	388.425	intergenic
3924870	3925306	3925040	317.071	intergenic
3656411	3657081	3656717	227.559	genic
3705976	3706368	3706169	222.315	intergenic
753814	754149	753984	207.945	intergenic
1445218	1445659	1445404	201.173	intergenic
4574997	4575408	4575238	168.197	genic
2510740	2511112	2510922	162.929	intergenic
1905288	1906284	1905859	152.031	intergenic
398444	398839	398628	146.22	intergenic
4291967	4292475	4292324	140.425	intergenic
3371529	3371848	3371698	135.268	intergenic
2126755	2127102	2126911	133.339	genic
2786548	2787068	2786903	129	intergenic
1994616	1995125	1994971	109.465	intergenic
3965554	3965886	3965714	101.48	intergenic
1800431	1800747	1800583	100.701	genic
606455	606783	606613	95.5197	intergenic
3181481	3181849	3181614	90.5433	intergenic
3048693	3049162	3048847	87.4173	intergenic
1922882	1923190	1923027	86.8583	intergenic
2050145	2050711	2050495	82.063	genic
3790449	3790942	3790737	80.4567	intergenic
2059037	2059962	2059466	75.6063	genic
1509297	1509666	1509484	75.5512	intergenic
2127907	2128281	2128058	75.315	genic
4047695	4048050	4047837	74.1575	intergenic
188518	188839	188663	70.7323	intergenic
3056336	3057045	3056505	67.0236	intergenic
4225462	4225777	4225620	66.2283	intergenic
3947581	3947907	3947737	66.063	genic
4368358	4368654	4368508	65.7638	intergenic
3833752	3834261	3834129	65.0551	intergenic
4274035	4274347	4274188	59.5748	genic
4063635	4063954	4063804	59.252	intergenic
1984518	1985030	1984800	58.5197	intergenic
2782342	2782693	2782518	55.6457	genic
903554	903867	903693	55.4646	intergenic
1225673	1225981	1225851	54.4567	genic
3183078	3183573	3183243	51.9528	intergenic
2133719	2134001	2133864	51.4016	genic
1584408	1584714	1584563	50.4331	intergenic
800961	801266	801131	45.8898	genic
1675802	1676105	1675942	44.8504	intergenic
2008423	2008753	2008548	44.6142	intergenic
3352070	3352634	3352237	43.8583	intergenic
1298392	1298743	1298530	43.5039	intergenic
1653588	1653869	1653733	43.0787	intergenic
230887	231181	231046	43.0472	intergenic
3359380	3359687	3359538	42.6142	genic
3948133	3948435	3948282	42.3937	intergenic
2267580	2267922	2267760	41.811	intergenic
3881857	3882292	3882052	41.2126	intergenic
4198156	4198442	4198309	40.9055	genic
4280783	4281251	4281095	39.9528	genic
2135421	2135916	2135573	39.7559	intergenic
4067026	4067375	4067149	38.0787	genic
2296140	2296430	2296283	37.8189	intergenic
1426792	1427095	1426931	37.4488	intergenic
2226800	2227105	2226955	36.8031	intergenic
3901094	3901371	3901234	36.5354	genic
3894587	3894889	3894738	36.5276	intergenic
83994	84300	84123	36.3543	intergenic
3315671	3315968	3315820	36.1969	genic
353907	354193	354012	35.7402	intergenic
381956	382244	382098	35.0551	genic
1698822	1699114	1698988	34.3543	genic
3900110	3900414	3900261	34.2835	intergenic
1993329	1993843	1993480	33.811	intergenic
1012962	1013245	1013088	32.8346	genic
1616825	1617115	1616976	32.5827	intergenic
1066897	1067244	1067128	31.9764	intergenic
4273650	4273967	4273802	31.6299	genic
1159272	1159562	1159407	31	genic
770200	770539	770368	30.8976	intergenic
502501	502792	502656	30.8268	intergenic
154276	154582	154413	30.6378	genic
3794338	3794840	3794699	30.4409	genic
2065506	2065802	2065630	29.8976	genic
4374387	4374679	4374493	29.5669	intergenic
2036754	2037020	2036914	28.7874	intergenic
2938976	2939252	2939134	26.9685	genic
2108043	2108344	2108210	26.7953	genic
3981993	3982270	3982132	26.4173	genic
3891586	3891909	3891747	26.3622	genic
4151006	4151459	4151331	26.3543	intergenic
706489	706755	706624	26.3465	genic
4532473	4532764	4532625	26.1181	genic
2984344	2984670	2984485	25.685	genic
3116372	3116648	3116506	25.3386	genic
2987186	2987746	2987333	25.1024	genic
1392504	1392794	1392649	25.0315	genic
1804233	1804503	1804386	25.0157	intergenic
918245	918577	918441	24.4961	intergenic
536557	537061	536893	24.1811	genic
3265142	3265432	3265286	24.0709	intergenic
4046948	4047220	4047097	23.8898	genic
234082	234367	234233	23.8504	genic
1516679	1516961	1516834	23.5591	genic
3497026	3497383	3497156	23.5591	genic
1738519	1738785	1738670	23.3386	genic
773739	773998	773855	23.2441	intergenic
3169766	3170345	3169893	23.1732	intergenic
4440169	4440443	4440265	22.9921	intergenic
3066754	3067057	3066922	22.9528	intergenic
675647	675951	675817	22.8346	intergenic
1463255	1463532	1463419	22.8346	genic
1650283	1650577	1650441	22.5512	genic
2487019	2487288	2487165	22.5354	genic
4458131	4458404	4458283	22.4488	genic
1393083	1393344	1393223	22.3937	genic
3672632	3672962	3672811	22.3858	genic
4434514	4434834	4434633	21.9606	intergenic
3359826	3360127	3359982	21.8189	intergenic
3064668	3065233	3064889	21.7874	genic
3098757	3099033	3098908	21.063	intergenic
2483487	2483777	2483632	20.8898	genic
2383697	2383997	2383854	20.8661	intergenic
1430319	1430601	1430484	20.7795	genic
3648960	3649488	3649355	20.5669	genic
400008	400616	400152	20.4882	intergenic
1839408	1839673	1839536	20.0236	genic
155637	155903	155771	19.8583	genic
986060	986687	986204	19.748	genic
3738248	3738518	3738392	19.7402	genic
1632744	1633019	1632863	19.7244	genic
1492537	1492870	1492736	19.5906	genic
1419054	1419340	1419179	19.5276	genic
2931415	2931700	2931554	19.5039	genic
2008007	2008277	2008134	19.3858	genic
4470667	4470926	4470803	19.2047	intergenic
3077205	3077628	3077344	19.0866	genic
2783773	2784280	2783924	19.0079	intergenic
4478196	4478501	4478322	18.9055	genic
3061930	3062201	3062091	18.7323	genic
2985789	2986095	2985944	18.6929	genic
3595918	3596161	3596075	18.622	genic
2995741	2996022	2995883	18.4882	genic
3265685	3265982	3265837	18.4803	intergenic
1772403	1772670	1772529	18.378	genic
2513737	2513999	2513884	18.3228	genic
2798012	2798263	2798106	18.3228	intergenic
532051	532322	532179	18.315	intergenic
2762575	2762844	2762710	18.2835	genic
3397872	3398124	3398015	18.0315	intergenic
4475138	4475418	4475294	17.8976	intergenic
1637954	1638213	1638095	17.7795	genic
4381885	4382152	4382020	17.5906	genic
2520432	2520706	2520582	17.5118	intergenic
434634	434905	434772	17.4646	genic
2295304	2295566	2295447	17.2913	genic
3607147	3607406	3607272	17.2283	genic
1664919	1665182	1665055	17.1732	genic
2870208	2870458	2870329	17.0787	genic
479907	480467	480057	16.8031	intergenic
3193050	3193302	3193156	16.748	genic
2219884	2220177	2220000	16.7323	genic
1839766	1840010	1839880	16.7244	genic
2021414	2021670	2021516	16.5591	genic
182322	182594	182460	16.3228	intergenic
2943477	2943723	2943614	16.1496	genic
3428652	3428956	3428782	15.9843	genic
2985079	2985529	2985318	15.874	intergenic
2276384	2276654	2276521	15.8268	intergenic
2800218	2800473	2800358	15.6772	genic
2627041	2627367	2627183	15.5039	intergenic
3865604	3865879	3865732	15.5039	intergenic
252125	252404	252250	15.3937	genic
1807210	1807477	1807319	15.2598	intergenic
2826524	2826763	2826630	15.1811	intergenic
1496013	1496291	1496163	15.1339	genic
4039868	4040151	4040022	15.126	genic
4089683	4089935	4089812	15.0787	genic
115260	115517	115403	15.0079	genic
571032	571542	571186	14.7953	genic
4002658	4002943	4002822	14.748	intergenic
568385	568656	568510	14.685	genic
3867894	3868140	3868009	14.5748	genic
4607304	4607549	4607430	14.5748	intergenic
4295057	4295303	4295188	14.4252	intergenic
389104	389417	389220	14.4173	intergenic
4530235	4530497	4530392	14.3937	intergenic
1655832	1656085	1655954	14.3543	intergenic
4352629	4353151	4352830	14.2835	intergenic
2998350	2998610	2998495	14.2126	genic
3534631	3534914	3534783	14.1417	intergenic
1557970	1558331	1558192	13.9606	genic
1559701	1559948	1559827	13.9055	genic
2836441	2836769	2836652	13.8661	genic
1876239	1876486	1876346	13.8346	genic
1152405	1152662	1152528	13.8189	genic
3076785	3077063	3076950	13.7874	genic
1431958	1432213	1432100	13.7717	genic
776824	777066	776947	13.748	intergenic
3675046	3675273	3675187	13.6693	genic
1095891	1096130	1095993	13.4488	genic
1434171	1434430	1434288	13.378	genic
1342641	1342881	1342787	13.3386	genic
2246441	2246720	2246567	13.315	intergenic
3886342	3886957	3886614	13.2835	intergenic
1544387	1544640	1544505	13.2598	genic
2029997	2030246	2030126	13.2441	genic
2051288	2051715	2051573	13.2283	intergenic
4603632	4603868	4603734	13.2283	intergenic
1091544	1092075	1091687	13.2126	intergenic
3834320	3834562	3834440	13.2126	intergenic
1071867	1072132	1072013	13.1732	genic
130069	130312	130198	13.1339	genic
4426699	4426957	4426848	13.063	intergenic
3794962	3795296	3795147	13.0551	genic
4041052	4041321	4041198	12.9764	genic
1116474	1116718	1116583	12.8976	genic
4250917	4251169	4251048	12.8031	genic
1049816	1050104	1049989	12.7402	intergenic
1769888	1770150	1770035	12.6929	genic
4565742	4565979	4565884	12.685	genic
3723678	3723943	3723820	12.6535	intergenic
1847668	1847917	1847797	12.6299	genic
3653176	3653449	3653310	12.6299	genic
584813	585293	585188	12.4724	intergenic
2236691	2236949	2236829	12.3543	genic
3793285	3793498	3793355	12.3307	genic
1084002	1084281	1084141	12.2835	intergenic
2062605	2062839	2062725	12.252	genic
680250	680605	680473	12.2362	genic
2480354	2480629	2480481	12.1969	genic
1355590	1355833	1355745	12.126	intergenic
3356315	3356546	3356435	12.1102	genic
3224502	3224738	3224620	12.1024	genic
2063794	2064044	2063919	12.0472	intergenic
4591263	4591473	4591360	12.0157	intergenic
2445894	2446143	2446007	11.9291	genic
640962	641214	641070	11.8976	genic
1120554	1120800	1120696	11.8898	genic
2290427	2290676	2290546	11.8268	genic
1254878	1255344	1255012	11.7087	genic
2976863	2977112	2977001	11.6693	intergenic
2346689	2346932	2346830	11.6457	intergenic
1114640	1114883	1114747	11.5669	intergenic
2627520	2627856	2627705	11.5433	intergenic
2697655	2697929	2697790	11.4252	genic
3131802	3132096	3131928	11.4252	genic
3574099	3574344	3574218	11.4252	genic
3633306	3633525	3633428	11.4252	genic
3672302	3672611	3672431	11.4252	intergenic
1789998	1790253	1790118	11.4016	intergenic
3011757	3012007	3011892	11.3858	genic
1019258	1019518	1019394	11.3622	intergenic
2783390	2783640	2783527	11.3071	intergenic
1434943	1435211	1435067	11.2992	intergenic
3593862	3594099	3593996	11.2677	genic
4536162	4536396	4536277	11.2677	genic
564749	565032	564865	11.2598	genic
240154	240392	240285	11.2047	intergenic
1739050	1739320	1739224	11.1969	intergenic
4576970	4577289	4577102	11.0709	genic
3895551	3895811	3895683	10.8819	genic
437076	437314	437206	10.8425	genic
2172945	2173250	2173086	10.8031	genic
2807586	2807811	2807729	10.8031	genic
1939997	1940237	1940111	10.7795	genic
1052317	1052533	1052447	10.7008	genic
1710146	1710418	1710319	10.6929	intergenic
3797276	3797887	3797737	10.6142	genic
2213570	2213806	2213699	10.6063	genic
1752951	1753431	1753164	10.5827	genic
4194848	4195093	4194993	10.5748	genic
2982106	2982344	2982213	10.5591	intergenic
1629553	1629777	1629681	10.5276	genic
2663304	2663540	2663446	10.4882	intergenic
1528826	1529079	1528947	10.4409	genic
2757069	2757331	2757200	10.4409	genic
669877	670130	669994	10.3937	genic
2061246	2061484	2061349	10.3858	intergenic
4437248	4437567	4437437	10.3858	intergenic
1658408	1658618	1658507	10.2756	genic
3005287	3005650	3005518	10.2598	intergenic
3908308	3908553	3908442	10.2362	intergenic
3285264	3285537	3285451	10.189	genic
1631137	1631397	1631207	10.1496	genic
4578437	4578691	4578537	10.1417	genic
584004	584244	584133	10.126	genic
563460	563761	563569	10.0866	genic
1058129	1058362	1058250	10.0315	genic
1973220	1973455	1973322	10.0315	genic
3630863	3631170	3631010	9.9921	genic
2041954	2042192	2042088	9.937	genic
540753	540969	540842	9.9134	genic
1083666	1083896	1083782	9.8504	genic
1949101	1949332	1949230	9.7717	genic
1625332	1625576	1625433	9.7244	intergenic
3458952	3459208	3459092	9.7087	genic
3657322	3657549	3657420	9.6772	genic
4372239	4372571	4372455	9.6693	intergenic
3022906	3023162	3023041	9.622	genic
949056	949351	949219	9.6142	genic
1696659	1696895	1696785	9.5197	genic
999247	999474	999364	9.5118	genic
2573898	2574145	2574048	9.5039	intergenic
3435819	3436117	3435914	9.4803	genic
4477548	4478096	4477725	9.4567	intergenic
398846	399150	399047	9.4252	intergenic
1585458	1585677	1585575	9.4173	genic
4045309	4045534	4045422	9.3937	genic
996638	996888	996735	9.378	genic
1341393	1341636	1341497	9.3701	intergenic
2789051	2789265	2789145	9.3307	genic
2918803	2919013	2918921	9.315	genic
2065813	2066071	2065940	9.2913	intergenic
4425068	4425318	4425174	9.2835	genic
2705034	2705266	2705148	9.2126	intergenic
310841	311118	310982	9.1339	intergenic
1953552	1953777	1953665	9.1102	genic
4470282	4470514	4470406	9.1024	genic
1250120	1250338	1250273	9.0945	intergenic
2764866	2765161	2765044	9.0709	genic
1925873	1926084	1926030	9.063	genic
4266441	4266710	4266588	9.063	intergenic
592303	592558	592436	9.0472	intergenic
3315996	3316276	3316137	9.0315	intergenic
3819290	3819533	3819403	8.9764	intergenic
1090126	1090352	1090228	8.9528	genic
3671257	3671473	3671341	8.9449	intergenic
553093	553342	553207	8.9213	genic
2066101	2066350	2066219	8.9213	intergenic
3218813	3219053	3218900	8.9213	intergenic
2315987	2316215	2316088	8.9134	genic
3939250	3939474	3939358	8.9134	intergenic
3983351	3983585	3983471	8.8819	genic
4291365	4291612	4291501	8.8425	genic
1403785	1404022	1403916	8.7953	intergenic
3713985	3714221	3714109	8.7953	genic
1468734	1468965	1468861	8.7795	intergenic
4347087	4347399	4347271	8.7087	intergenic
28155	28383	28271	8.6693	intergenic
1664233	1664421	1664332	8.6063	genic
2081855	2082061	2081980	8.5827	genic
985447	985697	985583	8.5354	genic
3958207	3958442	3958339	8.5276	genic
238063	238310	238191	8.5039	intergenic
4022315	4022542	4022424	8.4646	genic
3299279	3299600	3299408	8.4488	intergenic
2892118	2892337	2892223	8.4094	genic
2960807	2961012	2960910	8.4016	genic
4393686	4393912	4393805	8.378	genic
2488360	2488627	2488483	8.3701	genic
3583886	3584117	3584013	8.3071	genic
841293	841551	841396	8.2756	intergenic
2535240	2535478	2535364	8.2283	genic
2052554	2052782	2052663	8.2205	genic
1628839	1629057	1628970	8.2047	intergenic
3909526	3909752	3909600	8.1969	intergenic
2110658	2110898	2110788	8.189	genic
4146516	4146732	4146618	8.1732	genic
2924210	2924413	2924316	8.1575	intergenic
2190652	2190937	2190798	8.1417	genic
3638177	3638391	3638265	8.1339	genic
4010892	4011141	4011044	8.1102	intergenic
2703364	2703580	2703452	8.0945	genic
3320383	3320632	3320495	8.0866	genic
2468587	2468910	2468735	8.0787	intergenic
1840216	1840447	1840378	8.0551	intergenic
1984190	1984440	1984301	8.0236	intergenic
1266900	1267124	1266990	8.0157	genic
3111052	3111257	3111175	8.0079	genic
1298926	1299163	1299035	7.9921	intergenic
1997432	1997643	1997503	7.9528	genic
1923251	1923487	1923371	7.9449	intergenic
416190	416408	416261	7.9134	intergenic
497114	497305	497184	7.9134	intergenic
3804568	3804788	3804672	7.9055	genic
246014	246277	246165	7.8898	genic
2759120	2759326	2759226	7.874	intergenic
3692326	3692562	3692459	7.8268	genic
2955007	2955230	2955121	7.7874	genic
734689	734915	734790	7.7717	genic
3360568	3360815	3360693	7.7717	genic
2903378	2903669	2903457	7.7008	intergenic
4398192	4398414	4398299	7.6378	intergenic
2762229	2762468	2762381	7.6142	genic
637962	638203	638094	7.5827	intergenic
865614	865837	865708	7.5669	intergenic
3331412	3331626	3331537	7.5433	intergenic
3415552	3415767	3415676	7.5276	genic
34012	34250	34144	7.5118	intergenic
943949	944148	944054	7.4803	genic
617736	617958	617863	7.4724	genic
1771974	1772200	1772095	7.4646	genic
4025728	4025946	4025826	7.4409	genic
2474318	2474557	2474444	7.4094	genic
152940	153182	153063	7.4016	genic
4576252	4576514	4576360	7.3937	genic
2165811	2166022	2165875	7.378	intergenic
3529860	3530078	3529935	7.378	genic
3819849	3820052	3819941	7.3701	genic
949427	949671	949584	7.315	genic
527939	528163	528020	7.2835	genic
189426	189665	189516	7.252	intergenic
1032976	1033180	1033077	7.252	genic
753385	753620	753521	7.2283	genic
4114819	4115048	4114935	7.2126	genic
2411193	2411454	2411322	7.189	intergenic
1768762	1769072	1768973	7.1811	genic
3580163	3580386	3580268	7.1811	genic
1219455	1219721	1219580	7.1575	genic
1776770	1776994	1776875	7.1496	genic
1977469	1977808	1977595	7.1496	intergenic
1587666	1587857	1587761	7.1417	genic
1619526	1619729	1619642	7.1417	genic
1917830	1918017	1917908	7.1339	genic
4375423	4375636	4375506	7.1339	genic
1676148	1676380	1676245	7.0945	intergenic
1850343	1850527	1850430	7.0551	genic
3531235	3531439	3531354	7.0472	genic
1222539	1222767	1222649	7.0394	genic
4213811	4214019	4213939	7.0394	genic
299421	299631	299556	7.0236	genic
324031	324258	324123	6.9449	genic
2666493	2666697	2666608	6.9055	genic
4083974	4084196	4084102	6.9055	genic
2340303	2340501	2340420	6.8819	genic
2857576	2857834	2857694	6.8661	intergenic
2900264	2900468	2900384	6.8661	genic
487321	487534	487420	6.8189	genic
3281042	3281229	3281163	6.8189	intergenic
2151059	2151274	2151149	6.8031	genic
4333296	4333504	4333408	6.7795	genic
2988571	2988937	2988825	6.7244	genic
849442	849716	849592	6.7165	intergenic
2495709	2495907	2495827	6.7165	genic
240400	240633	240512	6.6772	genic
578218	578446	578331	6.6535	intergenic
2485300	2485513	2485399	6.6535	genic
678752	678999	678868	6.6378	genic
3319135	3319395	3319278	6.6299	genic
2827111	2827304	2827224	6.6142	genic
410927	411107	411030	6.6063	genic
2271857	2272032	2271917	6.6063	genic
150868	151129	151034	6.5984	genic
216507	216761	216637	6.5984	genic
4078065	4078255	4078177	6.5906	intergenic
3076428	3076634	3076545	6.5591	genic
320451	320856	320659	6.5197	intergenic
3798202	3798474	3798348	6.5197	genic
118623	118791	118719	6.5118	intergenic
3368471	3368643	3368556	6.5039	genic
2990642	2991253	2991115	6.4961	genic
2098056	2098238	2098175	6.4646	genic
1613685	1613888	1613777	6.4173	intergenic
1169560	1169744	1169686	6.3937	intergenic
2095803	2096034	2095923	6.3858	genic
2980228	2980461	2980321	6.3543	intergenic
1908197	1908375	1908288	6.3307	intergenic
3412317	3412497	3412388	6.315	genic
3844295	3844520	3844460	6.315	genic
2282693	2282873	2282780	6.2677	genic
1403046	1403266	1403138	6.2598	genic
2902661	2902861	2902740	6.2598	intergenic
1194063	1194256	1194145	6.1969	genic
2104726	2105105	2104997	6.1732	genic
554127	554322	554225	6.1102	genic
569417	569664	569551	6.0787	genic
1894608	1894811	1894717	6.0787	genic
4427667	4428056	4427745	6.0472	intergenic
1091180	1091390	1091289	6.0394	genic
3719264	3719461	3719375	6.0315	genic
4609006	4609214	4609084	6.0236	intergenic
2956705	2956894	2956813	5.9764	genic
3134475	3134727	3134607	5.9764	intergenic
3464825	3465056	3464917	5.9685	genic
4131602	4131825	4131761	5.9685	intergenic
1255411	1255641	1255542	5.9606	intergenic
1276843	1277185	1276880	5.937	intergenic
2739443	2739743	2739522	5.9055	genic
3887965	3888462	3888295	5.9055	genic
4077462	4077925	4077572	5.8898	intergenic
553602	553828	553745	5.8819	intergenic
819826	819997	819889	5.874	intergenic
1120238	1120419	1120373	5.8661	intergenic
1301570	1301756	1301698	5.8583	genic
2709577	2709758	2709673	5.8425	genic
3561548	3561752	3561643	5.811	intergenic
4504485	4504713	4504596	5.8031	genic
3899237	3899432	3899345	5.7953	genic
4272680	4272861	4272777	5.7953	intergenic
3416170	3416400	3416313	5.7874	intergenic
2466200	2466470	2466279	5.7559	genic
1907120	1907347	1907220	5.7087	intergenic
1236617	1236816	1236708	5.6535	intergenic
3242716	3242907	3242757	5.6378	genic
3463410	3463600	3463494	5.6378	genic
931343	931609	931457	5.6299	intergenic
3170952	3171172	3171068	5.5984	genic
2795464	2795631	2795554	5.5591	genic
1000783	1000986	1000893	5.5354	genic
3581317	3581480	3581448	5.4961	intergenic
3250842	3251006	3250972	5.4882	genic
331373	331614	331513	5.4803	intergenic
4577307	4577483	4577355	5.4803	genic
3096651	3096854	3096765	5.4646	genic
4446310	4446496	4446394	5.4567	intergenic
3362330	3362525	3362404	5.4488	genic
1432818	1433209	1433070	5.4331	intergenic
3198934	3199091	3198983	5.3622	genic
145699	145878	145819	5.2992	genic
3633968	3634176	3634083	5.2677	intergenic
757326	757541	757455	5.2441	genic
2895841	2896003	2895917	5.2205	intergenic
688449	688632	688574	5.2126	genic
429779	429955	429859	5.189	genic
1771697	1771890	1771794	5.1811	genic
3902781	3902952	3902866	5.1575	genic
2097652	2097863	2097773	5.1024	intergenic
3353932	3354117	3354017	5.0945	genic
2001734	2001935	2001880	5.0866	intergenic
2060000	2060231	2060104	5.0787	intergenic
3672023	3672216	3672120	5.063	genic
4050181	4050339	4050255	5	genic
2591069	2591248	2591157	4.9921	genic
3975414	3975591	3975508	4.9843	genic
3663984	3664224	3664079	4.9685	intergenic
2448137	2448296	2448216	4.937	genic
3411664	3411874	3411782	4.9213	intergenic
215192	215342	215255	4.9134	genic
4341973	4342200	4342103	4.9055	genic
4524052	4524230	4524152	4.9055	genic
4085545	4085717	4085597	4.8819	genic
1422998	1423194	1423084	4.8661	genic
1515625	1515811	1515724	4.8583	genic
1542477	1542667	1542617	4.8504	intergenic
2462296	2462482	2462398	4.8425	genic
2923724	2923899	2923813	4.8268	genic
3582477	3582732	3582597	4.811	intergenic
296848	297020	296922	4.8031	genic
1620599	1620772	1620633	4.8031	intergenic
384103	384314	384219	4.7953	intergenic
4571784	4571997	4571882	4.7953	genic
2889978	2890149	2890031	4.7874	intergenic
1910535	1910733	1910606	4.7638	intergenic
4008114	4008290	4008228	4.7638	genic
4094497	4094652	4094574	4.7638	genic
2969176	2969358	2969272	4.7402	intergenic
1775056	1775218	1775121	4.7165	genic
494171	494341	494217	4.6929	genic
526701	526860	526792	4.6614	intergenic
1660958	1661108	1661017	4.5984	genic
3509934	3510112	3510020	4.5748	genic
3967267	3967430	3967355	4.5591	genic
1116789	1116964	1116883	4.5433	genic
3154564	3154749	3154651	4.5354	genic
301998	302174	302112	4.5276	intergenic
1525572	1525741	1525673	4.5039	intergenic
799361	799559	799454	4.4724	genic
1821201	1821362	1821327	4.4646	intergenic
2033439	2033611	2033564	4.4646	intergenic
2481289	2481519	2481403	4.4567	intergenic
1212083	1212278	1212182	4.4488	genic
608713	608854	608803	4.4331	genic
1051804	1051992	1051895	4.3937	genic
4568502	4568659	4568595	4.3386	genic
2087116	2087282	2087207	4.3228	intergenic
4497601	4497779	4497692	4.2835	genic
4058324	4058463	4058415	4.252	intergenic
4354357	4354527	4354435	4.2126	intergenic
4108565	4108712	4108622	4.1732	genic
867337	867494	867378	4.1575	genic
2238298	2238468	2238376	4.1575	intergenic
3452736	3452910	3452813	4.1496	genic
3969234	3969393	3969318	4.126	genic
3242935	3243130	3243049	4.1102	intergenic
3848820	3848987	3848919	4.1024	genic
1523626	1523770	1523699	4.0709	genic
2877089	2877282	2877259	4.0551	genic
3119621	3119775	3119692	4.0551	genic
3531730	3531876	3531845	4.0079	genic
2479626	2479784	2479663	3.9213	genic
750568	750731	750660	3.9055	genic
860230	860380	860262	3.8504	genic
799853	800001	799955	3.8425	intergenic
3644524	3644682	3644608	3.8425	genic
944873	945074	944966	3.622	intergenic
3074941	3075108	3075011	3.5512	genic
2247639	2247796	2247715	3.5039	intergenic
